# Supplementary material for: The global epidemiology and health burden of the autism spectrum: findings from the Global Burden of Disease Study 2021
Source: PubMed Central journal article supplement (PMC11750762; doi:10.1016/s2215-0366(24)00363-8), 2025-02
Supplement: mmc2.pdf [file mmc2.pdf]

# THE LANCET Psychiatry

## Supplementary appendix 2

This appendix formed part of the original submission and has been peer reviewed. We post it as supplied by the authors.

Supplement to: Global Burden of Disease Study 2021 Autism Spectrum Collaborators. The global epidemiology and health burden of the autism spectrum: findings from the Global Burden of Disease Study 2021. *Lancet Psychiatry* 2024; published online Dec 19. [https://doi.org/10.1016/S2215-0366\(24\)00363-8](https://doi.org/10.1016/S2215-0366(24)00363-8).

## Contents

|                                                                                                                                                             |    |
|-------------------------------------------------------------------------------------------------------------------------------------------------------------|----|
| Section 1. Supplementary methods .....                                                                                                                      | 2  |
| Section 1.1. Adjustments to input data for DisMod-MR 2.1.....                                                                                               | 2  |
| Section 1.2. Prior settings in the estimation of the epidemiology of ASD in DisMod-MR 2.1.....                                                              | 2  |
| Section 1.3. Estimation of the proportion of autistic persons with each level of intellectual disability .....                                              | 3  |
| Section 1.4. Estimation of the sequela-specific disability weights.....                                                                                     | 4  |
| Section 1.5. Comorbidity adjustment to years lived with disability.....                                                                                     | 4  |
| Section 2. Figures and tables.....                                                                                                                          | 5  |
| Figure S1: Overview of the estimation of prevalence and DALYs for the autism spectrum.....                                                                  | 5  |
| Figure S2: Preferred Reporting Items for Systematic Reviews and Meta-Analyses (PRISMA) 2009 flow diagram for the GBD 2017 initial systematic-review .....   | 6  |
| Figure S3: Preferred Reporting Items for Systematic Reviews and Meta-Analyses (PRISMA) 2020 flow diagram for the GBD 2021 systematic-review update .....    | 7  |
| Figure S4: Hierarchy of meta-analyses conducted to estimate the proportion of autistic persons with each level of ID.....                                   | 8  |
| Figure S5: Forest plot of the meta-analysis of the proportion of autistic persons that present with any ID .....                                            | 9  |
| Figure S6: Forest plot of the meta-analysis of the proportion of autistic persons without ID that present with borderline ID.....                           | 9  |
| Figure S7: Forest plot of the meta-analysis of the proportion of autistic persons with ID that present with mild ID.....                                    | 10 |
| Figure S8: Forest plot of the meta-analysis of the proportion of autistic persons with moderate, severe, or profound ID that present with moderate ID ..... | 10 |
| Figure S9: Forest plot of the meta-analysis of the proportion of autistic persons with severe or profound ID that present with severe ID...                 | 11 |
| Figure S10: Forest plot of the meta-analysis of the proportion of autistic persons that meet criteria for DSM-IV autistic disorder.....                     | 11 |
| Table S1: Guidelines for Accurate and Transparent Health Estimates Reporting (GATHER) checklist .....                                                       | 12 |
| Table S2: Search strings used in electronic databases.....                                                                                                  | 14 |
| Table S3: Preferred Reporting Items for Systematic Reviews and Meta-Analyses (PRISMA) checklist.....                                                        | 15 |
| Table S4: Lay descriptions and disability weights for the health states informing autism spectrum sequelae in the GBD 2021 Study.....                       | 18 |
| Table S5: Age-standardised prevalence of ASD per 100 000 persons by location and sex, 2021 .....                                                            | 19 |
| Table S6: Age-standardised prevalence of ASD sequelae per 100 000 persons by location, 2021 .....                                                           | 30 |
| Table S7: Age-standardised DALY rates per 100 000 persons attributable to ASD by location and sex, 2021 .....                                               | 50 |
| Section 3. References.....                                                                                                                                  | 61 |

## Section 1. Supplementary methods

### Section 1.1. Adjustments to input data for DisMod-MR 2.1

Two adjustments were applied to estimates prior to analysis in DisMod-MR 2.1. First, data that aggregated across males and females within the study sample were split into sex-specific estimates. For data sources reporting age-specific and separately, sex-specific estimates (but not age-sex-specific estimates), the age-specific estimates were adjusted using the within-study sex-ratio. Data sources not reporting sex-specific estimates were adjusted using the pooled within-study sex-ratio across all respective sex-specific estimates estimated via meta-regression—Bayesian, regularised, and trimmed (MR-BRT).<sup>1</sup> Second, known sources of bias in the input prevalence data were adjusted for using MR-BRT. Reference epidemiological data for ASD were estimates that represented autistic persons from general population surveys with additional case-finding or population screening. To maximise data-inclusion, estimates representing DSM-IV autistic disorder / ICD-10 childhood autism or sourced from general population surveys without additional case-finding were also included as non-reference data and adjusted for prior to analysis in DisMod-MR 2.1. Within the ASD epidemiological dataset, within-study estimates were paired by age, sex, location, and year, between the reference and alternative estimates. The difference in logit prevalence between these estimates were then used as inputs in a network meta-analysis conducted via meta-regression—Bayesian, regularised, and trimmed (MR-BRT).<sup>1</sup> This analysis produced pooled log-odds between the reference estimates and alternative estimates that were used to adjust all alternative estimates prior to analysis. To reflect the added uncertainty around alternative estimates, the uncertainty intervals (UIs) for the adjustment factors incorporated gamma from the MR-BRT analysis, which represented the between study standard deviation across all the input data. The pooled log-odds between estimates of the autism sub-disorder and ASD was 0.44 (95% UI: 0.39 – 0.50) whereas the pooled log-odds between estimates from general population surveys without additional case-finding and reference sampling methodology was 0.70 (95% UI: 0.61 – 0.82).

### Section 1.2. Settings in the estimation of the epidemiology of ASD in DisMod-MR 2.1

GBD 2021 followed a cause hierarchy with four levels. Level 0 represented the aggregate of all causes within GBD 2021. Level 1 included other COVID-19 pandemic-related outcomes and aggregated groups of communicable, maternal, neonatal and nutritional diseases; non-communicable diseases; and injuries respectively. Level 2 disaggregated level 1 causes into 22 smaller groupings (including the aggregate of all mental disorders). Level 3 disaggregated Level 2 causes into 175 diseases and injuries (including ASD). Level 4 further disaggregated 43 level 3 causes. Several prior settings were used to guide the DisMod-MR 2.1 estimation of prevalence based on the available data and feedback from experts in the field. Autistic persons were autistic across the lifespan (incidence at birth and no remission) and a maximum excess mortality rate of 0.3 was used to align with the upper confidence interval of the highest reported excess mortality estimate in the dataset. We allowed a time window of 15 years due to limited data across time, which meant estimates would inform prevalence 15 years before and after when the estimate was collected. The Healthcare Access Quality Index (HAQI) was placed as a location-level covariate on excess mortality. The HAQI is informed by the mortality rate of 32 causes of death which are typically prevented in the presence of effective care.<sup>2</sup>

### Section 1.3. Estimation of the proportion of autistic persons with each level of intellectual disability

From the systematic review of epidemiological estimates, 19 studies were sourced that used the reference sampling methodology and reported the proportion of autistic persons by intellectual disability (ID). However, studies differed in the granularity of reporting with most studies only reporting the proportion of autistic persons that presented with any ID (IQ < 70). To maximise data-inclusion, five meta-analyses were conducted in R using the metafor package<sup>3,4</sup> to estimate the proportion of autistic persons living with each level of ID. Figure S4 illustrates the hierarchy of meta-analyses conducted and the number of studies used for each analysis. Each meta-analysis split the autistic population into finer groups of ID. For example meta-analysis #1 estimated the proportion of those with any ID out of all cases, and then meta-analysis #3 estimated the proportion of those with mild ID out of those with any ID.

No studies reported enough data to separate autistic persons meeting criteria for ASD by severe and profound ID. However there were six studies that looked at IQ by ASD sub-disorder, and together they suggested that the vast majority of cases with severe and profound ID would meet criteria for the autism sub-disorder of ASD.<sup>5-10</sup> Additionally there were five studies that provided enough data to separate persons meeting criteria for the autism sub-disorder by severe and profound ID. We therefore decided to conduct a meta-analysis on these five studies to inform this split.

Overall the pooled proportion of autistic persons that present with ID was 0.36 (95%UI: 0.30-0.42). Among autistic persons that do not present with ID, the pooled estimate of the proportion that present with borderline ID was 0.31 (95%UI: 0.26-0.36). Among those that do present with ID, the pooled estimate of the proportion presenting with mild ID was 0.42 (95%UI: 0.33-0.51). The pooled estimate of the proportion autistic persons presenting with moderate ID among those presenting with moderate, severe, or profound ID was 0.67 (95%UI: 0.53-0.78). Lastly the pooled proportion of autistic persons with severe or profound ID that present with profound ID was 0.19 (95%UI: 0.10-0.33). The forest plots of the meta-analyses are presented in Figures S5 to S9.

Because the denominator of meta-analyses #2 to #5 were subsamples of all autistic persons, the pooled proportions from these analyses had to be adjusted to represent the proportion of all autistic persons. We pulled 1000 draws (samples) from the logit distribution of proportion estimates from each meta-analysis, and adjusted the proportions at the draw level so that they represent the proportion of all autistic persons using the following formulas:

$$P_{No\ ID} = (1 - P_{Any\ ID}) \times (1 - S_{Borderline\ ID})$$

$$P_{Borderline\ ID} = (1 - P_{Any\ ID}) \times S_{Borderline\ ID}$$

$$P_{Mild\ ID} = P_{Any\ ID} \times S_{Mild\ ID}$$

$$P_{Moderate\ ID} = (P_{Any\ ID} - P_{Mild\ ID}) \times S_{Moderate\ ID}$$

$$P_{Severe\ ID} = (P_{Any\ ID} - P_{Mild\ ID} - P_{Moderate\ ID}) \times (1 - S_{Profound\ ID})$$

$$P_{Profound\ ID} = (P_{Any\ ID} - P_{Mild\ ID} - P_{Moderate\ ID}) \times S_{Profound\ ID}$$

Where  $P$  represents the proportion of all autistic persons, and  $S$  represents the proportion of the subsample from the meta-analysis. The 95% uncertainty intervals (UIs) were the 25<sup>th</sup> and 975<sup>th</sup> ranked values across the adjusted draws. This process produced severity proportions to split prevalence estimates into sequela-specific prevalence by age, sex, location, and year.

#### Section 1.4. Estimation of the sequela-specific disability weights

The disability weights of ASD in GBD 2021 represented the disability weight of ASD across six levels of ID, however, the disability weights surveys only provided disability weights for the health states *autism* and *Asperger's syndrome and other autism spectrum disorders* and *borderline, mild, moderate, severe, and profound intellectual disability* separately. To estimate disability weights for ASD and each level of ID, we first compiled the disability weights for relevant health states (see Table S4). We then estimated a pooled overall disability weight for ASD from the *Autism* and *Asperger's syndrome and other ASD* disability weights. The systematic review sourced 19 studies using the reference sampling methodology that reported the proportion of autistic persons that met criteria for the autism sub-disorder. We conducted a meta-analysis in R using the *metafor* package<sup>3,4</sup> on these proportions to estimate a pooled proportion. The pooled proportion of ASD cases estimated to meet criteria for the autism sub-disorder was 0.41 (95%UI: 0.36-0.47, see Figure S10 for forest plot). We pulled 1000 draws (samples) from the logit distribution of the pooled proportion of autistic persons that met criteria for the autism sub-disorder. We then pulled 1000 draws from the distribution of disability weights for *Autism* and *Asperger's syndrome and other ASD*, and weighted the draws of the disability weights by the draws of the pooled proportion:

$$DW_{ASD} = DW_{Autism} \times P_{Autism} + DW_{Other\ ASD} \times (1 - P_{Autism})$$

Where  $DW$  is disability weight and  $P_{Autism}$  is the proportion of autistic persons estimated to meet criteria for the DSM-IV autistic disorder / ICD-10 childhood autism. Then the disability weight for ASD and each level of ID was calculated as:

$$DW_{ASD+ID} = 1 - (1 - DW_{ASD}) \times (1 - DW_{ID})$$

#### Section 1.5. Comorbidity adjustment to years lived with disability

Sequela-specific prevalence estimates across all causes of burden were multiplied by their respective disability weights to calculate YLDs. This process was conducted for each sequela separately; however, an individual may live with multiple sequelae from different conditions simultaneously. To adjust YLDs for comorbidity, the co-occurrence of sequelae was simulated within a population of 20 000 simulated individuals for every age, sex, location, and year. Simulants were exposed to the independent probability of each sequela based on the modelled prevalence of that sequela. The probability of a simulant having two or more sequelae was therefore the product of the prevalence of those sequelae. A disability weight was then assigned for each simulant based on the sequelae that simulant had. Simulated individuals with multiple sequelae were estimated to have a cumulative disability weight that was a multiplicative function of the disability weights of those sequelae, and the disability weight uniquely attributable to each sequela was adjusted accordingly. The YLD rate for each sequela was then calculated for each simulated population (i.e. each age, sex, location, and year). Total YLD count for each sequela was calculated as the YLD rate multiplied by the population. YLDs for ASD were then calculated as the sum of the YLDs for the ASD sequelae. This simulation was repeated 500 times, with the uncertainty of prevalence, severity, and disability weights propagated throughout the calculations.

## Section 2. Figures and tables

Figure S1: Overview of the estimation of prevalence and DALYs for the autism spectrum

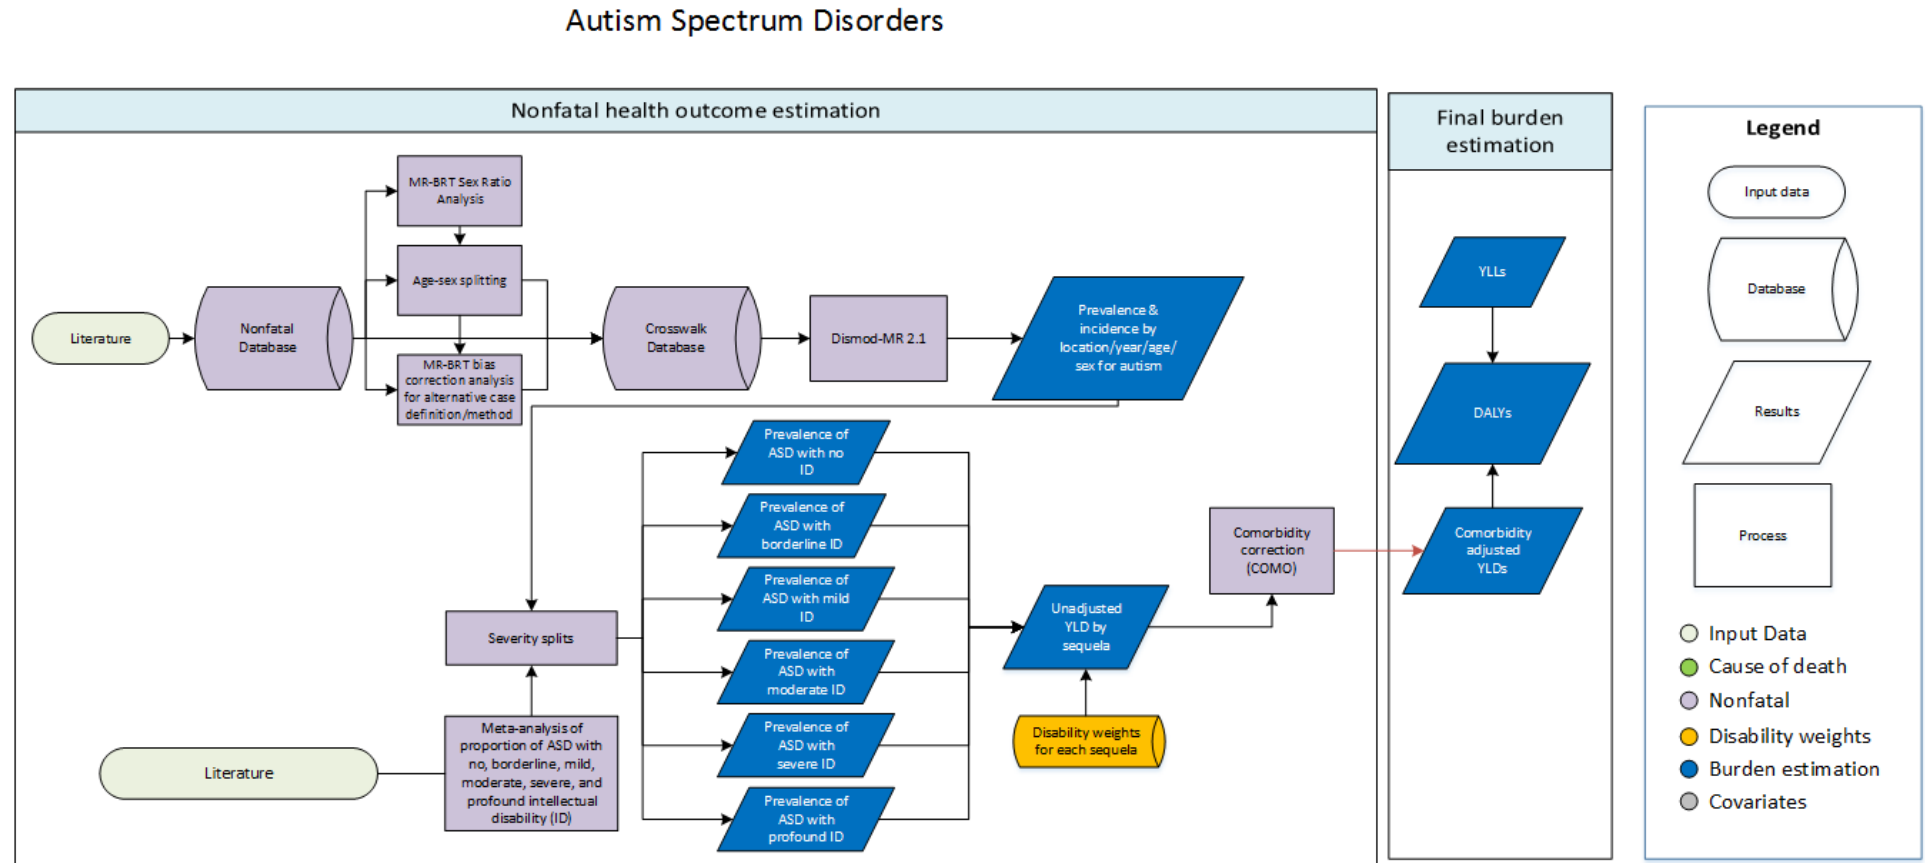

**Figure S2: Preferred Reporting Items for Systematic Reviews and Meta-Analyses<sup>11</sup> (PRISMA) 2009 flow**

**diagram for the GBD 2017 initial systematic-review**

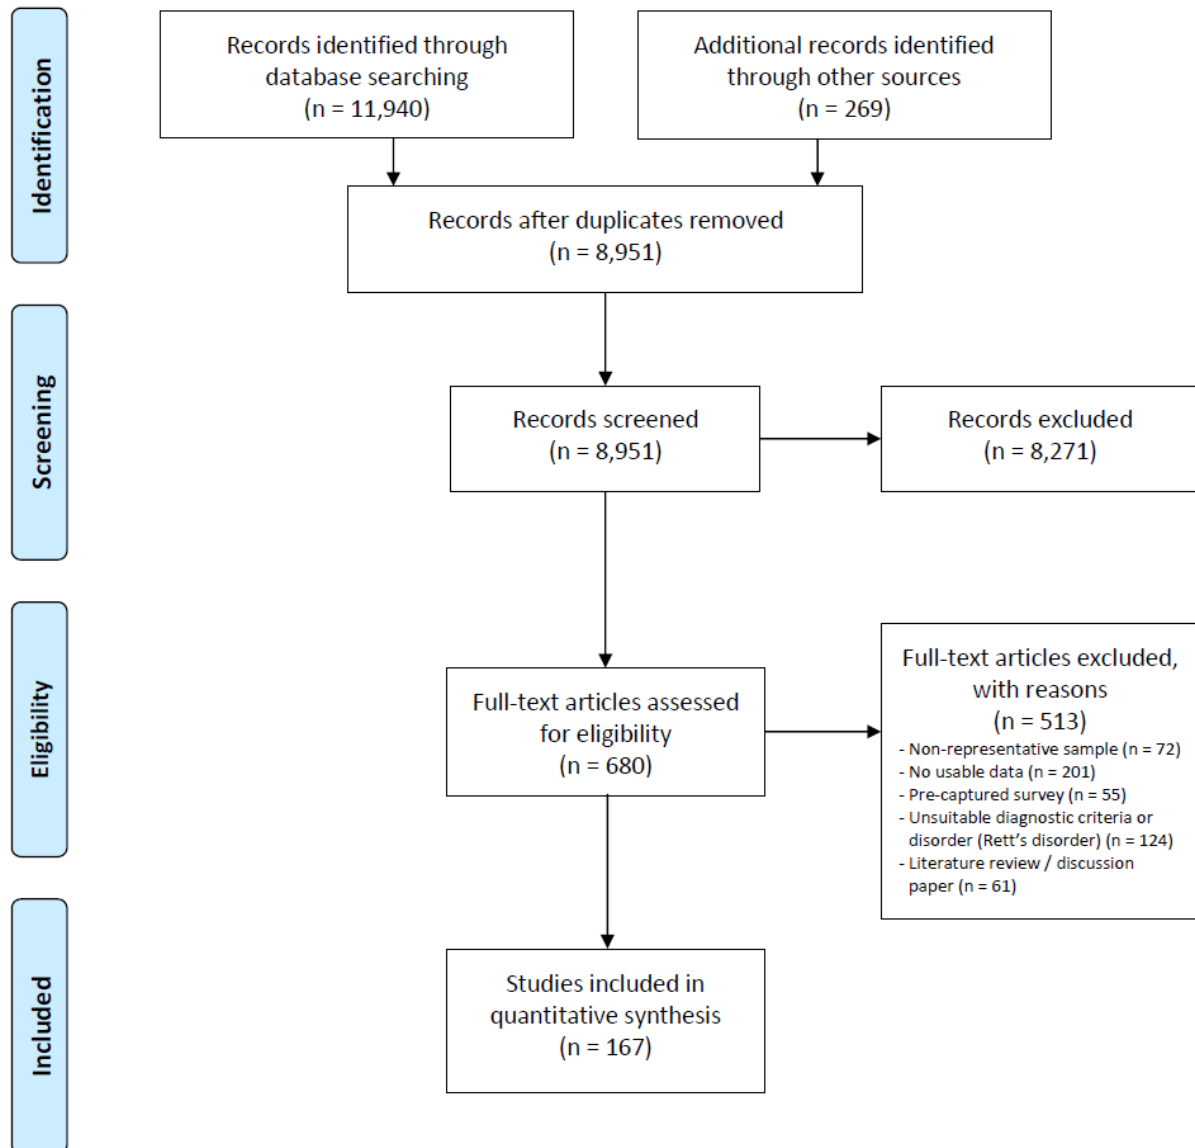

Note: The number of studies reported as “included in the previous version of review” for the GBD 2021 systematic review update (Figure S4) differs from the number of studies reported as included from the initial GBD 2017 systematic review (Figure S3) for several reasons. First, additional sources were provided by GBD collaborators for GBD 2019. Second, estimates using passive case finding (e.g., registry or administrative prevalence estimates) were excluded for GBD 2021 based on expert feedback. Third, new estimates may represent more granular estimates (e.g., by age or sex) of pre-captured studies and therefore new studies may replace (rather than add to) pre-captured studies.

Figure S3: Preferred Reporting Items for Systematic Reviews and Meta-Analyses<sup>12</sup> (PRISMA) 2020 flow

diagram for the GBD 2021 systematic-review update

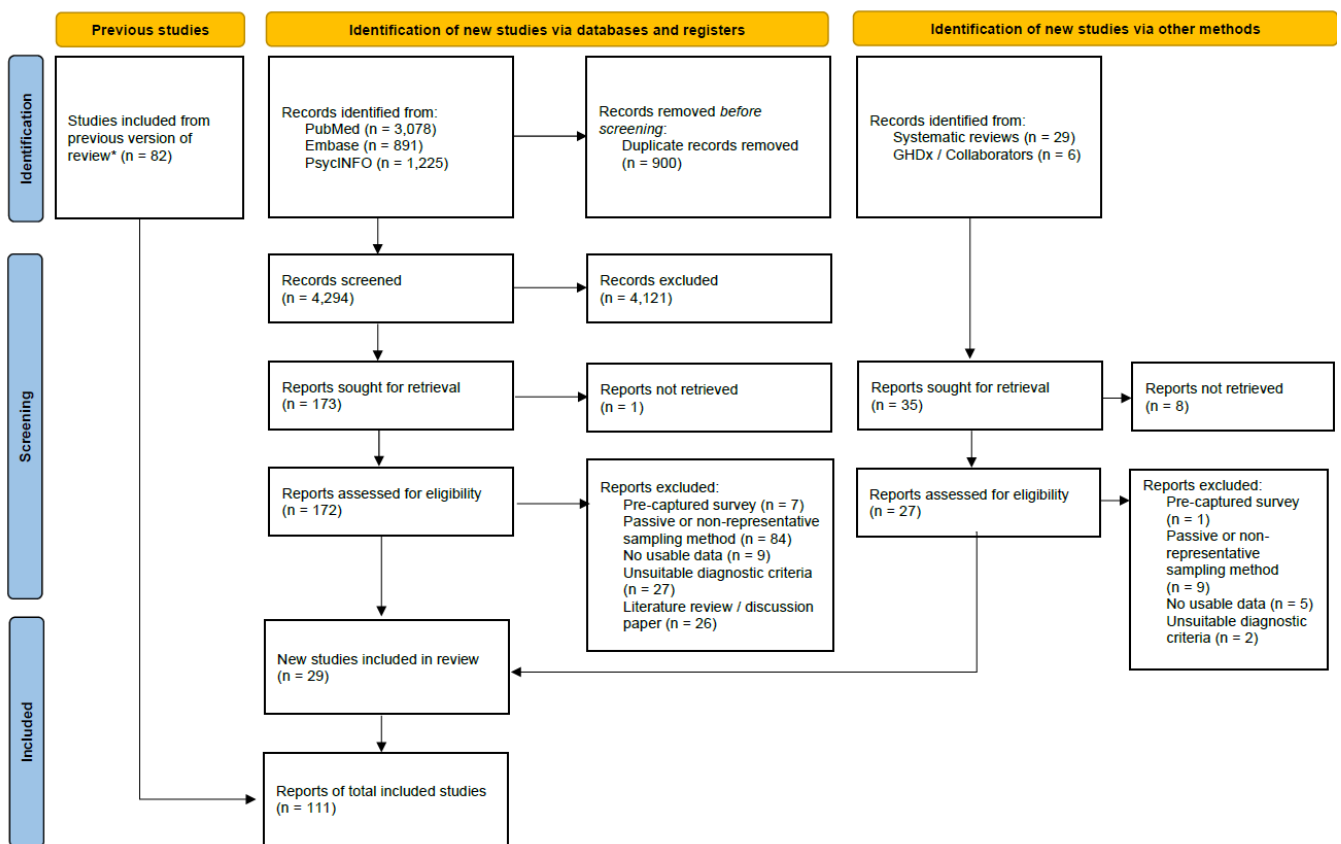

The number of studies reported as “included in the previous version of review” for the GBD 2021 systematic review update (Figure S4) differs from the number of studies reported as included from the GBD 2017 initial systematic review (Figure S3) for several reasons. First, additional sources were provided by GBD collaborators for GBD 2019. Second, estimates using passive case finding (e.g., registry or administrative prevalence estimates) were excluded for GBD 2021 based on expert feedback. Third, new estimates may represent more granular estimates (e.g., by age or sex) of pre-captured studies and therefore new studies may replace (rather than add to) pre-captured studies.



Figure S4: Hierarchy of meta-analyses conducted to estimate the proportion of autistic persons with each level of ID

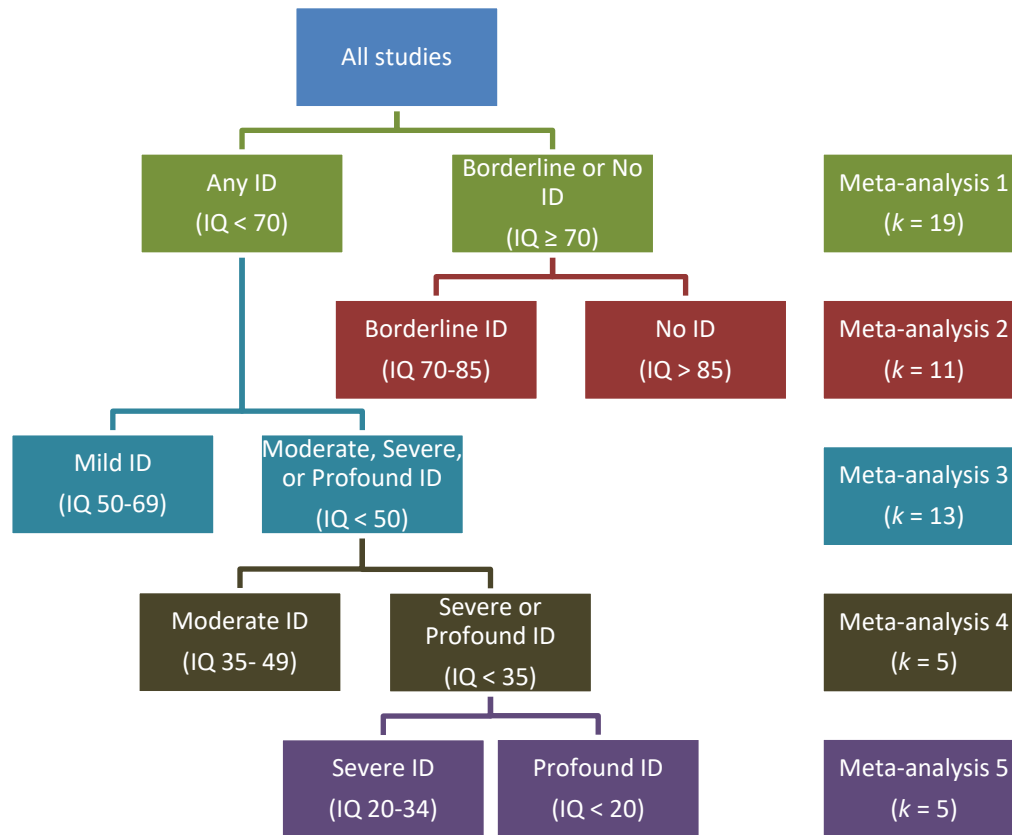

Note:  $k$  = number of studies used in meta-analysis. ID = Intellectual Disability. IQ = Intelligence Quotient.

**Figure S5: Forest plot of the meta-analysis of the proportion of autistic persons that present with any ID**

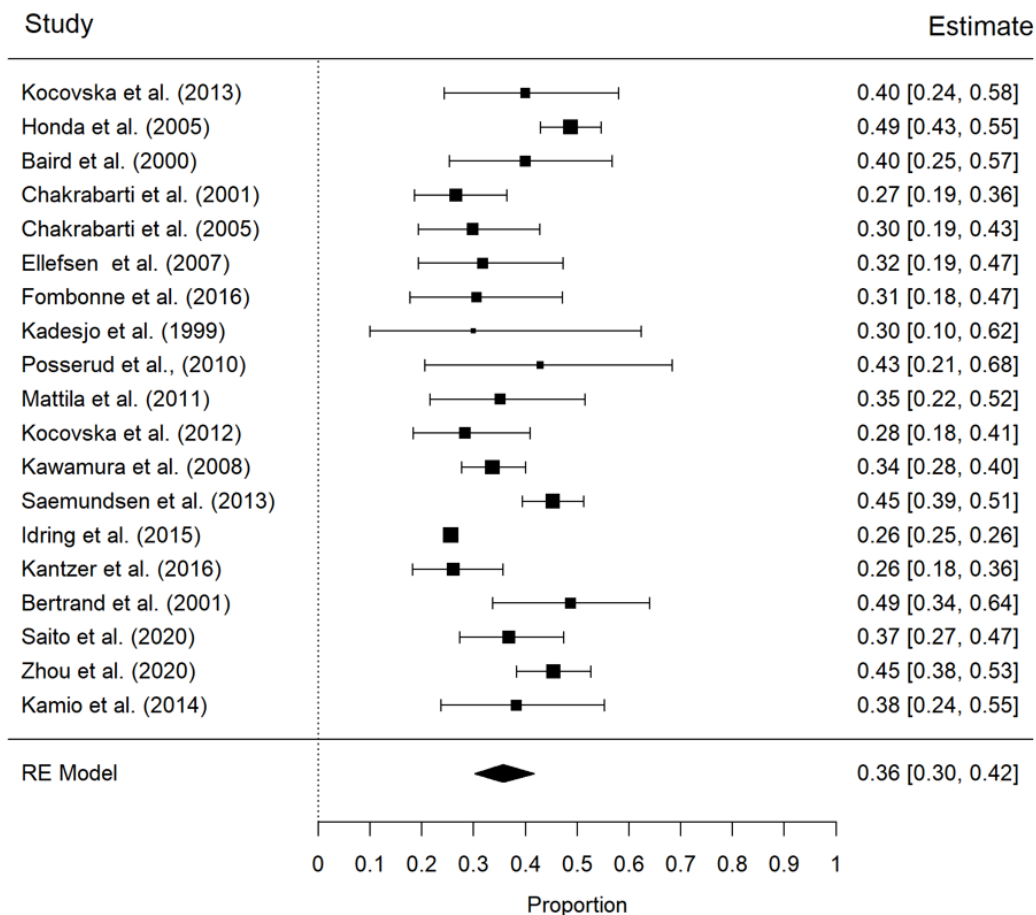

Note: Citations<sup>5-10,13-25</sup>

**Figure S6: Forest plot of the meta-analysis of the proportion of autistic persons without ID that present with borderline ID**

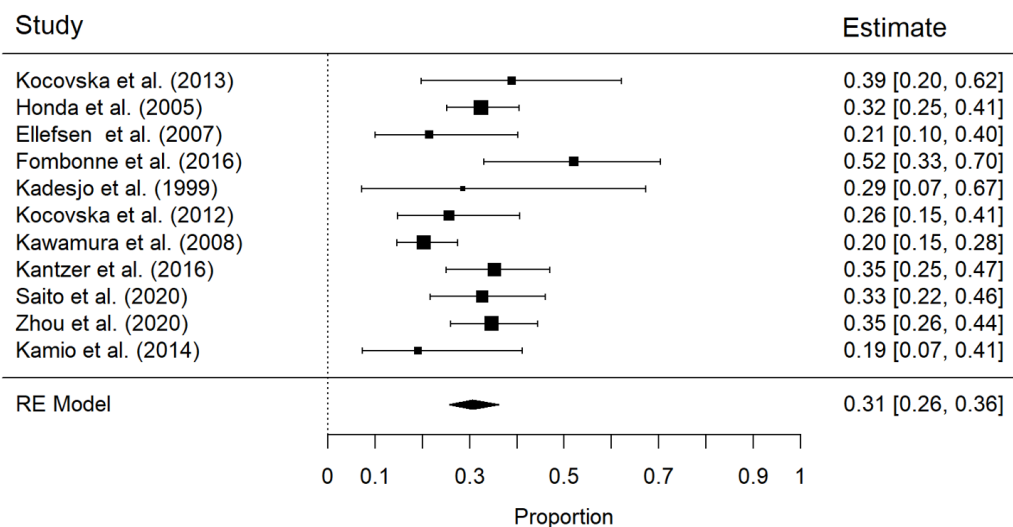

Note: Citations<sup>7-9,13,14,16,18,21,23-25</sup>

**Figure S7: Forest plot of the meta-analysis of the proportion of autistic persons with ID that present with mild ID**

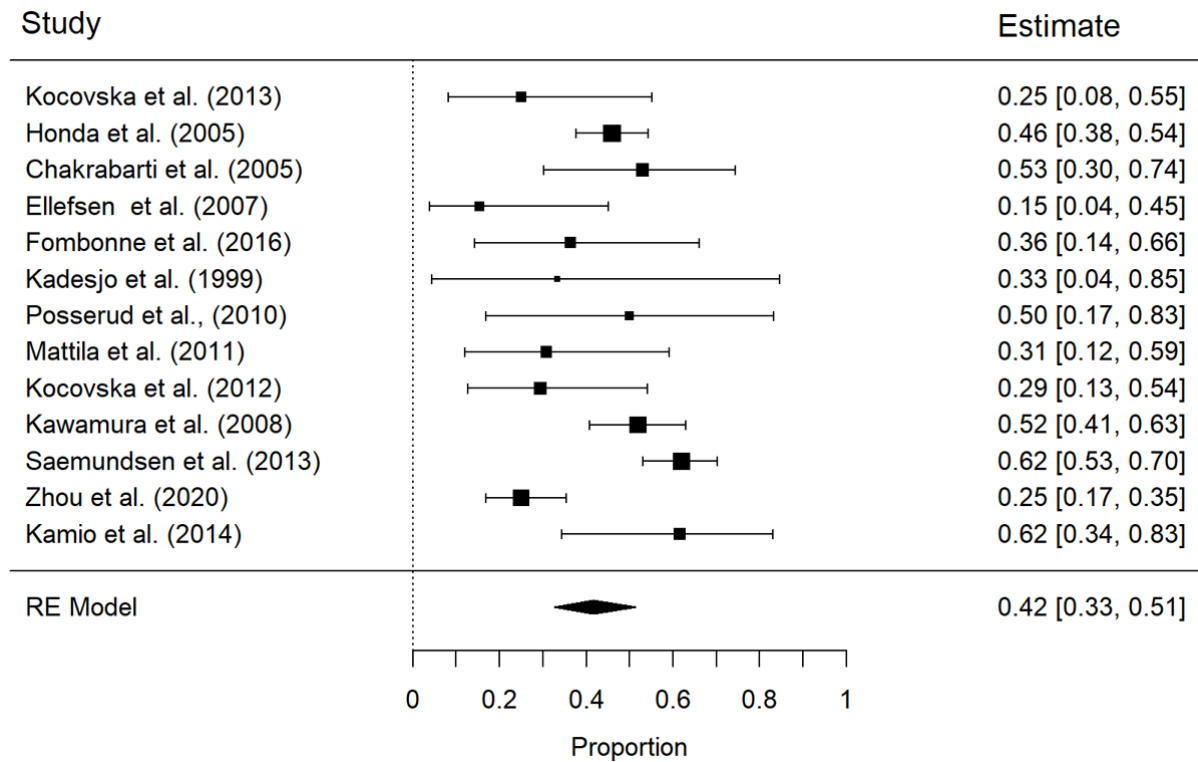

Note: Citations<sup>6-10,13,14,16-19,24,25</sup>

**Figure S8: Forest plot of the meta-analysis of the proportion of autistic persons with moderate, severe, or profound ID that present with moderate ID**

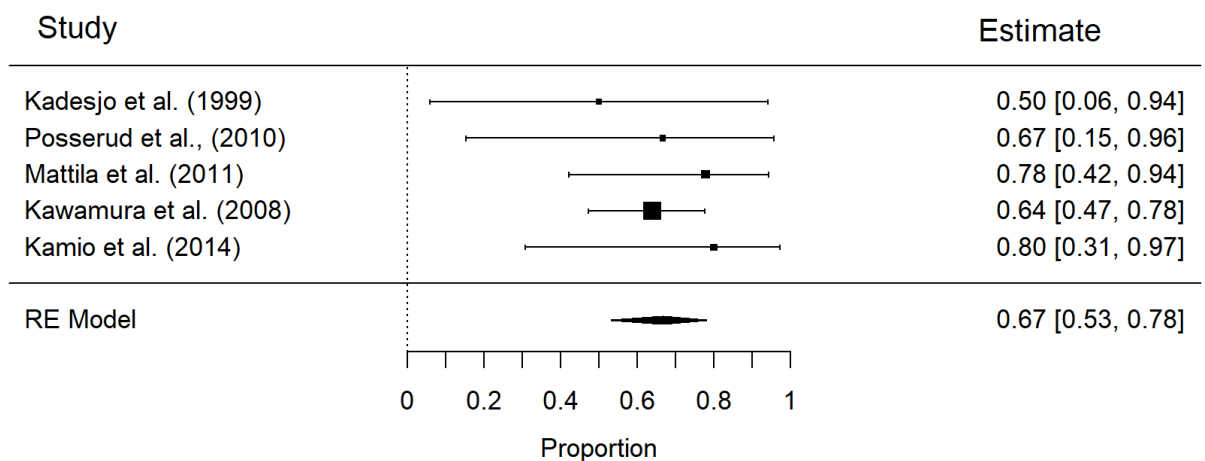

Note: Citations<sup>7,10,17,18,25</sup>

**Figure S9: Forest plot of the meta-analysis of the proportion of autistic persons with severe or profound ID that present with severe ID**

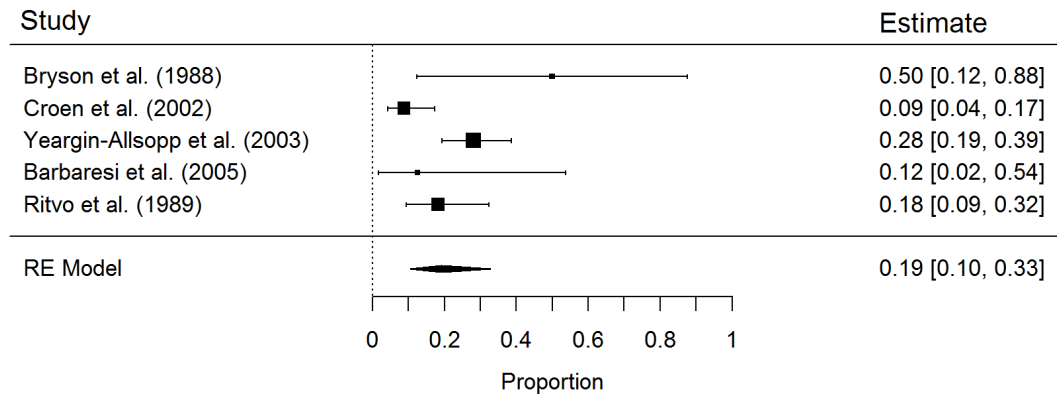

Note: Citations<sup>26-30</sup>

**Figure S10: Forest plot of the meta-analysis of the proportion of autistic persons that meet criteria for DSM-IV autistic disorder**

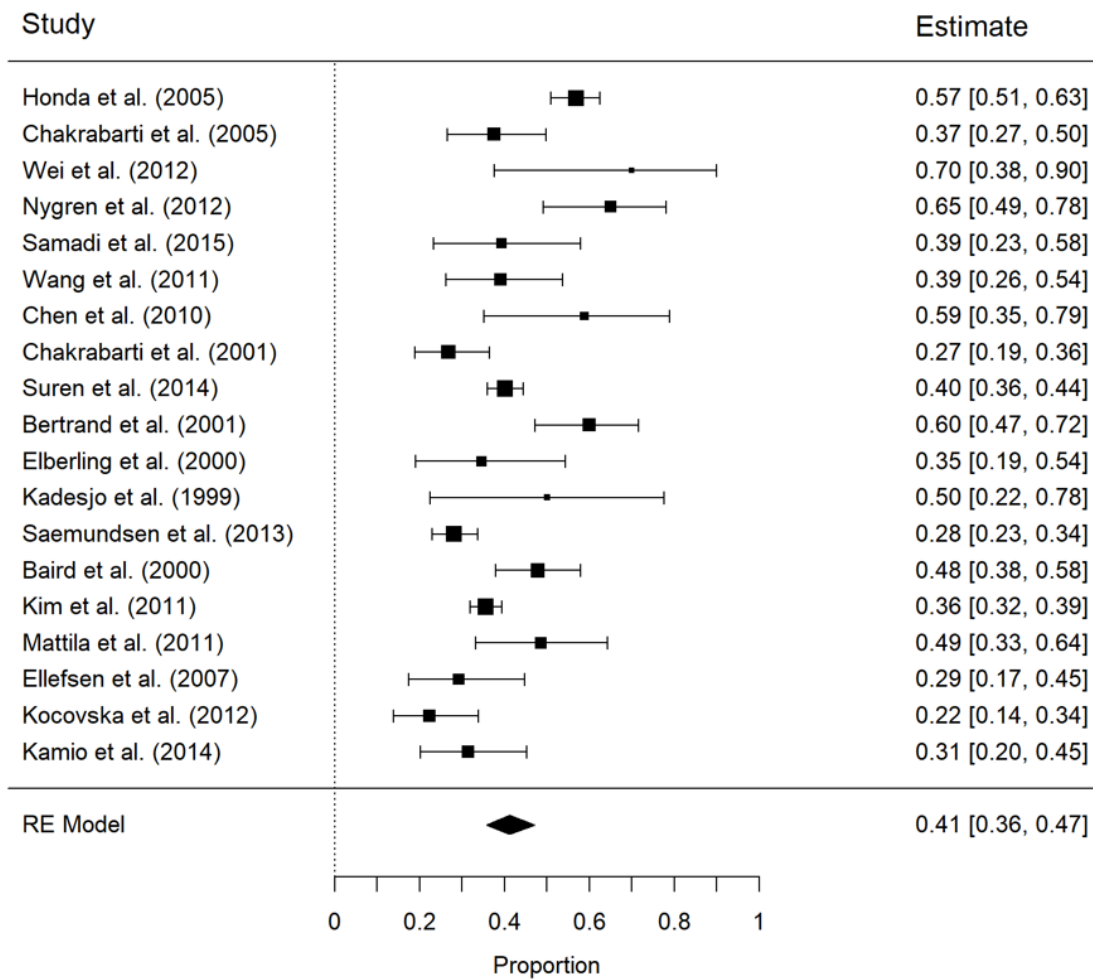

Note: Citations<sup>5-10,14,15,19,22,25,31-38</sup>

**Table S1: Guidelines for Accurate and Transparent Health Estimates Reporting (GATHER) checklist**

| Item #                                                                                                | Checklist item                                                                                                                                                                                                                                                                                                                                                                            | Location                                                                                       |
|-------------------------------------------------------------------------------------------------------|-------------------------------------------------------------------------------------------------------------------------------------------------------------------------------------------------------------------------------------------------------------------------------------------------------------------------------------------------------------------------------------------|------------------------------------------------------------------------------------------------|
| <b>Objectives and funding</b>                                                                         |                                                                                                                                                                                                                                                                                                                                                                                           |                                                                                                |
| 1                                                                                                     | Define the indicator(s), populations (including age, sex, and geographic entities), and time period(s) for which estimates were made.                                                                                                                                                                                                                                                     | Method (first paragraph)                                                                       |
| 2                                                                                                     | List the funding sources for the work.                                                                                                                                                                                                                                                                                                                                                    | Acknowledgements                                                                               |
| <b>Data Inputs</b>                                                                                    |                                                                                                                                                                                                                                                                                                                                                                                           |                                                                                                |
| <i>For all data inputs from multiple sources that are synthesized as part of the study:</i>           |                                                                                                                                                                                                                                                                                                                                                                                           |                                                                                                |
| 3                                                                                                     | Describe how the data were identified and how the data were accessed.                                                                                                                                                                                                                                                                                                                     | Method: <i>Search Strategy</i>                                                                 |
| 4                                                                                                     | Specify the inclusion and exclusion criteria. Identify all ad-hoc exclusions.                                                                                                                                                                                                                                                                                                             | Method: <i>Inclusion criteria and data extraction</i>                                          |
| 5                                                                                                     | Provide information on all included data sources and their main characteristics. For each data source used, report reference information or contact name/institution, population represented, data collection method, year(s) of data collection, sex and age range, diagnostic criteria or measurement method, and sample size, as relevant.                                             | Results<br><i>Reference to GBD 2021 Data Input Sources Tool.</i>                               |
| 6                                                                                                     | Identify and describe any categories of input data that have potentially important biases (e.g., based on characteristics listed in item 5).                                                                                                                                                                                                                                              | Method: <i>Prevalence estimation</i><br>Appendix: <i>Section 1.1.</i>                          |
| <i>For data inputs that contribute to the analysis but were not synthesized as part of the study:</i> |                                                                                                                                                                                                                                                                                                                                                                                           |                                                                                                |
| 7                                                                                                     | Describe and give sources for any other data inputs.                                                                                                                                                                                                                                                                                                                                      | N/A                                                                                            |
| <i>For all data inputs:</i>                                                                           |                                                                                                                                                                                                                                                                                                                                                                                           |                                                                                                |
| 8                                                                                                     | Provide all data inputs in a file format from which data can be efficiently extracted (e.g., a spreadsheet rather than a PDF), including all relevant meta-data listed in item 5. For any data inputs that cannot be shared because of ethical or legal reasons, such as third-party ownership, provide a contact name or the name of the institution that retains the right to the data. | <i>Reference to GBD 2021 Data Input Sources Tool which provides spreadsheet of input data.</i> |
| <b>Data analysis</b>                                                                                  |                                                                                                                                                                                                                                                                                                                                                                                           |                                                                                                |
| 9                                                                                                     | Provide a conceptual overview of the data analysis method. A diagram may be helpful.                                                                                                                                                                                                                                                                                                      | Figure S1                                                                                      |

|                               |                                                                                                                                                                                                                                                                         |                                                                                                                                                                                                                                                                                                                                                                                                               |
|-------------------------------|-------------------------------------------------------------------------------------------------------------------------------------------------------------------------------------------------------------------------------------------------------------------------|---------------------------------------------------------------------------------------------------------------------------------------------------------------------------------------------------------------------------------------------------------------------------------------------------------------------------------------------------------------------------------------------------------------|
| 10                            | Provide a detailed description of all steps of the analysis, including mathematical formulae. This description should cover, as relevant, data cleaning, data pre-processing, data adjustments and weighting of data sources, and mathematical or statistical model(s). | <p>Method: <i>Estimation of epidemiology</i><br/> Method: <i>Estimation of severity distribution</i><br/> Method: <i>Estimation of disability weights</i><br/> Method: <i>Estimation of disability-adjusted life years</i><br/> Appendix: <i>Section 1.1.</i><br/> Appendix: <i>Section 1.2.</i><br/> Appendix: <i>Section 1.3.</i><br/> Appendix: <i>Section 1.4.</i><br/> Appendix: <i>Section 1.5.</i></p> |
| 11                            | Describe how candidate models were evaluated and how the final model(s) were selected.                                                                                                                                                                                  | <p>Method: <i>Estimation of epidemiology</i><br/> Method: <i>Estimation of severity distribution</i><br/> Method: <i>Estimation of disability weights</i><br/> Method: <i>Estimation of disability-adjusted life years</i><br/> Appendix: <i>Section 1.1.</i><br/> Appendix: <i>Section 1.2.</i><br/> Appendix: <i>Section 1.3.</i><br/> Appendix: <i>Section 1.4.</i><br/> Appendix: <i>Section 1.5.</i></p> |
| 12                            | Provide the results of an evaluation of model performance, if done, as well as the results of any relevant sensitivity analysis.                                                                                                                                        | N/A                                                                                                                                                                                                                                                                                                                                                                                                           |
| 13                            | Describe methods for calculating uncertainty of the estimates. State which sources of uncertainty were, and were not, accounted for in the uncertainty analysis.                                                                                                        | Method (first paragraph)                                                                                                                                                                                                                                                                                                                                                                                      |
| 14                            | State how analytic or statistical source code used to generate estimates can be accessed.                                                                                                                                                                               | <i>Reference to GBD 2021 statistical code page</i>                                                                                                                                                                                                                                                                                                                                                            |
| <b>Results and Discussion</b> |                                                                                                                                                                                                                                                                         |                                                                                                                                                                                                                                                                                                                                                                                                               |
| 15                            | Provide published estimates in a file format from which data can be efficiently extracted.                                                                                                                                                                              | <i>Reference to GBD 2021 results tool</i>                                                                                                                                                                                                                                                                                                                                                                     |
| 16                            | Report a quantitative measure of the uncertainty of the estimates (e.g. uncertainty intervals).                                                                                                                                                                         | <i>All estimates are provided with uncertainty intervals</i>                                                                                                                                                                                                                                                                                                                                                  |
| 17                            | Interpret results in light of existing evidence. If updating a previous set of estimates, describe the reasons for changes in estimates.                                                                                                                                | Discussion                                                                                                                                                                                                                                                                                                                                                                                                    |
| 18                            | Discuss limitations of the estimates. Include a discussion of any modelling assumptions or data limitations that affect interpretation of the estimates.                                                                                                                | Discussion                                                                                                                                                                                                                                                                                                                                                                                                    |

**Table S2: Search strings used in electronic databases**

| Database | Search string                                                                                                                                                                                                                                                                                                                                                                                                                                                                                                                                                                     |
|----------|-----------------------------------------------------------------------------------------------------------------------------------------------------------------------------------------------------------------------------------------------------------------------------------------------------------------------------------------------------------------------------------------------------------------------------------------------------------------------------------------------------------------------------------------------------------------------------------|
| PubMed   | <p>(((((autis*[Title/Abstract]) OR asperger*[Title/Abstract]) OR ((pervasive[Title/Abstract]) AND disorder*[Title/Abstract]))) OR "Child Development Disorders, Pervasive"[Mesh])) AND</p> <p>((((((((((prevalen*[Title/Abstract]) OR mortalit*[Title/Abstract]) OR death*[Title/Abstract]) OR inciden*[Title/Abstract]) OR remission[Title/Abstract]) OR duration[Title/Abstract]) OR remit*[Title/Abstract]) OR epidemiolog*[Title/Abstract]) OR "Prevalence"[Mesh]) OR "Mortality"[Mesh]) OR "Incidence"[Mesh]) OR "Epidemiology"[Mesh:NoExp]) OR "Morbidity"[Mesh:NoExp])</p> |
| Embase   | <p>(autis*:ab,ti OR asperger*:ab,ti OR (pervasive:ab,ti AND disorder*:ab,ti) OR 'autism'/exp) AND 'human'/de AND (prevalen*:ab,ti OR mortalit*:ab,ti OR death*:ab,ti OR inciden*:ab,ti OR remission:ab,ti OR duration:ab,ti OR remit*:ab,ti OR epidemiolog*:ab,ti OR 'prevalence'/exp OR 'epidemiology'/exp OR 'remission'/exp) AND [embase]/lim NOT [medline]/lim AND ('article'/it OR 'article in press'/it)</p>                                                                                                                                                                |
| PsycINFO | <p>(TI autis* OR AB autis* OR TI asperger* OR AB asperger* OR ((TI pervasive OR AB pervasive) AND (TI disorder* OR AB disorder*)) OR DE "Autism Spectrum Disorders" ) AND (TI prevalen* OR AB prevalen* OR TI mortalit* OR AB mortalit* OR TI death* OR AB death* OR TI inciden* OR AB inciden* OR TI remission OR AB remission OR TI duration OR AB duration OR TI remit* OR AB remit* OR TI epidemiolog* OR AB epidemiolog* OR DE "Mortality Rate" OR DE "Epidemiology" OR DE "Morbidity" OR DE "Remission (Disorders)" )</p>                                                   |

**Table S3: Preferred Reporting Items for Systematic Reviews and Meta-Analyses (PRISMA) checklist**

| Section and Topic             | Item # | Checklist item                                                                                                                                                                                                                                                                                       | Location where item is reported                                                                                                             |
|-------------------------------|--------|------------------------------------------------------------------------------------------------------------------------------------------------------------------------------------------------------------------------------------------------------------------------------------------------------|---------------------------------------------------------------------------------------------------------------------------------------------|
| <b>TITLE</b>                  |        |                                                                                                                                                                                                                                                                                                      |                                                                                                                                             |
| Title                         | 1      | Identify the report as a systematic review.                                                                                                                                                                                                                                                          | <i>The title instead reflects the focus of this study, which was to report the results from the Global Burden of Disease Study 2021.</i>    |
| <b>ABSTRACT</b>               |        |                                                                                                                                                                                                                                                                                                      |                                                                                                                                             |
| Abstract                      | 2      | See the PRISMA 2020 for Abstracts checklist.                                                                                                                                                                                                                                                         | <i>The abstract instead reflects the focus of this study, which was to report the results from the Global Burden of Disease Study 2021.</i> |
| <b>INTRODUCTION</b>           |        |                                                                                                                                                                                                                                                                                                      |                                                                                                                                             |
| Rationale                     | 3      | Describe the rationale for the review in the context of existing knowledge.                                                                                                                                                                                                                          | Introduction                                                                                                                                |
| Objectives                    | 4      | Provide an explicit statement of the objective(s) or question(s) the review addresses.                                                                                                                                                                                                               | Introduction                                                                                                                                |
| <b>METHODS</b>                |        |                                                                                                                                                                                                                                                                                                      |                                                                                                                                             |
| Eligibility criteria          | 5      | Specify the inclusion and exclusion criteria for the review and how studies were grouped for the syntheses.                                                                                                                                                                                          | Method: <i>Inclusion criteria and data extraction</i>                                                                                       |
| Information sources           | 6      | Specify all databases, registers, websites, organisations, reference lists and other sources searched or consulted to identify studies. Specify the date when each source was last searched or consulted.                                                                                            | Method: <i>Search Strategy</i>                                                                                                              |
| Search strategy               | 7      | Present the full search strategies for all databases, registers and websites, including any filters and limits used.                                                                                                                                                                                 | Method: <i>Search Strategy</i><br>Table S2                                                                                                  |
| Selection process             | 8      | Specify the methods used to decide whether a study met the inclusion criteria of the review, including how many reviewers screened each record and each report retrieved, whether they worked independently, and if applicable, details of automation tools used in the process.                     | Method: <i>Search Strategy</i>                                                                                                              |
| Data collection process       | 9      | Specify the methods used to collect data from reports, including how many reviewers collected data from each report, whether they worked independently, any processes for obtaining or confirming data from study investigators, and if applicable, details of automation tools used in the process. | Method: <i>Search Strategy</i><br>Method: <i>Inclusion criteria and data extraction</i>                                                     |
| Data items                    | 10a    | List and define all outcomes for which data were sought. Specify whether all results that were compatible with each outcome domain in each study were sought (e.g. for all measures, time points, analyses), and if not, the methods used to decide which results to collect.                        | Method: <i>Inclusion criteria and data extraction</i>                                                                                       |
|                               | 10b    | List and define all other variables for which data were sought (e.g. participant and intervention characteristics, funding sources). Describe any assumptions made about any missing or unclear information.                                                                                         | Method: <i>Inclusion criteria and data extraction</i>                                                                                       |
| Study risk of bias assessment | 11     | Specify the methods used to assess risk of bias in the included studies, including details of the tool(s) used, how many reviewers assessed each study and whether they worked independently, and if applicable, details of automation tools used in the process.                                    | Method: <i>Estimation of epidemiology</i><br>Appendix: <i>Section 1.1.</i>                                                                  |
| Effect measures               | 12     | Specify for each outcome the effect measure(s) (e.g. risk ratio, mean difference) used in the synthesis or presentation of results.                                                                                                                                                                  | Method: <i>Estimation of epidemiology</i>                                                                                                   |
| Synthesis methods             | 13a    | Describe the processes used to decide which studies were eligible for each synthesis (e.g. tabulating the study intervention characteristics and comparing                                                                                                                                           | Method: <i>Inclusion criteria and data</i>                                                                                                  |



| Section and Topic             | Item # | Checklist item                                                                                                                                                                                                                                              | Location where item is reported                                                                                                                                                                                                                                                               |
|-------------------------------|--------|-------------------------------------------------------------------------------------------------------------------------------------------------------------------------------------------------------------------------------------------------------------|-----------------------------------------------------------------------------------------------------------------------------------------------------------------------------------------------------------------------------------------------------------------------------------------------|
|                               |        | against the planned groups for each synthesis (item #5)).                                                                                                                                                                                                   | <i>extraction</i>                                                                                                                                                                                                                                                                             |
|                               | 13b    | Describe any methods required to prepare the data for presentation or synthesis, such as handling of missing summary statistics, or data conversions.                                                                                                       | Method: <i>Estimation of epidemiology</i><br>Appendix: <i>Section 1.1.</i>                                                                                                                                                                                                                    |
|                               | 13c    | Describe any methods used to tabulate or visually display results of individual studies and syntheses.                                                                                                                                                      | N/A                                                                                                                                                                                                                                                                                           |
|                               | 13d    | Describe any methods used to synthesize results and provide a rationale for the choice(s). If meta-analysis was performed, describe the model(s), method(s) to identify the presence and extent of statistical heterogeneity, and software package(s) used. | Method: <i>Estimation of epidemiology</i>                                                                                                                                                                                                                                                     |
|                               | 13e    | Describe any methods used to explore possible causes of heterogeneity among study results (e.g. subgroup analysis, meta-regression).                                                                                                                        | Method: <i>Estimation of epidemiology</i><br>Appendix: <i>Section 1.1.</i>                                                                                                                                                                                                                    |
|                               | 13f    | Describe any sensitivity analyses conducted to assess robustness of the synthesized results.                                                                                                                                                                | N/A                                                                                                                                                                                                                                                                                           |
| Reporting bias assessment     | 14     | Describe any methods used to assess risk of bias due to missing results in a synthesis (arising from reporting biases).                                                                                                                                     | Method: <i>Inclusion criteria and data extraction</i>                                                                                                                                                                                                                                         |
| Certainty assessment          | 15     | Describe any methods used to assess certainty (or confidence) in the body of evidence for an outcome.                                                                                                                                                       | Method (first paragraph)                                                                                                                                                                                                                                                                      |
| <b>RESULTS</b>                |        |                                                                                                                                                                                                                                                             |                                                                                                                                                                                                                                                                                               |
| Study selection               | 16a    | Describe the results of the search and selection process, from the number of records identified in the search to the number of studies included in the review, ideally using a flow diagram.                                                                | Results<br>Figure S3                                                                                                                                                                                                                                                                          |
|                               | 16b    | Cite studies that might appear to meet the inclusion criteria, but which were excluded, and explain why they were excluded.                                                                                                                                 | N/A                                                                                                                                                                                                                                                                                           |
| Study characteristics         | 17     | Cite each included study and present its characteristics.                                                                                                                                                                                                   | <i>Reference to GBD 2021 Data Input Sources Tool which provides spreadsheet of input data.</i>                                                                                                                                                                                                |
| Risk of bias in studies       | 18     | Present assessments of risk of bias for each included study.                                                                                                                                                                                                | Method: <i>Estimation of epidemiology</i><br>Appendix: <i>Section 1.1.</i><br><i>Risk of methodological bias was considered within the framework of the bias corrections applied.</i>                                                                                                         |
| Results of individual studies | 19     | For all outcomes, present, for each study: (a) summary statistics for each group (where appropriate) and (b) an effect estimate and its precision (e.g. confidence/credible interval), ideally using structured tables or plots.                            | <i>All estimates are provided with uncertainty intervals</i>                                                                                                                                                                                                                                  |
| Results of syntheses          | 20a    | For each synthesis, briefly summarise the characteristics and risk of bias among contributing studies.                                                                                                                                                      | Results<br><i>Reference to GBD 2021 Data Input Sources Tool which provides spreadsheet of input data.</i><br>Appendix: <i>Section 1.1.</i><br><i>Information on study methodology was extracted and assessed, and the purpose of the meta-regressions in Appendix: Section 1.1. to adjust</i> |

| Section and Topic                              | Item # | Checklist item                                                                                                                                                                                                                                                                       | Location where item is reported                                                                                                             |
|------------------------------------------------|--------|--------------------------------------------------------------------------------------------------------------------------------------------------------------------------------------------------------------------------------------------------------------------------------------|---------------------------------------------------------------------------------------------------------------------------------------------|
|                                                |        |                                                                                                                                                                                                                                                                                      | <i>estimates for bias prior to analysis.</i>                                                                                                |
|                                                | 20b    | Present results of all statistical syntheses conducted. If meta-analysis was done, present for each the summary estimate and its precision (e.g. confidence/credible interval) and measures of statistical heterogeneity. If comparing groups, describe the direction of the effect. | Results<br>Appendix: <i>Section 1.1.</i><br>Appendix: <i>Section 1.3.</i><br>Appendix: <i>Section 1.4.</i><br>Appendix: <i>Section 1.5.</i> |
|                                                | 20c    | Present results of all investigations of possible causes of heterogeneity among study results.                                                                                                                                                                                       | Results<br>Appendix: <i>Section 1.1.</i>                                                                                                    |
|                                                | 20d    | Present results of all sensitivity analyses conducted to assess the robustness of the synthesized results.                                                                                                                                                                           | N/A                                                                                                                                         |
| Reporting biases                               | 21     | Present assessments of risk of bias due to missing results (arising from reporting biases) for each synthesis assessed.                                                                                                                                                              | N/A                                                                                                                                         |
| Certainty of evidence                          | 22     | Present assessments of certainty (or confidence) in the body of evidence for each outcome assessed.                                                                                                                                                                                  | <i>All estimates are provided with uncertainty intervals</i>                                                                                |
| <b>DISCUSSION</b>                              |        |                                                                                                                                                                                                                                                                                      |                                                                                                                                             |
| Discussion                                     | 23a    | Provide a general interpretation of the results in the context of other evidence.                                                                                                                                                                                                    | Discussion                                                                                                                                  |
|                                                | 23b    | Discuss any limitations of the evidence included in the review.                                                                                                                                                                                                                      | Discussion                                                                                                                                  |
|                                                | 23c    | Discuss any limitations of the review processes used.                                                                                                                                                                                                                                | Discussion                                                                                                                                  |
|                                                | 23d    | Discuss implications of the results for practice, policy, and future research.                                                                                                                                                                                                       | Discussion                                                                                                                                  |
| <b>OTHER INFORMATION</b>                       |        |                                                                                                                                                                                                                                                                                      |                                                                                                                                             |
| Registration and protocol                      | 24a    | Provide registration information for the review, including register name and registration number, or state that the review was not registered.                                                                                                                                       | PROSPERO registration:<br>CRD42021257501                                                                                                    |
|                                                | 24b    | Indicate where the review protocol can be accessed, or state that a protocol was not prepared.                                                                                                                                                                                       | Protocol is available on PROSPERO                                                                                                           |
|                                                | 24c    | Describe and explain any amendments to information provided at registration or in the protocol.                                                                                                                                                                                      | Revisions to PROSPERO registration reflect name changes to the GBD iteration, team members, and funding sources                             |
| Support                                        | 25     | Describe sources of financial or non-financial support for the review, and the role of the funders or sponsors in the review.                                                                                                                                                        | Acknowledgements                                                                                                                            |
| Competing interests                            | 26     | Declare any competing interests of review authors.                                                                                                                                                                                                                                   | Declarations of interest                                                                                                                    |
| Availability of data, code and other materials | 27     | Report which of the following are publicly available and where they can be found: template data collection forms; data extracted from included studies; data used for all analyses; analytic code; any other materials used in the review.                                           | Results<br><i>Reference to GBD 2021 Data Input Sources Tool</i>                                                                             |

**Table S4: Lay descriptions and disability weights for the health states informing autism spectrum sequelae in the GBD 2021 Study**

| Health state                                          | Lay description                                                                                                                                                                                                                           | Disability weight (95% UI) |
|-------------------------------------------------------|-------------------------------------------------------------------------------------------------------------------------------------------------------------------------------------------------------------------------------------------|----------------------------|
| Autism                                                | Has severe problems interacting with others and difficulty understanding simple questions or directions. The person has great difficulty with basic daily activities and becomes distressed by any change in routine.                     | 0.262 (0.176–0.365)        |
| Asperger’s syndrome & other autism spectrum disorders | Has difficulty interacting with other people and is slow to understand or respond to questions. The person is often preoccupied with one thing and has some difficulty with basic daily activities.                                       | 0.104 (0.071–0.147)        |
| Intellectual disability, borderline                   | Is slow in learning at school. As an adult, the person has some difficulty doing complex or unfamiliar tasks but otherwise functions independently.                                                                                       | 0.011 (0.005–0.020)        |
| Intellectual disability, mild                         | Has low intelligence and is slow in learning at school. As an adult, the person can live independently, but often needs help to raise children and can only work at simple supervised jobs.                                               | 0.043 (0.026–0.064)        |
| Intellectual disability, moderate                     | Has low intelligence, and is slow in learning to speak and to do even simple tasks. As an adult, the person requires a lot of support to live independently and raise children. The person can only work at the simplest supervised jobs. | 0.100 (0.066–0.142)        |
| Intellectual disability, severe                       | Has very low intelligence and cannot speak more than a few words, needs constant supervision and help with most daily activities, and can do only the simplest tasks.                                                                     | 0.160 (0.107–0.226)        |
| Intellectual disability, profound                     | Has very low intelligence, has almost no language, and does not understand even the most basic requests or instructions. The person requires constant supervision and help for all activities.                                            | 0.200 (0.133–0.283)        |

**Table S5: Age-standardised prevalence of ASD per 100 000 persons by location and sex, 2021**

| Location                                                | Both (95% UI)               | Female (95% UI)            | Male (95% UI)                 |
|---------------------------------------------------------|-----------------------------|----------------------------|-------------------------------|
| <b>Global</b>                                           | <b>788·3 (663·8-927·2)</b>  | <b>508·1 (424·6-604·3)</b> | <b>1064·7 (898·5-1245·7)</b>  |
| <b>Central Europe, Eastern Europe, and Central Asia</b> | <b>927·5 (778·5-1095·3)</b> | <b>644·2 (538·2-764·5)</b> | <b>1218·6 (1021·9-1440·2)</b> |
| <b>Central Asia</b>                                     | <b>886·0 (744·2-1044·4)</b> | <b>621·5 (517·0-731·8)</b> | <b>1154·4 (971·2-1363·8)</b>  |
| Armenia                                                 | 922·0 (766·6-1090·5)        | 644·7 (534·4-773·4)        | 1204·2 (990·9-1435·4)         |
| Azerbaijan                                              | 893·0 (745·1-1051·2)        | 625·2 (514·4-743·0)        | 1154·9 (952·7-1373·4)         |
| Georgia                                                 | 910·7 (760·4-1082·5)        | 636·5 (526·1-757·9)        | 1185·6 (983·0-1422·0)         |
| Kazakhstan                                              | 897·7 (752·8-1064·9)        | 630·2 (520·8-766·7)        | 1180·0 (978·9-1405·8)         |
| Kyrgyzstan                                              | 888·8 (746·0-1060·8)        | 623·7 (513·5-753·1)        | 1163·5 (959·8-1387·3)         |
| Mongolia                                                | 861·3 (726·4-1027·4)        | 607·3 (504·8-722·6)        | 1124·8 (937·7-1351·1)         |
| Tajikistan                                              | 866·8 (726·9-1023·6)        | 608·4 (500·9-733·1)        | 1119·8 (936·6-1327·2)         |
| Turkmenistan                                            | 884·6 (740·3-1043·2)        | 615·7 (507·0-734·8)        | 1143·6 (955·7-1350·4)         |
| Uzbekistan                                              | 879·4 (733·2-1035·4)        | 616·1 (506·8-742·6)        | 1144·3 (950·1-1370·2)         |
| <b>Central Europe</b>                                   | <b>964·4 (810·0-1140·6)</b> | <b>662·3 (552·2-785·0)</b> | <b>1263·3 (1058·4-1489·7)</b> |
| Albania                                                 | 944·0 (781·6-1112·3)        | 645·2 (530·5-783·0)        | 1231·3 (1023·8-1468·1)        |
| Bosnia and Herzegovina                                  | 972·0 (806·8-1150·0)        | 669·7 (552·2-810·1)        | 1271·9 (1052·7-1521·6)        |
| Bulgaria                                                | 936·7 (782·9-1115·1)        | 646·0 (532·5-770·8)        | 1223·0 (1011·7-1458·3)        |
| Croatia                                                 | 996·0 (824·9-1186·2)        | 676·3 (559·1-814·3)        | 1313·2 (1081·3-1578·0)        |
| Czechia                                                 | 996·7 (824·2-1172·9)        | 675·8 (553·6-809·8)        | 1311·2 (1088·5-1567·3)        |
| Hungary                                                 | 971·0 (803·5-1153·1)        | 665·4 (545·6-803·5)        | 1279·7 (1066·4-1521·7)        |
| Montenegro                                              | 976·3 (811·1-1150·0)        | 665·1 (550·9-791·8)        | 1283·1 (1062·7-1531·8)        |

| Location                        | Both (95% UI)                 | Female (95% UI)             | Male (95% UI)                 |
|---------------------------------|-------------------------------|-----------------------------|-------------------------------|
| North Macedonia                 | 957.5 (803.0-1136.9)          | 654.9 (537.9-780.7)         | 1246.2 (1049.0-1489.4)        |
| Poland                          | 964.5 (806.7-1144.4)          | 666.0 (552.7-796.1)         | 1263.5 (1060.0-1495.0)        |
| Romania                         | 939.0 (786.0-1105.1)          | 647.3 (533.4-777.2)         | 1227.6 (1023.2-1465.7)        |
| Serbia                          | 968.4 (801.4-1155.4)          | 662.2 (539.9-794.4)         | 1259.8 (1044.6-1506.8)        |
| Slovakia                        | 966.7 (809.0-1150.8)          | 664.2 (546.2-793.1)         | 1267.5 (1048.1-1532.1)        |
| Slovenia                        | 1017.9 (845.7-1224.1)         | 684.6 (565.8-830.5)         | 1338.0 (1102.5-1609.2)        |
| <b>Eastern Europe</b>           | <b>928.5 (779.8-1102.3)</b>   | <b>645.6 (535.4-773.4)</b>  | <b>1226.2 (1031.6-1457.2)</b> |
| Belarus                         | 945.2 (783.5-1128.1)          | 653.8 (534.7-784.2)         | 1250.3 (1043.9-1493.3)        |
| Estonia                         | 964.5 (811.2-1146.7)          | 658.9 (540.8-793.0)         | 1272.7 (1057.4-1530.9)        |
| Latvia                          | 943.2 (778.7-1117.1)          | 650.9 (533.7-776.3)         | 1244.6 (1031.5-1490.3)        |
| Lithuania                       | 944.8 (783.9-1115.8)          | 650.8 (541.5-786.5)         | 1249.6 (1032.5-1488.6)        |
| Republic of Moldova             | 917.9 (766.0-1082.3)          | 636.5 (525.8-761.1)         | 1206.3 (998.2-1447.8)         |
| Russian Federation              | 928.8 (780.0-1100.6)          | 645.8 (536.5-770.2)         | 1227.6 (1028.5-1451.3)        |
| Ukraine                         | 922.3 (770.6-1101.3)          | 642.9 (532.1-767.0)         | 1214.5 (1017.5-1454.2)        |
| <b>High-income</b>              | <b>1090.2 (916.3-1279.3)</b>  | <b>649.8 (543.4-771.1)</b>  | <b>1526.5 (1283.2-1786.5)</b> |
| <b>Australasia</b>              | <b>1191.0 (993.0-1422.7)</b>  | <b>709.4 (586.1-862.2)</b>  | <b>1670.0 (1387.5-2012.1)</b> |
| Australia                       | 1195.4 (996.1-1428.7)         | 711.2 (581.7-865.0)         | 1678.7 (1388.8-2028.0)        |
| New Zealand                     | 1169.2 (969.9-1404.3)         | 700.8 (576.7-841.3)         | 1627.8 (1357.1-1949.0)        |
| <b>High-income Asia Pacific</b> | <b>1559.5 (1311.3-1832.4)</b> | <b>938.8 (790.5-1107.1)</b> | <b>2161.1 (1815.5-2536.3)</b> |
| Brunei Darussalam               | 1370.5 (1153.1-1635.4)        | 834.2 (688.5-997.0)         | 1856.1 (1537.8-2204.7)        |
| Japan                           | 1586.9 (1333.2-1864.1)        | 944.3 (792.8-1119.9)        | 2214.1 (1870.6-2597.1)        |
| Republic of Korea               | 1506.8 (1254.0-1779.2)        | 933.2 (770.4-1112.6)        | 2055.7 (1708.9-2427.4)        |

| Location                         | Both (95% UI)                | Female (95% UI)            | Male (95% UI)                 |
|----------------------------------|------------------------------|----------------------------|-------------------------------|
| Singapore                        | 1487.3 (1250.0-1767.8)       | 891.2 (731.1-1072.2)       | 2065.9 (1732.9-2448.6)        |
| <b>High-income North America</b> | <b>1097.2 (919.2-1296.7)</b> | <b>707.3 (589.5-838.0)</b> | <b>1486.9 (1244.5-1746.3)</b> |
| Canada                           | 1117.9 (930.4-1317.6)        | 717.5 (591.8-861.7)        | 1515.1 (1256.0-1805.5)        |
| Greenland                        | 1016.9 (848.6-1199.3)        | 660.8 (544.1-797.4)        | 1343.5 (1119.7-1607.1)        |
| United States of America         | 1094.8 (920.2-1291.2)        | 706.2 (588.3-836.0)        | 1483.7 (1245.9-1748.4)        |
| <b>Southern Latin America</b>    | <b>1056.5 (885.9-1245.4)</b> | <b>662.3 (548.0-787.7)</b> | <b>1458.7 (1216.8-1729.8)</b> |
| Argentina                        | 1045.7 (867.3-1230.9)        | 657.4 (540.9-788.1)        | 1443.9 (1198.8-1712.9)        |
| Chile                            | 1082.6 (902.8-1277.0)        | 673.8 (554.0-807.8)        | 1493.0 (1248.8-1776.1)        |
| Uruguay                          | 1058.1 (880.2-1268.2)        | 664.7 (551.4-796.7)        | 1464.4 (1209.8-1753.5)        |
| <b>Western Europe</b>            | <b>896.6 (751.6-1054.5)</b>  | <b>477.6 (397.7-572.1)</b> | <b>1309.1 (1099.7-1533.1)</b> |
| Andorra                          | 905.9 (752.9-1077.5)         | 484.5 (395.0-587.6)        | 1303.1 (1082.4-1549.0)        |
| Austria                          | 892.2 (741.1-1069.1)         | 486.1 (398.1-590.0)        | 1287.1 (1065.9-1547.0)        |
| Belgium                          | 885.3 (734.8-1051.9)         | 484.0 (398.7-587.6)        | 1281.5 (1056.5-1525.1)        |
| Cyprus                           | 882.9 (733.7-1048.0)         | 482.9 (397.0-584.1)        | 1281.0 (1058.4-1522.8)        |
| Denmark                          | 946.5 (797.2-1124.2)         | 514.9 (417.0-614.4)        | 1366.3 (1143.1-1620.4)        |
| Finland                          | 828.7 (687.5-990.5)          | 473.3 (390.4-568.1)        | 1173.2 (971.0-1407.7)         |
| France                           | 881.3 (734.9-1049.9)         | 482.0 (395.3-582.3)        | 1283.7 (1064.0-1528.3)        |
| Germany                          | 897.5 (738.7-1071.0)         | 484.4 (400.6-584.8)        | 1289.2 (1053.0-1542.4)        |
| Greece                           | 881.4 (732.5-1056.8)         | 485.4 (397.3-586.6)        | 1278.6 (1057.6-1541.6)        |
| Iceland                          | 1047.3 (875.1-1235.0)        | 564.4 (464.5-665.7)        | 1509.4 (1261.8-1786.7)        |
| Ireland                          | 1071.9 (894.8-1274.4)        | 596.8 (490.0-719.7)        | 1548.1 (1292.1-1850.2)        |
| Israel                           | 795.1 (665.4-944.0)          | 446.8 (365.6-536.6)        | 1140.3 (950.2-1353.7)         |

| Location                           | Both (95% UI)              | Female (95% UI)            | Male (95% UI)               |
|------------------------------------|----------------------------|----------------------------|-----------------------------|
| Italy                              | 999.3 (839.6-1186.0)       | 558.9 (462.6-667.7)        | 1431.6 (1199.2-1699.1)      |
| Luxembourg                         | 901.8 (749.7-1081.9)       | 487.1 (400.5-591.5)        | 1300.6 (1083.4-1559.3)      |
| Malta                              | 898.1 (751.3-1069.8)       | 484.5 (397.1-591.4)        | 1292.9 (1079.4-1546.0)      |
| Monaco                             | 890.6 (744.5-1062.5)       | 481.5 (396.4-581.7)        | 1305.2 (1079.6-1567.0)      |
| Netherlands                        | 899.6 (739.8-1073.2)       | 486.3 (397.2-583.3)        | 1305.5 (1082.7-1558.2)      |
| Norway                             | 808.3 (677.1-963.1)        | 444.6 (367.0-532.4)        | 1155.5 (971.0-1370.1)       |
| Portugal                           | 861.8 (718.3-1019.8)       | 476.3 (389.8-570.1)        | 1257.4 (1047.4-1507.6)      |
| San Marino                         | 890.8 (739.0-1063.6)       | 485.3 (398.8-584.6)        | 1303.7 (1078.8-1550.8)      |
| Spain                              | 1024.7 (863.8-1204.3)      | 451.7 (376.4-538.1)        | 1591.6 (1331.8-1870.9)      |
| Sweden                             | 1016.7 (839.5-1216.8)      | 501.7 (397.9-627.3)        | 1508.5 (1250.3-1803.0)      |
| Switzerland                        | 902.3 (749.2-1073.8)       | 485.2 (398.4-585.5)        | 1304.9 (1076.5-1560.6)      |
| United Kingdom                     | 750.8 (631.6-890.3)        | 404.1 (332.7-483.9)        | 1099.8 (923.1-1298.4)       |
| <b>Latin America and Caribbean</b> | <b>689.5 (579.7-820.3)</b> | <b>464.9 (386.3-557.9)</b> | <b>920.2 (775.0-1087.0)</b> |
| <b>Andean Latin America</b>        | <b>684.3 (571.6-814.1)</b> | <b>464.5 (385.3-555.9)</b> | <b>902.4 (751.0-1069.7)</b> |
| Bolivia (Plurinational State of)   | 663.1 (555.1-795.5)        | 453.8 (374.6-545.8)        | 872.5 (724.1-1043.4)        |
| Ecuador                            | 682.7 (565.9-813.8)        | 465.8 (385.8-557.8)        | 901.3 (747.6-1075.8)        |
| Peru                               | 691.7 (577.7-826.2)        | 467.0 (384.7-561.3)        | 912.3 (757.3-1086.9)        |
| <b>Caribbean</b>                   | <b>682.5 (572.1-813.8)</b> | <b>464.7 (382.7-558.3)</b> | <b>902.7 (763.6-1069.7)</b> |
| Antigua and Barbuda                | 711.6 (588.0-844.9)        | 482.3 (392.1-583.0)        | 946.2 (786.6-1123.1)        |
| Bahamas                            | 692.9 (572.2-823.3)        | 476.7 (390.4-573.4)        | 921.0 (761.0-1093.3)        |
| Barbados                           | 712.4 (593.8-854.6)        | 482.7 (395.4-581.3)        | 948.7 (789.9-1141.0)        |
| Belize                             | 683.0 (567.1-821.9)        | 467.6 (382.0-567.0)        | 900.7 (744.2-1084.0)        |

| Location                         | Both (95% UI)              | Female (95% UI)            | Male (95% UI)                |
|----------------------------------|----------------------------|----------------------------|------------------------------|
| Bermuda                          | 740.5 (611.9-893.6)        | 492.1 (403.0-593.1)        | 993.2 (818.9-1203.4)         |
| Cuba                             | 723.4 (603.2-859.9)        | 485.0 (396.7-583.8)        | 955.8 (793.5-1133.9)         |
| Dominica                         | 695.0 (582.7-829.6)        | 472.5 (389.4-564.8)        | 908.3 (752.3-1079.5)         |
| Dominican Republic               | 677.1 (565.5-807.5)        | 461.6 (375.7-556.8)        | 889.4 (742.3-1068.3)         |
| Grenada                          | 697.9 (578.4-825.5)        | 472.2 (388.7-571.4)        | 911.7 (754.6-1083.3)         |
| Guyana                           | 663.2 (552.8-789.0)        | 457.4 (379.3-548.8)        | 874.2 (727.6-1040.1)         |
| Haiti                            | 627.0 (522.7-746.2)        | 431.8 (355.1-517.7)        | 831.2 (692.6-988.7)          |
| Jamaica                          | 702.5 (590.2-834.7)        | 476.1 (392.3-569.8)        | 929.9 (780.8-1102.4)         |
| Puerto Rico                      | 731.1 (602.8-877.6)        | 494.4 (404.7-591.3)        | 977.4 (807.0-1168.2)         |
| Saint Kitts and Nevis            | 694.9 (581.7-824.3)        | 472.0 (387.2-567.6)        | 917.1 (765.7-1100.0)         |
| Saint Lucia                      | 702.4 (581.6-837.4)        | 477.2 (389.9-574.1)        | 923.4 (761.7-1101.2)         |
| Saint Vincent and the Grenadines | 693.7 (575.6-825.8)        | 469.5 (385.6-562.9)        | 908.9 (752.4-1079.8)         |
| Suriname                         | 673.7 (559.5-804.7)        | 460.6 (378.3-549.2)        | 889.6 (739.1-1066.8)         |
| Trinidad and Tobago              | 699.2 (585.7-835.9)        | 474.4 (390.3-570.6)        | 919.8 (757.2-1097.9)         |
| United States Virgin Islands     | 709.9 (588.3-848.5)        | 481.5 (394.8-579.3)        | 941.3 (782.3-1126.4)         |
| <b>Central Latin America</b>     | <b>758.6 (639.0-897.8)</b> | <b>510.3 (423.1-611.4)</b> | <b>1017.1 (855.1-1196.5)</b> |
| Colombia                         | 771.8 (640.9-921.5)        | 516.5 (423.3-617.4)        | 1032.7 (857.0-1234.4)        |
| Costa Rica                       | 792.0 (655.2-946.8)        | 532.5 (438.7-642.7)        | 1064.9 (876.9-1276.4)        |
| El Salvador                      | 745.6 (620.6-893.8)        | 508.5 (417.7-608.6)        | 1012.9 (842.9-1213.5)        |
| Guatemala                        | 726.0 (605.5-861.0)        | 494.6 (409.7-593.1)        | 973.5 (807.9-1153.6)         |
| Honduras                         | 727.8 (605.8-864.2)        | 494.0 (407.5-588.5)        | 977.1 (813.4-1165.7)         |
| Mexico                           | 758.5 (641.3-902.8)        | 509.7 (424.2-611.1)        | 1017.3 (859.7-1201.7)        |



| Location                            | Both (95% UI)              | Female (95% UI)            | Male (95% UI)                |
|-------------------------------------|----------------------------|----------------------------|------------------------------|
| Nicaragua                           | 756.1 (627.4-892.4)        | 508.9 (418.1-609.0)        | 1010.5 (835.5-1197.4)        |
| Panama                              | 779.7 (654.4-921.4)        | 516.6 (427.3-620.4)        | 1037.1 (870.0-1229.7)        |
| Venezuela (Bolivarian Republic of)  | 756.7 (634.2-899.5)        | 511.3 (422.7-611.3)        | 1016.5 (845.7-1209.9)        |
| <b>Tropical Latin America</b>       | <b>614.5 (514.7-732.3)</b> | <b>413.4 (340.9-495.8)</b> | <b>820.7 (687.6-974.5)</b>   |
| Brazil                              | 614.1 (514.6-731.9)        | 413.1 (340.4-495.2)        | 820.4 (687.4-973.8)          |
| Paraguay                            | 628.1 (521.4-748.2)        | 421.5 (344.0-509.7)        | 830.2 (687.0-988.0)          |
| <b>North Africa and Middle East</b> | <b>771.8 (648.5-910.7)</b> | <b>524.8 (436.1-624.1)</b> | <b>1001.3 (845.9-1179.2)</b> |
| Afghanistan                         | 703.1 (581.7-839.5)        | 488.0 (403.4-585.1)        | 917.8 (757.1-1094.5)         |
| Algeria                             | 774.6 (644.9-921.9)        | 530.5 (437.3-634.0)        | 1010.7 (840.1-1205.1)        |
| Bahrain                             | 848.4 (703.7-1009.1)       | 545.1 (450.4-661.6)        | 1049.3 (872.7-1251.0)        |
| Egypt                               | 763.7 (639.6-905.8)        | 522.7 (430.9-629.7)        | 987.0 (821.5-1167.5)         |
| Iran (Islamic Republic of)          | 791.2 (662.9-934.0)        | 527.7 (439.2-631.4)        | 1045.7 (875.9-1232.2)        |
| Iraq                                | 709.2 (590.7-852.8)        | 495.4 (407.9-600.2)        | 909.2 (757.3-1098.5)         |
| Jordan                              | 810.0 (672.7-960.5)        | 541.2 (444.0-650.3)        | 1044.1 (859.9-1253.8)        |
| Kuwait                              | 829.5 (685.6-984.3)        | 556.0 (454.3-670.2)        | 1072.6 (890.0-1276.3)        |
| Lebanon                             | 872.4 (724.2-1033.2)       | 610.6 (502.2-729.8)        | 1131.6 (934.4-1360.8)        |
| Libya                               | 769.1 (636.7-915.3)        | 526.4 (434.0-638.2)        | 999.6 (828.9-1193.3)         |
| Morocco                             | 756.2 (634.1-897.5)        | 520.6 (432.3-625.1)        | 987.9 (820.4-1167.9)         |
| Oman                                | 832.9 (687.4-998.6)        | 543.3 (444.5-651.6)        | 1035.7 (855.1-1246.2)        |
| Palestine                           | 782.1 (651.4-934.1)        | 539.1 (441.0-646.2)        | 1017.8 (847.0-1218.2)        |
| Qatar                               | 964.6 (798.0-1145.1)       | 583.3 (479.0-697.6)        | 1173.5 (972.7-1396.9)        |
| Saudi Arabia                        | 817.8 (677.7-975.7)        | 535.8 (442.2-638.3)        | 1027.2 (848.5-1228.3)        |

| Location                                      | Both (95% UI)              | Female (95% UI)            | Male (95% UI)               |
|-----------------------------------------------|----------------------------|----------------------------|-----------------------------|
| Sudan                                         | 737.5 (611.6-879.5)        | 506.5 (416.0-608.2)        | 960.2 (796.1-1151.5)        |
| Syrian Arab Republic                          | 759.0 (630.0-913.0)        | 532.3 (437.0-645.2)        | 1012.8 (838.0-1210.3)       |
| Tunisia                                       | 785.0 (650.9-932.3)        | 540.9 (444.6-648.8)        | 1028.3 (846.0-1226.3)       |
| Türkiye                                       | 786.6 (652.9-931.7)        | 538.7 (445.9-647.0)        | 1030.4 (848.7-1227.3)       |
| United Arab Emirates                          | 840.9 (701.0-999.6)        | 530.7 (436.3-641.9)        | 1014.2 (844.5-1210.2)       |
| Yemen                                         | 726.6 (608.1-859.7)        | 504.0 (420.6-601.1)        | 947.2 (788.8-1134.3)        |
| <b>South Asia</b>                             | <b>686.2 (576.6-802.0)</b> | <b>466.8 (389.9-557.3)</b> | <b>897.0 (753.8-1038.9)</b> |
| Bangladesh                                    | 588.2 (486.7-696.6)        | 388.2 (316.4-466.6)        | 794.2 (654.0-941.2)         |
| Bhutan                                        | 648.1 (540.6-770.4)        | 435.7 (360.0-525.6)        | 846.6 (702.6-1008.6)        |
| India                                         | 708.1 (595.1-831.2)        | 483.7 (404.5-576.2)        | 921.4 (775.6-1073.9)        |
| Nepal                                         | 626.1 (519.4-750.6)        | 431.5 (355.9-523.9)        | 840.9 (695.5-1006.7)        |
| Pakistan                                      | 631.1 (526.6-741.9)        | 427.2 (355.0-512.9)        | 825.4 (687.8-970.5)         |
| <b>Southeast Asia, East Asia, and Oceania</b> | <b>669.2 (560.7-791.5)</b> | <b>373.6 (308.4-447.9)</b> | <b>950.5 (797.1-1122.2)</b> |
| <b>East Asia</b>                              | <b>660.7 (549.4-785.9)</b> | <b>324.6 (267.3-391.9)</b> | <b>972.2 (811.3-1152.9)</b> |
| China                                         | 655.7 (545.1-780.4)        | 318.2 (262.1-384.3)        | 967.9 (807.4-1148.1)        |
| Democratic People's Republic of Korea         | 706.1 (587.1-845.0)        | 427.5 (350.7-520.4)        | 980.8 (809.0-1175.7)        |
| Taiwan (Province of China)                    | 911.1 (752.0-1083.9)       | 587.6 (480.3-714.0)        | 1227.9 (1014.3-1471.6)      |
| <b>Oceania</b>                                | <b>673.2 (566.1-807.0)</b> | <b>433.5 (356.8-523.6)</b> | <b>898.2 (751.4-1078.0)</b> |
| American Samoa                                | 708.9 (588.9-847.7)        | 454.9 (370.2-550.3)        | 952.1 (785.5-1142.0)        |
| Cook Islands                                  | 724.6 (601.4-867.4)        | 463.7 (382.2-554.4)        | 1000.3 (829.4-1199.4)       |
| Fiji                                          | 684.8 (566.4-818.4)        | 445.0 (363.8-533.5)        | 919.1 (762.4-1093.5)        |
| Guam                                          | 726.0 (600.3-871.4)        | 461.2 (375.4-561.1)        | 979.2 (809.6-1178.9)        |

| Location                         | Both (95% UI)              | Female (95% UI)            | Male (95% UI)               |
|----------------------------------|----------------------------|----------------------------|-----------------------------|
| Kiribati                         | 647.3 (537.6-772.5)        | 428.1 (348.7-515.2)        | 879.9 (730.5-1043.6)        |
| Marshall Islands                 | 677.3 (562.0-808.1)        | 438.6 (360.9-527.3)        | 905.3 (748.1-1083.1)        |
| Micronesia (Federated States of) | 683.2 (575.0-804.0)        | 442.9 (363.1-526.6)        | 915.9 (759.3-1093.1)        |
| Nauru                            | 672.3 (560.1-802.9)        | 437.7 (360.8-527.8)        | 908.0 (752.8-1082.8)        |
| Niue                             | 701.6 (584.0-827.2)        | 455.5 (373.9-547.3)        | 941.0 (781.3-1112.3)        |
| Northern Mariana Islands         | 734.2 (611.6-874.8)        | 462.6 (380.0-552.5)        | 979.9 (808.8-1176.8)        |
| Palau                            | 726.7 (601.9-857.4)        | 450.8 (370.9-549.4)        | 950.9 (787.0-1136.6)        |
| Papua New Guinea                 | 669.8 (562.0-804.3)        | 430.0 (352.9-520.8)        | 891.7 (744.8-1069.7)        |
| Samoa                            | 696.9 (580.5-829.9)        | 448.3 (365.1-541.4)        | 932.2 (779.7-1102.1)        |
| Solomon Islands                  | 671.8 (562.7-801.6)        | 436.5 (354.9-529.1)        | 899.2 (745.8-1075.9)        |
| Tokelau                          | 714.5 (598.7-855.6)        | 455.2 (374.3-550.5)        | 961.8 (797.4-1152.8)        |
| Tonga                            | 694.9 (575.6-829.3)        | 451.2 (368.3-547.0)        | 943.4 (778.0-1124.9)        |
| Tuvalu                           | 684.4 (566.4-820.7)        | 437.9 (358.0-527.9)        | 910.8 (750.2-1089.6)        |
| Vanuatu                          | 671.1 (555.5-802.4)        | 439.1 (360.9-524.2)        | 900.3 (739.7-1078.7)        |
| <b>Southeast Asia</b>            | <b>683.0 (574.6-809.7)</b> | <b>458.6 (380.6-551.4)</b> | <b>905.9 (762.1-1069.0)</b> |
| Cambodia                         | 672.4 (560.6-805.8)        | 441.5 (361.5-530.6)        | 913.9 (753.8-1093.4)        |
| Indonesia                        | 647.3 (543.6-769.0)        | 478.4 (397.6-572.9)        | 811.8 (683.8-959.4)         |
| Lao People's Democratic Republic | 668.8 (557.4-802.7)        | 436.0 (358.4-530.1)        | 899.7 (748.8-1073.7)        |
| Malaysia                         | 734.3 (611.9-874.6)        | 467.9 (383.3-563.6)        | 983.6 (815.8-1168.5)        |
| Maldives                         | 765.9 (630.0-912.2)        | 458.1 (375.6-555.1)        | 983.9 (811.6-1183.4)        |
| Mauritius                        | 728.1 (603.1-862.5)        | 466.9 (384.5-559.8)        | 990.3 (818.0-1181.8)        |
| Myanmar                          | 668.8 (555.6-803.0)        | 439.7 (361.8-531.8)        | 913.2 (755.6-1095.0)        |

| Location                          | Both (95% UI)               | Female (95% UI)            | Male (95% UI)                |
|-----------------------------------|-----------------------------|----------------------------|------------------------------|
| Philippines                       | 686.1 (576.4-811.2)         | 446.3 (370.9-535.2)        | 920.3 (774.5-1081.9)         |
| Seychelles                        | 733.9 (607.9-873.3)         | 466.5 (382.8-554.5)        | 974.7 (805.6-1169.4)         |
| Sri Lanka                         | 749.9 (620.3-896.0)         | 466.8 (386.5-559.8)        | 1048.0 (863.0-1246.3)        |
| Thailand                          | 722.2 (597.6-864.5)         | 463.4 (381.4-560.7)        | 989.3 (819.3-1194.8)         |
| Timor-Leste                       | 677.3 (566.1-807.2)         | 440.3 (360.0-529.8)        | 909.6 (756.6-1094.7)         |
| Viet Nam                          | 726.3 (606.3-863.6)         | 421.2 (344.7-508.0)        | 1029.5 (849.9-1223.5)        |
| <b>Sub-Saharan Africa</b>         | <b>890.2 (748.6-1043.1)</b> | <b>628.4 (526.6-743.1)</b> | <b>1164.7 (980.2-1358.6)</b> |
| <b>Central Sub-Saharan Africa</b> | <b>885.4 (739.7-1046.5)</b> | <b>624.5 (517.9-742.2)</b> | <b>1152.0 (963.2-1364.4)</b> |
| Angola                            | 879.2 (741.0-1029.7)        | 626.6 (520.3-751.9)        | 1155.0 (964.6-1366.6)        |
| Central African Republic          | 848.7 (711.7-1026.1)        | 606.8 (497.6-730.6)        | 1105.6 (927.6-1328.6)        |
| Congo                             | 896.3 (750.2-1059.9)        | 630.2 (519.6-751.2)        | 1166.5 (971.8-1378.8)        |
| Democratic Republic of the Congo  | 887.7 (738.2-1055.6)        | 623.8 (514.4-752.9)        | 1151.2 (961.9-1368.7)        |
| Equatorial Guinea                 | 927.4 (773.1-1096.9)        | 637.4 (527.0-772.6)        | 1193.1 (992.4-1421.9)        |
| Gabon                             | 905.4 (756.3-1079.4)        | 641.7 (530.6-771.0)        | 1189.5 (999.2-1417.2)        |
| <b>Eastern Sub-Saharan Africa</b> | <b>893.5 (752.4-1045.2)</b> | <b>629.0 (529.0-744.7)</b> | <b>1165.9 (980.2-1363.2)</b> |
| Burundi                           | 886.5 (737.5-1042.9)        | 619.2 (513.6-740.3)        | 1147.9 (948.7-1358.7)        |
| Comoros                           | 906.9 (757.5-1074.5)        | 636.1 (528.6-762.7)        | 1180.2 (978.4-1395.3)        |
| Djibouti                          | 931.6 (775.9-1106.1)        | 637.1 (525.9-765.9)        | 1182.7 (982.7-1396.7)        |
| Eritrea                           | 886.8 (738.3-1053.8)        | 626.4 (515.7-745.2)        | 1148.6 (957.2-1380.1)        |
| Ethiopia                          | 894.6 (751.9-1053.8)        | 626.5 (525.0-747.0)        | 1159.3 (972.9-1370.9)        |
| Kenya                             | 906.3 (761.4-1061.0)        | 637.3 (533.2-759.2)        | 1181.4 (995.8-1376.5)        |
| Madagascar                        | 889.5 (742.0-1051.7)        | 626.8 (517.9-749.5)        | 1161.7 (969.5-1383.9)        |

| Location                           | Both (95% UI)               | Female (95% UI)            | Male (95% UI)                |
|------------------------------------|-----------------------------|----------------------------|------------------------------|
| Malawi                             | 886.0 (741.6-1048.2)        | 626.7 (522.2-757.6)        | 1164.0 (969.6-1382.5)        |
| Mozambique                         | 872.6 (725.0-1039.0)        | 621.8 (514.3-741.0)        | 1150.5 (961.4-1363.7)        |
| Rwanda                             | 890.7 (742.6-1054.9)        | 629.8 (521.5-753.7)        | 1173.4 (971.8-1394.2)        |
| Somalia                            | 868.1 (726.0-1020.8)        | 612.6 (508.2-733.0)        | 1125.4 (938.5-1339.9)        |
| South Sudan                        | 891.2 (745.9-1060.4)        | 625.5 (518.0-753.4)        | 1160.3 (966.8-1375.1)        |
| Uganda                             | 900.1 (749.7-1067.6)        | 634.6 (527.9-762.0)        | 1184.4 (988.4-1402.4)        |
| United Republic of Tanzania        | 897.5 (749.1-1067.5)        | 634.2 (528.1-763.1)        | 1178.4 (975.9-1406.8)        |
| Zambia                             | 896.1 (747.3-1063.8)        | 630.3 (524.0-759.8)        | 1167.6 (968.7-1396.1)        |
| <b>Southern Sub-Saharan Africa</b> | <b>903.6 (760.1-1069.2)</b> | <b>637.3 (533.0-765.6)</b> | <b>1184.9 (995.9-1388.5)</b> |
| Botswana                           | 906.0 (757.3-1077.2)        | 638.0 (527.7-766.8)        | 1183.8 (987.9-1405.6)        |
| Eswatini                           | 886.6 (735.8-1057.9)        | 628.4 (515.8-748.7)        | 1163.8 (963.4-1394.5)        |
| Lesotho                            | 871.0 (727.7-1041.3)        | 622.1 (514.4-741.7)        | 1142.0 (955.8-1366.4)        |
| Namibia                            | 905.0 (757.2-1079.1)        | 642.4 (530.3-776.8)        | 1189.4 (991.4-1419.7)        |
| South Africa                       | 911.7 (765.2-1082.3)        | 640.5 (538.1-763.4)        | 1194.0 (999.0-1412.8)        |
| Zimbabwe                           | 873.9 (728.9-1041.4)        | 624.3 (516.6-745.4)        | 1151.6 (966.9-1381.9)        |
| <b>Western Sub-Saharan Africa</b>  | <b>886.2 (745.1-1045.6)</b> | <b>626.9 (524.2-740.0)</b> | <b>1162.9 (979.1-1363.7)</b> |
| Benin                              | 889.0 (736.6-1059.5)        | 626.9 (519.0-745.6)        | 1164.2 (960.9-1381.9)        |
| Burkina Faso                       | 875.7 (736.9-1034.0)        | 621.2 (515.7-738.7)        | 1151.4 (959.6-1372.8)        |
| Cabo Verde                         | 951.6 (792.4-1131.9)        | 662.6 (544.0-785.9)        | 1236.8 (1026.7-1485.1)       |
| Cameroon                           | 893.1 (744.4-1057.7)        | 628.3 (517.1-758.8)        | 1161.2 (971.9-1382.4)        |
| Chad                               | 876.2 (727.5-1049.3)        | 617.3 (508.0-745.6)        | 1137.2 (942.2-1360.9)        |
| Côte d'Ivoire                      | 909.1 (752.9-1083.9)        | 629.2 (517.9-756.1)        | 1169.2 (963.6-1389.5)        |

| Location              | Both (95% UI)        | Female (95% UI)     | Male (95% UI)         |
|-----------------------|----------------------|---------------------|-----------------------|
| Gambia                | 898.0 (752.1-1063.5) | 631.2 (525.9-761.7) | 1173.7 (970.6-1395.2) |
| Ghana                 | 894.6 (748.0-1064.2) | 632.8 (521.2-751.6) | 1177.1 (985.2-1412.0) |
| Guinea                | 874.9 (729.5-1040.5) | 619.6 (512.2-748.3) | 1149.5 (954.8-1361.8) |
| Guinea-Bissau         | 862.5 (721.0-1036.5) | 613.6 (505.2-739.6) | 1131.2 (940.2-1350.8) |
| Liberia               | 905.2 (752.7-1072.2) | 629.2 (515.9-756.0) | 1171.7 (975.5-1391.4) |
| Mali                  | 885.0 (739.1-1054.3) | 622.4 (520.6-752.7) | 1152.4 (954.4-1369.6) |
| Mauritania            | 914.3 (763.1-1085.7) | 642.0 (529.6-760.9) | 1198.4 (990.5-1426.7) |
| Niger                 | 877.2 (729.4-1038.9) | 617.7 (513.7-740.7) | 1145.7 (951.2-1356.1) |
| Nigeria               | 881.9 (743.5-1040.4) | 627.6 (525.0-742.5) | 1164.9 (983.0-1371.4) |
| Sao Tome and Principe | 923.5 (767.8-1089.2) | 646.6 (532.7-776.3) | 1199.3 (993.5-1421.0) |
| Senegal               | 899.7 (746.6-1068.3) | 632.4 (522.7-756.9) | 1169.9 (974.0-1396.0) |
| Sierra Leone          | 889.3 (739.9-1062.5) | 624.1 (518.3-752.2) | 1156.2 (953.1-1377.3) |
| Togo                  | 887.3 (744.1-1059.9) | 628.0 (519.5-759.3) | 1165.3 (965.3-1393.6) |

Note: UI = Uncertainty interval.

**Table S6: Age-standardised prevalence of ASD sequelae per 100 000 persons by location, 2021**

| Location                                                | ASD without ID<br>(95% UI) | ASD with<br>borderline ID (95%<br>UI) | ASD with mild ID<br>(95% UI) | ASD with moderate<br>ID (95% UI) | ASD with severe<br>ID (95% UI) | ASD with<br>profound ID (95%<br>UI) |
|---------------------------------------------------------|----------------------------|---------------------------------------|------------------------------|----------------------------------|--------------------------------|-------------------------------------|
| <b>Global</b>                                           | <b>352.4 (284.8-421.8)</b> | <b>155.3 (120.0-195.0)</b>            | <b>117.5 (88.9-155.9)</b>    | <b>109.0 (78.1-145.0)</b>        | <b>43.4 (26.3-68.1)</b>        | <b>10.8 (4.8-19.3)</b>              |
| <b>Central Europe, Eastern Europe, and Central Asia</b> | <b>414.6 (334.9-494.8)</b> | <b>182.7 (140.5-229.0)</b>            | <b>138.2 (104.3-182.9)</b>   | <b>128.2 (91.9-168.7)</b>        | <b>51.0 (30.9-80.2)</b>        | <b>12.7 (5.6-22.8)</b>              |
| <b>Central Asia</b>                                     | <b>396.1 (323.1-473.3)</b> | <b>174.5 (134.6-220.0)</b>            | <b>132.0 (100.3-174.4)</b>   | <b>122.5 (87.6-162.5)</b>        | <b>48.7 (29.6-76.7)</b>        | <b>12.2 (5.4-21.6)</b>              |
| Armenia                                                 | 412.2 (332.9-492.8)        | 181.6 (139.0-228.8)                   | 137.4 (101.3-182.8)          | 127.5 (90.5-170.4)               | 50.7 (30.2-77.9)               | 12.7 (5.6-22.6)                     |
| Azerbaijan                                              | 399.3 (324.4-476.7)        | 175.9 (134.2-220.3)                   | 133.1 (100.1-179.2)          | 123.4 (88.3-164.6)               | 49.1 (29.9-76.6)               | 12.3 (5.3-22.0)                     |
| Georgia                                                 | 407.1 (328.6-485.4)        | 179.4 (136.8-226.8)                   | 135.8 (101.5-184.2)          | 125.9 (89.7-167.3)               | 50.1 (30.5-79.8)               | 12.5 (5.5-22.3)                     |
| Kazakhstan                                              | 401.3 (324.3-481.3)        | 176.8 (136.5-225.6)                   | 133.8 (100.1-179.9)          | 124.1 (88.0-166.3)               | 49.4 (29.6-78.4)               | 12.3 (5.5-22.1)                     |
| Kyrgyzstan                                              | 397.3 (320.5-477.6)        | 175.1 (135.2-222.5)                   | 132.4 (99.0-177.2)           | 122.8 (87.6-163.8)               | 48.9 (29.7-76.7)               | 12.2 (5.3-22.1)                     |
| Mongolia                                                | 385.0 (312.7-458.9)        | 169.6 (130.5-214.3)                   | 128.3 (95.8-173.1)           | 119.1 (85.0-159.5)               | 47.4 (28.6-75.7)               | 11.8 (5.1-21.1)                     |
| Tajikistan                                              | 387.5 (313.8-463.9)        | 170.7 (130.2-214.9)                   | 129.2 (96.1-171.6)           | 119.8 (85.1-159.9)               | 47.7 (28.6-75.4)               | 11.9 (5.2-20.8)                     |
| Turkmenistan                                            | 395.5 (319.0-476.2)        | 174.2 (132.9-220.6)                   | 131.8 (99.1-176.6)           | 122.3 (87.5-164.1)               | 48.7 (28.9-77.3)               | 12.1 (5.3-21.4)                     |

| Location               | ASD without ID<br>(95% UI) | ASD with<br>borderline ID (95%<br>UI) | ASD with mild ID<br>(95% UI) | ASD with moderate<br>ID (95% UI) | ASD with severe<br>ID (95% UI) | ASD with<br>profound ID (95%<br>UI) |
|------------------------|----------------------------|---------------------------------------|------------------------------|----------------------------------|--------------------------------|-------------------------------------|
| Uzbekistan             | 393.1 (320.2-469.6)        | 173.2 (133.8-220.5)                   | 131.0 (97.9-174.7)           | 121.6 (86.8-162.0)               | 48.4 (29.1-76.5)               | 12.1 (5.2-21.4)                     |
| <b>Central Europe</b>  | <b>431.2 (347.0-517.4)</b> | <b>189.9 (145.7-239.0)</b>            | <b>143.7 (107.9-189.3)</b>   | <b>133.3 (95.6-177.5)</b>        | <b>53.0 (32.1-83.5)</b>        | <b>13.2 (5.8-23.8)</b>              |
| Albania                | 422.0 (341.8-506.4)        | 185.9 (143.0-232.4)                   | 140.7 (104.0-188.7)          | 130.5 (93.5-177.7)               | 51.9 (31.1-81.7)               | 13.0 (5.7-23.4)                     |
| Bosnia and Herzegovina | 434.6 (351.6-519.1)        | 191.4 (147.8-242.1)                   | 144.9 (107.1-194.6)          | 134.4 (95.9-179.8)               | 53.4 (32.0-84.3)               | 13.3 (5.9-24.3)                     |
| Bulgaria               | 418.8 (333.7-500.5)        | 184.5 (143.0-233.2)                   | 139.6 (104.5-185.3)          | 129.5 (92.2-173.3)               | 51.5 (31.4-81.3)               | 12.9 (5.6-23.1)                     |
| Croatia                | 445.2 (358.0-536.6)        | 196.2 (151.7-248.9)                   | 148.4 (109.3-199.6)          | 137.7 (98.1-184.0)               | 54.8 (33.3-86.5)               | 13.7 (6.0-24.6)                     |
| Czechia                | 445.6 (358.6-538.3)        | 196.3 (150.3-246.9)                   | 148.5 (109.1-198.1)          | 137.7 (98.7-181.2)               | 54.8 (33.3-87.2)               | 13.7 (5.9-24.8)                     |
| Hungary                | 434.1 (352.7-520.1)        | 191.3 (147.0-242.8)                   | 144.7 (107.6-193.5)          | 134.2 (95.5-180.6)               | 53.4 (31.8-84.8)               | 13.3 (5.9-23.9)                     |
| Montenegro             | 436.5 (351.0-521.9)        | 192.3 (147.2-243.2)                   | 145.5 (106.1-194.3)          | 134.9 (96.6-182.7)               | 53.7 (32.3-85.1)               | 13.4 (5.9-24.1)                     |
| North Macedonia        | 428.1 (346.2-515.5)        | 188.6 (146.2-238.2)                   | 142.7 (105.8-188.2)          | 132.3 (94.5-175.3)               | 52.7 (31.4-82.2)               | 13.2 (5.7-24.2)                     |
| Poland                 | 431.2 (348.8-519.8)        | 189.9 (146.6-238.6)                   | 143.7 (107.0-190.0)          | 133.3 (95.5-177.2)               | 53.1 (32.0-82.7)               | 13.2 (5.8-23.8)                     |
| Romania                | 419.8 (339.0-499.7)        | 184.9 (142.8-232.3)                   | 139.9 (104.6-185.0)          | 129.8 (92.7-174.4)               | 51.7 (30.9-81.4)               | 12.9 (5.7-23.3)                     |



| Location              | ASD without ID<br>(95% UI) | ASD with<br>borderline ID (95%<br>UI) | ASD with mild ID<br>(95% UI) | ASD with moderate<br>ID (95% UI) | ASD with severe<br>ID (95% UI) | ASD with<br>profound ID (95%<br>UI) |
|-----------------------|----------------------------|---------------------------------------|------------------------------|----------------------------------|--------------------------------|-------------------------------------|
| Serbia                | 433.0 (345.2-519.7)        | 190.7 (147.1-239.3)                   | 144.3 (106.5-192.2)          | 133.9 (96.2-179.4)               | 53.3 (32.1-84.9)               | 13.3 (5.8-24.0)                     |
| Slovakia              | 432.2 (349.9-519.9)        | 190.4 (148.2-238.3)                   | 144.1 (107.4-194.5)          | 133.6 (95.4-180.6)               | 53.2 (32.3-83.9)               | 13.3 (5.8-23.8)                     |
| Slovenia              | 455.1 (370.3-554.0)        | 200.5 (153.2-256.4)                   | 151.7 (111.7-199.9)          | 140.7 (101.0-188.8)              | 56.0 (33.7-87.5)               | 14.0 (6.1-25.4)                     |
| <b>Eastern Europe</b> | <b>415.1 (333.9-495.1)</b> | <b>182.9 (140.9-229.1)</b>            | <b>138.4 (103.7-182.8)</b>   | <b>128.4 (92.0-170.0)</b>        | <b>51.1 (30.8-80.4)</b>        | <b>12.8 (5.6-22.9)</b>              |
| Belarus               | 422.6 (343.0-505.8)        | 186.1 (143.8-230.5)                   | 140.9 (104.2-185.6)          | 130.7 (93.5-173.5)               | 52.0 (31.6-80.4)               | 13.0 (5.7-23.3)                     |
| Estonia               | 431.2 (347.2-518.9)        | 190.0 (144.7-241.9)                   | 143.7 (108.1-192.2)          | 133.3 (94.6-181.6)               | 53.0 (31.6-82.0)               | 13.3 (5.7-24.1)                     |
| Latvia                | 421.7 (337.7-502.5)        | 185.8 (144.0-233.7)                   | 140.5 (104.0-185.5)          | 130.4 (92.9-174.0)               | 51.9 (31.6-81.5)               | 13.0 (5.7-23.6)                     |
| Lithuania             | 422.4 (341.7-505.9)        | 186.1 (140.5-234.0)                   | 140.8 (105.0-189.2)          | 130.6 (92.7-176.7)               | 52.0 (31.6-80.6)               | 13.0 (5.7-23.2)                     |
| Republic of Moldova   | 410.4 (330.5-493.1)        | 180.8 (139.3-229.7)                   | 136.7 (101.3-182.1)          | 126.9 (90.6-169.8)               | 50.5 (30.6-79.2)               | 12.6 (5.4-22.6)                     |
| Russian Federation    | 415.2 (335.3-497.3)        | 182.9 (140.8-229.8)                   | 138.4 (103.7-183.7)          | 128.4 (92.2-169.8)               | 51.1 (31.1-80.3)               | 12.8 (5.6-22.9)                     |
| Ukraine               | 412.3 (331.1-495.1)        | 181.6 (139.0-226.6)                   | 137.4 (103.1-183.1)          | 127.5 (90.8-168.8)               | 50.7 (30.1-81.7)               | 12.7 (5.5-22.5)                     |
| <b>High-income</b>    | <b>487.4 (393.6-585.3)</b> | <b>214.7 (165.8-269.6)</b>            | <b>162.5 (121.7-216.3)</b>   | <b>150.7 (108.1-200.7)</b>       | <b>60.0 (36.6-94.8)</b>        | <b>15.0 (6.6-26.8)</b>              |

| Location                         | ASD without ID<br>(95% UI) | ASD with<br>borderline ID (95%<br>UI) | ASD with mild ID<br>(95% UI) | ASD with moderate<br>ID (95% UI) | ASD with severe<br>ID (95% UI) | ASD with<br>profound ID (95%<br>UI) |
|----------------------------------|----------------------------|---------------------------------------|------------------------------|----------------------------------|--------------------------------|-------------------------------------|
| <b>Australasia</b>               | <b>532.4 (428.6-643.0)</b> | <b>234.5 (181.9-297.7)</b>            | <b>177.5 (130.6-234.2)</b>   | <b>164.7 (116.4-219.0)</b>       | <b>65.5 (39.3-103.4)</b>       | <b>16.4 (7.1-29.2)</b>              |
| Australia                        | 534.4 (430.1-647.9)        | 235.4 (182.1-298.9)                   | 178.1 (130.7-235.8)          | 165.3 (116.7-219.9)              | 65.8 (39.4-104.0)              | 16.4 (7.1-29.4)                     |
| New Zealand                      | 522.7 (426.1-631.9)        | 230.3 (180.3-291.0)                   | 174.2 (129.1-229.5)          | 161.6 (115.0-213.6)              | 64.3 (38.7-100.7)              | 16.1 (7.0-28.5)                     |
| <b>High-income Asia Pacific</b>  | <b>697.2 (561.8-839.6)</b> | <b>307.1 (240.2-388.1)</b>            | <b>232.4 (173.2-307.8)</b>   | <b>215.6 (153.8-286.8)</b>       | <b>85.8 (52.1-135.0)</b>       | <b>21.4 (9.4-38.3)</b>              |
| Brunei Darussalam                | 612.7 (496.0-732.5)        | 269.9 (209.3-339.4)                   | 204.3 (151.9-273.8)          | 189.5 (134.9-250.2)              | 75.4 (45.9-120.4)              | 18.8 (8.3-33.7)                     |
| Japan                            | 709.5 (570.9-852.6)        | 312.5 (242.6-397.2)                   | 236.4 (176.7-313.4)          | 219.4 (156.5-294.2)              | 87.3 (53.0-137.4)              | 21.8 (9.6-39.0)                     |
| Republic of Korea                | 673.7 (536.7-812.5)        | 296.7 (230.0-369.8)                   | 224.5 (166.9-296.1)          | 208.3 (149.9-279.5)              | 82.8 (50.5-129.3)              | 20.7 (9.0-37.4)                     |
| Singapore                        | 664.9 (540.3-795.2)        | 292.9 (226.3-368.9)                   | 221.6 (164.2-288.6)          | 205.7 (147.6-275.5)              | 81.8 (49.1-129.7)              | 20.4 (8.9-36.7)                     |
| <b>High-income North America</b> | <b>490.5 (395.5-588.5)</b> | <b>216.1 (166.7-270.7)</b>            | <b>163.5 (123.3-217.9)</b>   | <b>151.7 (108.8-202.4)</b>       | <b>60.3 (36.9-95.3)</b>        | <b>15.1 (6.6-27.0)</b>              |
| Canada                           | 499.8 (403.2-597.8)        | 220.2 (171.3-276.9)                   | 166.6 (122.3-225.7)          | 154.6 (110.7-208.5)              | 61.5 (37.0-97.1)               | 15.4 (6.8-27.7)                     |
| Greenland                        | 454.6 (369.0-547.9)        | 200.3 (154.5-252.3)                   | 151.5 (111.7-201.3)          | 140.6 (100.0-188.5)              | 55.9 (33.6-87.4)               | 14.0 (6.0-25.0)                     |
| United States of America         | 489.5 (395.2-587.9)        | 215.6 (166.5-269.9)                   | 163.1 (123.2-216.9)          | 151.4 (108.3-202.0)              | 60.2 (36.8-95.3)               | 15.0 (6.6-26.9)                     |

| Location                      | ASD without ID<br>(95% UI) | ASD with<br>borderline ID (95%<br>UI) | ASD with mild ID<br>(95% UI) | ASD with moderate<br>ID (95% UI) | ASD with severe<br>ID (95% UI) | ASD with<br>profound ID (95%<br>UI) |
|-------------------------------|----------------------------|---------------------------------------|------------------------------|----------------------------------|--------------------------------|-------------------------------------|
| <b>Southern Latin America</b> | <b>472.3 (384.1-562.9)</b> | <b>208.1 (161.0-262.4)</b>            | <b>157.4 (116.8-212.7)</b>   | <b>146.1 (104.6-196.0)</b>       | <b>58.1 (35.6-92.7)</b>        | <b>14.5 (6.4-25.8)</b>              |
| Argentina                     | 467.5 (378.7-557.3)        | 205.9 (159.4-261.2)                   | 155.8 (114.6-211.9)          | 144.6 (102.7-194.7)              | 57.5 (34.8-92.2)               | 14.4 (6.2-25.6)                     |
| Chile                         | 484.0 (391.9-582.4)        | 213.2 (164.8-270.2)                   | 161.3 (119.7-214.3)          | 149.7 (106.5-198.6)              | 59.5 (36.2-94.3)               | 14.9 (6.5-26.7)                     |
| Uruguay                       | 473.0 (378.5-565.5)        | 208.4 (161.6-263.4)                   | 157.6 (116.4-207.9)          | 146.3 (104.9-197.2)              | 58.2 (35.1-92.0)               | 14.5 (6.3-26.3)                     |
| <b>Western Europe</b>         | <b>400.8 (323.3-480.5)</b> | <b>176.6 (136.6-220.9)</b>            | <b>133.6 (99.8-178.8)</b>    | <b>124.0 (89.1-164.8)</b>        | <b>49.3 (30.1-77.7)</b>        | <b>12.3 (5.4-22.1)</b>              |
| Andorra                       | 405.0 (325.4-486.6)        | 178.4 (136.8-225.4)                   | 135.0 (100.2-178.5)          | 125.2 (89.7-167.5)               | 49.8 (29.9-77.7)               | 12.4 (5.5-22.4)                     |
| Austria                       | 398.9 (316.5-479.6)        | 175.7 (134.0-220.1)                   | 133.0 (99.1-180.1)           | 123.3 (88.3-163.3)               | 49.1 (29.5-78.9)               | 12.2 (5.4-21.8)                     |
| Belgium                       | 395.8 (319.9-474.6)        | 174.4 (135.1-221.7)                   | 131.9 (97.5-178.6)           | 122.4 (86.6-166.6)               | 48.7 (29.0-76.6)               | 12.2 (5.4-22.2)                     |
| Cyprus                        | 394.7 (318.4-472.4)        | 173.8 (134.4-218.7)                   | 131.6 (97.7-175.0)           | 122.0 (86.8-162.0)               | 48.6 (29.2-77.5)               | 12.1 (5.3-21.7)                     |
| Denmark                       | 423.2 (344.7-508.7)        | 186.4 (143.7-237.0)                   | 141.0 (104.4-188.9)          | 130.9 (94.6-179.4)               | 52.0 (30.8-81.0)               | 13.0 (5.6-23.5)                     |
| Finland                       | 370.5 (300.1-447.8)        | 163.2 (126.2-202.8)                   | 123.5 (92.2-165.1)           | 114.6 (82.2-154.7)               | 45.6 (27.6-70.7)               | 11.4 (5.0-20.5)                     |
| France                        | 394.0 (318.5-470.3)        | 173.5 (134.4-216.5)                   | 131.4 (97.3-177.2)           | 121.9 (87.5-163.5)               | 48.5 (29.3-77.1)               | 12.1 (5.3-21.4)                     |

| <b>Location</b> | <b>ASD without ID<br/>(95% UI)</b> | <b>ASD with<br/>borderline ID (95%<br/>UI)</b> | <b>ASD with mild ID<br/>(95% UI)</b> | <b>ASD with moderate<br/>ID (95% UI)</b> | <b>ASD with severe<br/>ID (95% UI)</b> | <b>ASD with<br/>profound ID (95%<br/>UI)</b> |
|-----------------|------------------------------------|------------------------------------------------|--------------------------------------|------------------------------------------|----------------------------------------|----------------------------------------------|
| Germany         | 401.2 (319.0-481.0)                | 176.8 (135.9-222.9)                            | 133.8 (98.4-180.9)                   | 124.0 (88.3-165.8)                       | 49.3 (30.0-78.2)                       | 12.3 (5.3-22.5)                              |
| Greece          | 394.1 (315.1-473.7)                | 173.6 (135.7-220.6)                            | 131.4 (97.6-174.6)                   | 121.8 (86.9-163.9)                       | 48.5 (29.1-76.6)                       | 12.1 (5.3-21.7)                              |
| Iceland         | 468.2 (382.8-564.1)                | 206.3 (157.4-259.3)                            | 156.1 (117.0-206.4)                  | 144.8 (103.6-191.8)                      | 57.5 (34.6-87.9)                       | 14.4 (6.2-25.7)                              |
| Ireland         | 479.3 (383.5-583.6)                | 211.1 (163.6-268.1)                            | 159.8 (119.3-214.5)                  | 148.2 (106.4-198.0)                      | 58.9 (35.5-92.2)                       | 14.7 (6.4-26.7)                              |
| Israel          | 355.5 (287.0-427.4)                | 156.6 (119.5-198.0)                            | 118.5 (87.1-159.8)                   | 109.9 (78.6-152.0)                       | 43.7 (26.3-68.6)                       | 10.9 (4.8-19.5)                              |
| Italy           | 446.7 (363.4-534.1)                | 196.8 (151.4-246.9)                            | 148.9 (111.8-199.6)                  | 138.2 (98.5-184.8)                       | 55.0 (33.3-86.1)                       | 13.7 (6.1-24.6)                              |
| Luxembourg      | 403.2 (322.9-482.4)                | 177.5 (137.1-223.1)                            | 134.4 (99.6-182.6)                   | 124.7 (89.5-168.8)                       | 49.6 (30.0-77.7)                       | 12.4 (5.4-21.6)                              |
| Malta           | 401.5 (324.2-483.5)                | 176.9 (132.5-223.7)                            | 133.8 (99.3-182.4)                   | 124.1 (89.4-165.6)                       | 49.4 (29.8-77.8)                       | 12.3 (5.4-22.2)                              |
| Monaco          | 398.2 (322.6-478.8)                | 175.4 (135.3-222.8)                            | 132.7 (98.9-178.7)                   | 123.1 (88.2-165.6)                       | 49.0 (29.8-77.9)                       | 12.2 (5.4-22.3)                              |
| Netherlands     | 402.2 (323.5-483.5)                | 177.2 (137.5-223.2)                            | 134.1 (99.1-181.2)                   | 124.4 (87.5-167.0)                       | 49.5 (29.9-78.3)                       | 12.3 (5.4-21.8)                              |
| Norway          | 361.3 (291.4-434.2)                | 159.2 (122.6-198.8)                            | 120.5 (90.1-160.5)                   | 111.7 (80.1-149.4)                       | 44.4 (27.0-70.2)                       | 11.1 (4.9-20.0)                              |
| Portugal        | 385.3 (310.2-461.3)                | 169.7 (131.9-213.7)                            | 128.4 (95.5-170.8)                   | 119.1 (85.3-158.5)                       | 47.4 (28.5-75.6)                       | 11.8 (5.2-20.7)                              |

| Location                           | ASD without ID<br>(95% UI) | ASD with<br>borderline ID (95%<br>UI) | ASD with mild ID<br>(95% UI) | ASD with moderate<br>ID (95% UI) | ASD with severe<br>ID (95% UI) | ASD with<br>profound ID (95%<br>UI) |
|------------------------------------|----------------------------|---------------------------------------|------------------------------|----------------------------------|--------------------------------|-------------------------------------|
| San Marino                         | 398.2 (320.7-475.8)        | 175.4 (134.3-222.8)                   | 132.8 (97.4-180.4)           | 123.1 (87.8-163.7)               | 49.0 (29.8-77.3)               | 12.2 (5.5-21.9)                     |
| Spain                              | 458.2 (367.7-548.3)        | 201.8 (157.6-251.0)                   | 152.7 (114.6-205.0)          | 141.7 (101.9-190.7)              | 56.3 (33.7-88.8)               | 14.1 (6.1-25.7)                     |
| Sweden                             | 454.5 (361.8-555.9)        | 200.2 (153.9-255.5)                   | 151.5 (112.2-201.3)          | 140.6 (100.4-189.9)              | 55.9 (33.5-87.1)               | 14.0 (6.1-25.7)                     |
| Switzerland                        | 403.4 (324.5-481.2)        | 177.7 (136.8-224.9)                   | 134.5 (98.6-183.6)           | 124.7 (87.7-164.7)               | 49.6 (29.9-78.7)               | 12.4 (5.3-22.6)                     |
| United Kingdom                     | 335.7 (270.5-403.5)        | 147.9 (113.4-185.7)                   | 111.9 (83.8-149.4)           | 103.8 (74.3-139.5)               | 41.3 (25.1-65.1)               | 10.3 (4.6-18.6)                     |
| <b>Latin America and Caribbean</b> | <b>308.3 (249.8-369.6)</b> | <b>135.8 (103.6-170.6)</b>            | <b>102.7 (77.8-137.0)</b>    | <b>95.3 (68.2-127.0)</b>         | <b>37.9 (23.0-59.8)</b>        | <b>9.5 (4.2-16.9)</b>               |
| <b>Andean Latin America</b>        | <b>305.9 (248.1-368.3)</b> | <b>134.8 (104.1-169.4)</b>            | <b>102.0 (76.7-137.7)</b>    | <b>94.6 (67.2-126.2)</b>         | <b>37.6 (22.7-59.6)</b>        | <b>9.4 (4.1-16.7)</b>               |
| Bolivia (Plurinational State of)   | 296.5 (237.5-359.3)        | 130.6 (101.2-165.1)                   | 98.8 (74.0-134.7)            | 91.7 (65.6-123.7)                | 36.5 (21.9-58.5)               | 9.1 (3.9-16.4)                      |
| Ecuador                            | 305.2 (246.2-369.2)        | 134.4 (103.2-168.9)                   | 101.7 (75.8-133.9)           | 94.4 (66.6-125.5)                | 37.6 (22.8-60.0)               | 9.4 (4.1-16.7)                      |
| Peru                               | 309.2 (250.6-370.6)        | 136.2 (104.7-172.8)                   | 103.1 (76.5-139.4)           | 95.6 (68.3-127.7)                | 38.0 (23.0-60.0)               | 9.5 (4.1-16.8)                      |
| <b>Caribbean</b>                   | <b>305.1 (245.9-364.5)</b> | <b>134.4 (103.2-169.4)</b>            | <b>101.7 (76.5-134.9)</b>    | <b>94.4 (67.4-125.9)</b>         | <b>37.5 (22.7-59.7)</b>        | <b>9.4 (4.1-16.8)</b>               |
| Antigua and Barbuda                | 318.1 (254.7-381.4)        | 140.1 (106.2-179.3)                   | 106.1 (78.0-142.5)           | 98.4 (70.3-131.0)                | 39.1 (23.6-61.7)               | 9.8 (4.2-17.8)                      |

| <b>Location</b>    | <b>ASD without ID<br/>(95% UI)</b> | <b>ASD with<br/>borderline ID (95%<br/>UI)</b> | <b>ASD with mild ID<br/>(95% UI)</b> | <b>ASD with moderate<br/>ID (95% UI)</b> | <b>ASD with severe<br/>ID (95% UI)</b> | <b>ASD with<br/>profound ID (95%<br/>UI)</b> |
|--------------------|------------------------------------|------------------------------------------------|--------------------------------------|------------------------------------------|----------------------------------------|----------------------------------------------|
| Bahamas            | 309.8 (250.9-372.3)                | 136.4 (105.6-171.4)                            | 103.2 (77.3-139.6)                   | 95.8 (68.5-127.7)                        | 38.1 (23.0-60.1)                       | 9.5 (4.1-17.1)                               |
| Barbados           | 318.4 (256.8-383.9)                | 140.3 (107.6-176.8)                            | 106.2 (79.2-141.9)                   | 98.5 (70.2-133.0)                        | 39.2 (23.8-61.7)                       | 9.8 (4.3-17.6)                               |
| Belize             | 305.4 (247.0-369.9)                | 134.5 (102.9-170.6)                            | 101.8 (75.2-135.6)                   | 94.4 (67.5-126.4)                        | 37.6 (22.6-58.7)                       | 9.4 (4.1-17.0)                               |
| Bermuda            | 331.0 (268.4-402.6)                | 145.8 (111.7-184.5)                            | 110.4 (81.2-148.8)                   | 102.3 (72.8-136.6)                       | 40.7 (24.9-64.7)                       | 10.2 (4.5-18.5)                              |
| Cuba               | 323.4 (261.2-386.2)                | 142.5 (108.1-179.9)                            | 107.8 (80.4-141.9)                   | 100.0 (71.3-134.1)                       | 39.8 (24.2-61.6)                       | 9.9 (4.3-18.0)                               |
| Dominica           | 310.7 (251.2-372.9)                | 136.9 (105.5-171.8)                            | 103.6 (77.7-136.5)                   | 96.1 (69.6-128.0)                        | 38.2 (23.1-60.8)                       | 9.6 (4.2-17.0)                               |
| Dominican Republic | 302.7 (245.6-366.7)                | 133.3 (102.9-169.0)                            | 100.9 (74.0-134.8)                   | 93.6 (67.0-125.5)                        | 37.2 (22.5-60.6)                       | 9.3 (4.0-16.6)                               |
| Grenada            | 312.0 (253.6-374.2)                | 137.4 (106.4-173.0)                            | 104.0 (77.0-138.5)                   | 96.5 (68.7-130.7)                        | 38.4 (23.6-59.9)                       | 9.6 (4.2-17.2)                               |
| Guyana             | 296.5 (238.2-358.8)                | 130.6 (101.7-165.4)                            | 98.8 (73.1-132.1)                    | 91.7 (65.0-122.9)                        | 36.5 (21.8-58.4)                       | 9.1 (4.0-16.2)                               |
| Haiti              | 280.3 (225.2-336.4)                | 123.5 (93.6-157.7)                             | 93.4 (69.8-125.5)                    | 86.7 (61.9-115.8)                        | 34.5 (20.3-54.8)                       | 8.6 (3.7-15.2)                               |
| Jamaica            | 314.1 (253.3-379.3)                | 138.4 (107.2-174.3)                            | 104.7 (77.4-139.4)                   | 97.1 (69.7-129.6)                        | 38.6 (23.0-60.6)                       | 9.7 (4.2-17.4)                               |
| Puerto Rico        | 326.8 (265.4-391.2)                | 144.0 (111.0-178.4)                            | 109.0 (79.9-143.8)                   | 101.1 (71.4-137.2)                       | 40.2 (23.9-63.3)                       | 10.0 (4.3-18.5)                              |

| Location                         | ASD without ID<br>(95% UI) | ASD with<br>borderline ID (95%<br>UI) | ASD with mild ID<br>(95% UI) | ASD with moderate<br>ID (95% UI) | ASD with severe<br>ID (95% UI) | ASD with<br>profound ID (95%<br>UI) |
|----------------------------------|----------------------------|---------------------------------------|------------------------------|----------------------------------|--------------------------------|-------------------------------------|
| Saint Kitts and Nevis            | 310.6 (251.8-372.8)        | 136.8 (105.3-173.1)                   | 103.6 (77.0-139.4)           | 96.1 (68.4-130.2)                | 38.2 (23.6-60.1)               | 9.5 (4.1-17.2)                      |
| Saint Lucia                      | 314.0 (252.2-374.9)        | 138.3 (105.7-174.7)                   | 104.7 (77.2-138.8)           | 97.1 (69.0-130.1)                | 38.6 (23.4-60.8)               | 9.7 (4.2-17.3)                      |
| Saint Vincent and the Grenadines | 310.1 (248.8-368.8)        | 136.6 (104.6-174.5)                   | 103.4 (76.4-137.5)           | 95.9 (68.9-129.6)                | 38.2 (23.1-59.9)               | 9.5 (4.1-17.1)                      |
| Suriname                         | 301.2 (242.7-361.2)        | 132.7 (102.9-169.1)                   | 100.4 (74.2-132.1)           | 93.2 (65.8-125.2)                | 37.1 (22.3-57.8)               | 9.2 (4.1-16.7)                      |
| Trinidad and Tobago              | 312.5 (253.3-375.5)        | 137.7 (106.8-174.4)                   | 104.2 (76.6-141.6)           | 96.7 (69.7-130.9)                | 38.4 (23.1-61.8)               | 9.6 (4.1-17.5)                      |
| United States Virgin Islands     | 317.4 (255.9-378.6)        | 139.8 (106.3-173.3)                   | 105.8 (77.5-142.3)           | 98.1 (70.6-132.3)                | 39.0 (23.7-61.6)               | 9.7 (4.3-17.5)                      |
| <b>Central Latin America</b>     | <b>339.1 (276.0-406.1)</b> | <b>149.4 (114.4-187.7)</b>            | <b>113.0 (85.5-149.9)</b>    | <b>104.9 (75.1-139.8)</b>        | <b>41.7 (25.4-65.5)</b>        | <b>10.4 (4.6-18.6)</b>              |
| Colombia                         | 345.1 (279.2-418.0)        | 152.0 (115.9-193.2)                   | 115.0 (84.6-153.2)           | 106.7 (76.4-142.2)               | 42.4 (25.8-66.3)               | 10.6 (4.6-18.9)                     |
| Costa Rica                       | 354.0 (286.2-425.5)        | 156.0 (118.8-198.6)                   | 118.0 (87.1-155.6)           | 109.5 (78.2-147.0)               | 43.5 (26.1-68.5)               | 10.9 (4.8-19.6)                     |
| El Salvador                      | 333.3 (269.9-398.6)        | 146.9 (112.2-186.9)                   | 111.1 (82.6-146.4)           | 103.1 (74.2-138.1)               | 41.0 (24.6-65.0)               | 10.2 (4.4-18.4)                     |
| Guatemala                        | 324.5 (263.2-388.4)        | 143.0 (108.5-178.2)                   | 108.2 (80.0-145.1)           | 100.4 (71.0-134.8)               | 39.9 (24.0-63.2)               | 10.0 (4.4-17.9)                     |
| Honduras                         | 325.4 (263.4-394.3)        | 143.3 (110.9-182.0)                   | 108.4 (81.7-144.8)           | 100.6 (71.2-133.9)               | 40.0 (24.1-63.2)               | 10.0 (4.3-17.9)                     |

| Location                            | ASD without ID<br>(95% UI) | ASD with<br>borderline ID (95%<br>UI) | ASD with mild ID<br>(95% UI) | ASD with moderate<br>ID (95% UI) | ASD with severe<br>ID (95% UI) | ASD with<br>profound ID (95%<br>UI) |
|-------------------------------------|----------------------------|---------------------------------------|------------------------------|----------------------------------|--------------------------------|-------------------------------------|
| Mexico                              | 339.1 (273.8-406.1)        | 149.4 (114.7-188.0)                   | 113.0 (85.3-148.9)           | 104.9 (74.9-139.2)               | 41.7 (25.2-65.9)               | 10.4 (4.6-18.6)                     |
| Nicaragua                           | 338.0 (271.5-409.6)        | 148.9 (115.1-186.3)                   | 112.7 (83.8-153.5)           | 104.6 (73.9-139.7)               | 41.6 (25.1-65.9)               | 10.4 (4.5-18.6)                     |
| Panama                              | 348.6 (279.7-419.1)        | 153.6 (118.0-192.3)                   | 116.2 (85.9-156.1)           | 107.8 (77.6-142.8)               | 42.9 (26.0-68.3)               | 10.7 (4.6-19.2)                     |
| Venezuela (Bolivarian Republic of)  | 338.3 (272.6-405.3)        | 149.0 (114.6-189.4)                   | 112.8 (83.7-150.7)           | 104.6 (74.6-142.0)               | 41.6 (25.1-65.1)               | 10.4 (4.5-18.7)                     |
| <b>Tropical Latin America</b>       | <b>274.7 (221.2-329.6)</b> | <b>121.0 (92.5-152.1)</b>             | <b>91.6 (69.0-122.5)</b>     | <b>85.0 (61.0-113.5)</b>         | <b>33.8 (20.4-53.2)</b>        | <b>8.4 (3.7-15.1)</b>               |
| Brazil                              | 274.5 (221.1-329.3)        | 120.9 (92.4-152.1)                    | 91.5 (68.9-122.4)            | 84.9 (60.9-113.4)                | 33.8 (20.4-53.2)               | 8.4 (3.7-15.1)                      |
| Paraguay                            | 280.8 (227.6-338.6)        | 123.7 (95.2-156.1)                    | 93.6 (68.8-123.2)            | 86.9 (61.4-116.0)                | 34.6 (20.6-54.7)               | 8.6 (3.8-15.7)                      |
| <b>North Africa and Middle East</b> | <b>345.0 (280.8-411.1)</b> | <b>152.0 (116.5-191.4)</b>            | <b>115.0 (87.0-153.5)</b>    | <b>106.7 (76.2-142.0)</b>        | <b>42.4 (25.7-66.6)</b>        | <b>10.6 (4.7-18.8)</b>              |
| Afghanistan                         | 314.3 (254.1-376.5)        | 138.5 (105.3-174.8)                   | 104.8 (78.3-141.2)           | 97.2 (69.1-130.3)                | 38.7 (22.9-61.0)               | 9.7 (4.3-17.1)                      |
| Algeria                             | 346.3 (282.0-418.7)        | 152.5 (117.9-192.6)                   | 115.4 (84.4-154.3)           | 107.1 (76.4-143.2)               | 42.6 (25.8-67.6)               | 10.6 (4.6-18.9)                     |
| Bahrain                             | 379.3 (307.9-455.2)        | 167.1 (129.0-212.0)                   | 126.4 (93.0-168.0)           | 117.3 (83.5-158.8)               | 46.7 (28.3-72.7)               | 11.7 (5.0-21.3)                     |
| Egypt                               | 341.4 (276.9-408.8)        | 150.4 (114.9-189.7)                   | 113.8 (84.1-152.1)           | 105.6 (75.4-142.4)               | 42.0 (25.3-66.5)               | 10.5 (4.5-18.3)                     |



| <b>Location</b>            | <b>ASD without ID<br/>(95% UI)</b> | <b>ASD with<br/>borderline ID (95%<br/>UI)</b> | <b>ASD with mild ID<br/>(95% UI)</b> | <b>ASD with moderate<br/>ID (95% UI)</b> | <b>ASD with severe<br/>ID (95% UI)</b> | <b>ASD with<br/>profound ID (95%<br/>UI)</b> |
|----------------------------|------------------------------------|------------------------------------------------|--------------------------------------|------------------------------------------|----------------------------------------|----------------------------------------------|
| Iran (Islamic Republic of) | 353.7 (285.9-423.5)                | 155.8 (119.7-195.8)                            | 117.9 (88.6-156.2)                   | 109.4 (78.4-145.4)                       | 43.5 (26.3-68.2)                       | 10.9 (4.8-19.4)                              |
| Iraq                       | 317.0 (257.0-383.7)                | 139.7 (107.7-177.4)                            | 105.7 (78.8-140.1)                   | 98.0 (69.6-131.1)                        | 39.0 (23.3-61.6)                       | 9.7 (4.2-17.6)                               |
| Jordan                     | 362.1 (290.2-432.2)                | 159.5 (122.4-201.5)                            | 120.7 (88.5-161.0)                   | 112.0 (80.6-149.8)                       | 44.5 (26.9-70.1)                       | 11.1 (4.9-19.8)                              |
| Kuwait                     | 370.9 (302.6-447.3)                | 163.3 (124.0-203.3)                            | 123.6 (90.7-164.7)                   | 114.7 (82.2-154.5)                       | 45.6 (27.3-71.4)                       | 11.4 (5.0-20.9)                              |
| Lebanon                    | 390.1 (314.9-470.5)                | 171.8 (131.7-216.0)                            | 130.0 (95.5-173.6)                   | 120.6 (85.9-160.2)                       | 48.0 (28.7-75.2)                       | 12.0 (5.2-21.3)                              |
| Libya                      | 343.8 (277.5-412.7)                | 151.5 (115.7-193.1)                            | 114.6 (85.3-154.2)                   | 106.3 (75.8-141.0)                       | 42.3 (25.1-67.4)                       | 10.6 (4.6-19.0)                              |
| Morocco                    | 338.1 (274.3-403.7)                | 148.9 (113.3-186.7)                            | 112.7 (82.5-149.4)                   | 104.5 (75.0-140.1)                       | 41.6 (25.0-65.8)                       | 10.4 (4.5-18.7)                              |
| Oman                       | 372.3 (298.6-446.0)                | 164.0 (126.7-209.3)                            | 124.1 (92.6-165.4)                   | 115.2 (81.3-155.5)                       | 45.8 (27.4-72.5)                       | 11.4 (5.0-20.8)                              |
| Palestine                  | 349.7 (283.0-419.1)                | 154.0 (118.7-196.1)                            | 116.5 (86.6-156.3)                   | 108.1 (76.7-144.2)                       | 43.0 (26.2-67.4)                       | 10.7 (4.7-19.1)                              |
| Qatar                      | 431.3 (340.8-519.6)                | 190.0 (145.0-241.4)                            | 143.7 (105.6-192.9)                  | 133.3 (95.3-178.3)                       | 53.0 (31.9-83.9)                       | 13.3 (5.8-23.9)                              |
| Saudi Arabia               | 365.6 (295.6-434.8)                | 161.0 (125.3-205.5)                            | 121.9 (90.0-164.9)                   | 113.1 (80.3-151.5)                       | 45.0 (26.6-71.8)                       | 11.2 (5.0-20.5)                              |
| Sudan                      | 329.7 (265.0-393.5)                | 145.3 (111.8-186.7)                            | 109.9 (81.1-147.4)                   | 101.9 (72.5-136.9)                       | 40.6 (24.1-63.7)                       | 10.1 (4.5-17.9)                              |

| Location                                      | ASD without ID<br>(95% UI) | ASD with<br>borderline ID (95%<br>UI) | ASD with mild ID<br>(95% UI) | ASD with moderate<br>ID (95% UI) | ASD with severe<br>ID (95% UI) | ASD with<br>profound ID (95%<br>UI) |
|-----------------------------------------------|----------------------------|---------------------------------------|------------------------------|----------------------------------|--------------------------------|-------------------------------------|
| Syrian Arab Republic                          | 339.3 (273.8-409.2)        | 149.5 (113.9-188.7)                   | 113.1 (83.3-151.5)           | 104.9 (74.1-141.1)               | 41.8 (25.1-65.9)               | 10.4 (4.6-18.4)                     |
| Tunisia                                       | 350.9 (283.3-419.7)        | 154.6 (118.6-196.4)                   | 117.0 (87.0-155.9)           | 108.6 (77.8-145.9)               | 43.2 (26.0-67.7)               | 10.8 (4.7-19.6)                     |
| Türkiye                                       | 351.7 (282.3-420.7)        | 154.9 (119.5-194.2)                   | 117.2 (86.5-156.4)           | 108.7 (76.9-143.9)               | 43.2 (26.2-67.1)               | 10.8 (4.7-19.1)                     |
| United Arab Emirates                          | 375.9 (304.3-452.9)        | 165.6 (127.8-211.3)                   | 125.3 (92.6-169.4)           | 116.2 (83.1-156.3)               | 46.3 (27.8-72.5)               | 11.5 (5.1-20.7)                     |
| Yemen                                         | 324.8 (265.8-390.4)        | 143.1 (109.6-181.0)                   | 108.2 (81.4-144.3)           | 100.5 (71.5-134.3)               | 40.0 (23.8-64.5)               | 10.0 (4.3-17.9)                     |
| <b>South Asia</b>                             | <b>306.8 (248.0-367.9)</b> | <b>135.1 (104.5-170.2)</b>            | <b>102.2 (77.1-135.4)</b>    | <b>94.9 (67.8-126.4)</b>         | <b>37.7 (22.7-59.6)</b>        | <b>9.4 (4.1-16.8)</b>               |
| Bangladesh                                    | 263.0 (210.5-315.0)        | 115.8 (88.3-147.0)                    | 87.7 (65.5-117.8)            | 81.3 (58.0-109.9)                | 32.3 (19.3-50.7)               | 8.1 (3.5-14.3)                      |
| Bhutan                                        | 289.7 (234.9-347.3)        | 127.7 (97.0-162.7)                    | 96.6 (71.5-127.1)            | 89.6 (63.9-120.5)                | 35.6 (21.3-55.5)               | 8.9 (3.9-15.8)                      |
| India                                         | 316.6 (256.6-379.7)        | 139.5 (107.4-175.3)                   | 105.5 (79.5-139.9)           | 97.9 (70.0-130.1)                | 38.9 (23.5-61.4)               | 9.7 (4.3-17.3)                      |
| Nepal                                         | 279.9 (223.3-336.4)        | 123.3 (94.3-155.8)                    | 93.3 (69.6-123.3)            | 86.6 (62.4-115.6)                | 34.4 (20.7-54.6)               | 8.6 (3.7-15.2)                      |
| Pakistan                                      | 282.1 (227.5-341.1)        | 124.3 (96.8-158.3)                    | 94.0 (70.5-124.3)            | 87.3 (62.4-117.5)                | 34.7 (20.9-55.0)               | 8.7 (3.8-15.5)                      |
| <b>Southeast Asia, East Asia, and Oceania</b> | <b>299.2 (240.6-360.3)</b> | <b>131.8 (101.1-166.6)</b>            | <b>99.7 (75.1-132.6)</b>     | <b>92.5 (66.2-124.3)</b>         | <b>36.8 (22.3-57.7)</b>        | <b>9.2 (4.0-16.5)</b>               |

| <b>Location</b>                       | <b>ASD without ID<br/>(95% UI)</b> | <b>ASD with<br/>borderline ID (95%<br/>UI)</b> | <b>ASD with mild ID<br/>(95% UI)</b> | <b>ASD with moderate<br/>ID (95% UI)</b> | <b>ASD with severe<br/>ID (95% UI)</b> | <b>ASD with<br/>profound ID (95%<br/>UI)</b> |
|---------------------------------------|------------------------------------|------------------------------------------------|--------------------------------------|------------------------------------------|----------------------------------------|----------------------------------------------|
| <b>East Asia</b>                      | <b>295.4 (237.9-356.4)</b>         | <b>130.1 (99.5-165.2)</b>                      | <b>98.4 (73.2-131.1)</b>             | <b>91.3 (65.2-123.1)</b>                 | <b>36.3 (22.0-56.5)</b>                | <b>9.1 (4.0-16.4)</b>                        |
| China                                 | 293.2 (236.1-353.9)                | 129.2 (98.7-164.1)                             | 97.7 (72.7-130.2)                    | 90.6 (64.7-122.2)                        | 36.1 (21.8-56.1)                       | 9.0 (4.0-16.3)                               |
| Democratic People's Republic of Korea | 315.7 (255.3-378.5)                | 139.0 (106.8-174.0)                            | 105.2 (77.9-139.6)                   | 97.6 (69.7-131.6)                        | 38.9 (23.5-61.9)                       | 9.7 (4.2-17.7)                               |
| Taiwan (Province of China)            | 407.3 (328.2-496.5)                | 179.5 (137.1-227.7)                            | 135.8 (99.6-181.2)                   | 125.9 (90.6-170.8)                       | 50.1 (30.2-78.1)                       | 12.5 (5.4-22.9)                              |
| <b>Oceania</b>                        | <b>301.0 (242.1-364.4)</b>         | <b>132.6 (103.0-167.6)</b>                     | <b>100.3 (75.0-134.5)</b>            | <b>93.1 (66.3-125.3)</b>                 | <b>37.0 (22.1-58.4)</b>                | <b>9.2 (4.0-16.3)</b>                        |
| American Samoa                        | 316.9 (257.4-381.8)                | 139.6 (106.7-177.9)                            | 105.6 (78.1-140.7)                   | 98.0 (69.2-132.5)                        | 39.0 (23.7-61.6)                       | 9.7 (4.2-17.8)                               |
| Cook Islands                          | 323.9 (263.6-391.4)                | 142.7 (110.0-181.3)                            | 108.0 (80.2-145.1)                   | 100.2 (71.5-134.4)                       | 39.9 (23.7-62.7)                       | 10.0 (4.4-18.1)                              |
| Fiji                                  | 306.1 (246.2-367.5)                | 134.9 (104.3-170.1)                            | 102.0 (76.0-135.1)                   | 94.7 (67.5-125.8)                        | 37.7 (22.8-59.5)                       | 9.4 (4.1-16.8)                               |
| Guam                                  | 324.5 (263.1-394.8)                | 143.0 (109.2-183.8)                            | 108.2 (79.8-145.1)                   | 100.3 (71.0-135.3)                       | 39.9 (24.3-62.9)                       | 10.0 (4.4-18.3)                              |
| Kiribati                              | 289.4 (232.8-350.1)                | 127.5 (97.6-159.9)                             | 96.4 (71.9-126.6)                    | 89.5 (64.3-120.8)                        | 35.6 (21.5-57.1)                       | 8.9 (3.9-16.0)                               |
| Marshall Islands                      | 302.8 (242.8-362.1)                | 133.4 (102.9-168.6)                            | 100.9 (74.6-135.6)                   | 93.6 (66.6-125.4)                        | 37.3 (22.3-59.0)                       | 9.3 (4.1-16.8)                               |
| Micronesia (Federated States of)      | 305.4 (249.5-365.4)                | 134.5 (104.6-171.8)                            | 101.8 (75.5-136.9)                   | 94.4 (66.7-125.9)                        | 37.6 (22.6-59.3)                       | 9.4 (4.0-17.1)                               |

| Location                 | ASD without ID<br>(95% UI) | ASD with<br>borderline ID (95%<br>UI) | ASD with mild ID<br>(95% UI) | ASD with moderate<br>ID (95% UI) | ASD with severe<br>ID (95% UI) | ASD with<br>profound ID (95%<br>UI) |
|--------------------------|----------------------------|---------------------------------------|------------------------------|----------------------------------|--------------------------------|-------------------------------------|
| Nauru                    | 300.6 (241.0-361.9)        | 132.4 (101.9-168.3)                   | 100.2 (74.5-135.0)           | 92.9 (66.3-123.9)                | 37.0 (22.2-58.4)               | 9.2 (4.0-16.5)                      |
| Niue                     | 313.6 (254.5-373.9)        | 138.2 (106.5-173.7)                   | 104.6 (77.1-138.5)           | 97.0 (69.6-130.8)                | 38.6 (23.4-62.2)               | 9.6 (4.2-17.5)                      |
| Northern Mariana Islands | 328.2 (264.9-395.1)        | 144.6 (111.1-182.8)                   | 109.4 (80.0-146.9)           | 101.5 (72.8-137.0)               | 40.4 (24.3-63.4)               | 10.1 (4.3-18.3)                     |
| Palau                    | 324.8 (262.7-390.6)        | 143.1 (111.7-182.4)                   | 108.3 (81.4-147.1)           | 100.5 (71.4-133.8)               | 40.0 (24.2-63.6)               | 10.0 (4.3-18.0)                     |
| Papua New Guinea         | 299.5 (241.0-364.7)        | 131.9 (102.2-166.5)                   | 99.8 (74.4-133.9)            | 92.6 (65.7-124.4)                | 36.8 (21.9-58.0)               | 9.2 (4.0-16.2)                      |
| Samoa                    | 311.6 (252.6-373.8)        | 137.2 (106.4-172.2)                   | 103.8 (76.9-137.1)           | 96.3 (69.3-128.6)                | 38.3 (23.3-59.3)               | 9.6 (4.1-17.2)                      |
| Solomon Islands          | 300.4 (242.4-361.2)        | 132.3 (102.2-168.8)                   | 100.1 (75.5-134.9)           | 92.9 (66.3-125.3)                | 36.9 (22.4-59.5)               | 9.2 (4.0-16.5)                      |
| Tokelau                  | 319.4 (256.4-382.4)        | 140.7 (108.0-177.2)                   | 106.5 (78.5-141.8)           | 98.7 (69.7-132.0)                | 39.3 (23.9-61.7)               | 9.8 (4.3-17.5)                      |
| Tonga                    | 310.6 (250.4-372.9)        | 136.9 (104.5-172.8)                   | 103.6 (76.9-140.2)           | 96.0 (68.8-129.8)                | 38.2 (23.5-59.7)               | 9.5 (4.2-17.4)                      |
| Tuvalu                   | 306.0 (245.7-365.9)        | 134.8 (104.3-171.4)                   | 102.0 (75.9-136.6)           | 94.6 (67.3-128.1)                | 37.6 (22.5-59.5)               | 9.4 (4.1-16.9)                      |
| Vanuatu                  | 300.0 (240.6-361.1)        | 132.2 (101.4-166.5)                   | 100.0 (74.3-133.9)           | 92.8 (66.2-125.2)                | 36.9 (22.4-58.6)               | 9.2 (3.9-16.4)                      |
| <b>Southeast Asia</b>    | <b>305.3 (246.5-365.3)</b> | <b>134.5 (103.7-169.5)</b>            | <b>101.8 (76.7-135.2)</b>    | <b>94.4 (67.7-126.0)</b>         | <b>37.6 (22.8-58.9)</b>        | <b>9.4 (4.1-16.8)</b>               |

| <b>Location</b>                  | <b>ASD without ID<br/>(95% UI)</b> | <b>ASD with<br/>borderline ID (95%<br/>UI)</b> | <b>ASD with mild ID<br/>(95% UI)</b> | <b>ASD with moderate<br/>ID (95% UI)</b> | <b>ASD with severe<br/>ID (95% UI)</b> | <b>ASD with<br/>profound ID (95%<br/>UI)</b> |
|----------------------------------|------------------------------------|------------------------------------------------|--------------------------------------|------------------------------------------|----------------------------------------|----------------------------------------------|
| Cambodia                         | 300.6 (240.6-362.6)                | 132.4 (102.6-167.7)                            | 100.2 (75.2-135.0)                   | 93.0 (66.2-124.4)                        | 37.0 (22.4-58.7)                       | 9.2 (4.0-16.3)                               |
| Indonesia                        | 289.4 (236.3-347.4)                | 127.5 (97.9-160.3)                             | 96.5 (72.8-128.9)                    | 89.5 (64.0-119.5)                        | 35.6 (21.5-55.5)                       | 8.9 (3.9-15.8)                               |
| Lao People's Democratic Republic | 299.0 (240.7-357.1)                | 131.7 (99.9-168.2)                             | 99.6 (74.8-132.4)                    | 92.5 (65.4-123.7)                        | 36.8 (21.9-59.0)                       | 9.2 (4.1-16.5)                               |
| Malaysia                         | 328.3 (266.7-396.5)                | 144.6 (112.2-180.4)                            | 109.4 (81.3-145.6)                   | 101.5 (72.5-136.2)                       | 40.4 (24.3-63.9)                       | 10.1 (4.4-18.4)                              |
| Maldives                         | 342.4 (276.6-410.4)                | 150.8 (117.3-190.4)                            | 114.2 (84.2-152.0)                   | 105.9 (75.5-141.2)                       | 42.1 (24.9-66.3)                       | 10.5 (4.6-18.6)                              |
| Mauritius                        | 325.5 (264.5-390.9)                | 143.4 (112.0-179.0)                            | 108.5 (80.7-145.0)                   | 100.7 (71.8-136.9)                       | 40.1 (24.2-63.5)                       | 10.0 (4.4-18.2)                              |
| Myanmar                          | 299.0 (244.4-361.8)                | 131.7 (101.1-167.3)                            | 99.6 (73.8-132.0)                    | 92.5 (66.0-124.9)                        | 36.8 (21.9-59.1)                       | 9.2 (4.0-16.6)                               |
| Philippines                      | 306.7 (249.0-367.0)                | 135.1 (103.2-170.7)                            | 102.2 (77.2-135.4)                   | 94.9 (67.9-127.0)                        | 37.7 (22.8-59.0)                       | 9.4 (4.1-16.8)                               |
| Seychelles                       | 328.1 (266.7-394.1)                | 144.5 (110.6-183.9)                            | 109.4 (80.9-145.3)                   | 101.4 (72.2-135.2)                       | 40.4 (24.3-63.8)                       | 10.1 (4.4-18.2)                              |
| Sri Lanka                        | 335.3 (272.6-403.3)                | 147.7 (112.9-185.6)                            | 111.8 (83.6-148.1)                   | 103.6 (73.8-138.7)                       | 41.2 (24.6-64.2)                       | 10.3 (4.5-18.8)                              |
| Thailand                         | 322.8 (257.4-392.2)                | 142.2 (108.1-181.6)                            | 107.6 (79.5-141.0)                   | 99.8 (71.8-134.3)                        | 39.7 (23.4-62.8)                       | 9.9 (4.3-18.1)                               |
| Timor-Leste                      | 302.8 (245.2-367.6)                | 133.4 (102.6-168.9)                            | 100.9 (74.7-133.2)                   | 93.6 (66.2-126.6)                        | 37.2 (22.2-58.4)                       | 9.3 (4.0-17.0)                               |

| Location                          | ASD without ID<br>(95% UI) | ASD with<br>borderline ID (95%<br>UI) | ASD with mild ID<br>(95% UI) | ASD with moderate<br>ID (95% UI) | ASD with severe<br>ID (95% UI) | ASD with<br>profound ID (95%<br>UI) |
|-----------------------------------|----------------------------|---------------------------------------|------------------------------|----------------------------------|--------------------------------|-------------------------------------|
| Viet Nam                          | 324.7 (258.4-389.6)        | 143.0 (111.4-182.1)                   | 108.3 (80.3-146.6)           | 100.4 (71.8-134.3)               | 39.9 (24.2-62.9)               | 10.0 (4.4-17.7)                     |
| <b>Sub-Saharan Africa</b>         | <b>398.0 (325.3-476.2)</b> | <b>175.3 (136.0-220.7)</b>            | <b>132.6 (100.2-176.2)</b>   | <b>123.1 (88.2-164.2)</b>        | <b>49.0 (29.5-76.5)</b>        | <b>12.2 (5.4-21.6)</b>              |
| <b>Central Sub-Saharan Africa</b> | <b>395.8 (321.4-477.7)</b> | <b>174.4 (134.0-217.7)</b>            | <b>131.9 (98.9-175.0)</b>    | <b>122.4 (87.8-162.2)</b>        | <b>48.7 (29.0-77.6)</b>        | <b>12.2 (5.3-21.7)</b>              |
| Angola                            | 393.1 (317.4-467.9)        | 173.1 (133.1-216.7)                   | 131.0 (97.8-173.7)           | 121.6 (87.3-163.1)               | 48.3 (28.6-76.2)               | 12.1 (5.2-21.3)                     |
| Central African Republic          | 379.4 (309.0-458.0)        | 167.2 (129.0-213.0)                   | 126.4 (94.6-167.4)           | 117.4 (83.1-157.6)               | 46.7 (27.6-73.6)               | 11.6 (5.1-20.7)                     |
| Congo                             | 400.7 (321.5-483.7)        | 176.5 (135.4-222.5)                   | 133.5 (99.4-174.8)           | 123.9 (88.6-166.4)               | 49.3 (29.7-76.8)               | 12.3 (5.4-21.8)                     |
| Democratic Republic of the Congo  | 396.9 (318.9-484.1)        | 174.8 (133.9-219.8)                   | 132.2 (99.0-177.2)           | 122.7 (88.0-163.5)               | 48.8 (29.1-78.0)               | 12.2 (5.3-21.7)                     |
| Equatorial Guinea                 | 414.6 (335.0-499.1)        | 182.7 (141.4-231.0)                   | 138.2 (102.6-183.1)          | 128.2 (90.9-171.2)               | 51.0 (30.3-79.4)               | 12.7 (5.6-22.8)                     |
| Gabon                             | 404.7 (329.1-483.1)        | 178.3 (135.7-224.1)                   | 134.9 (101.5-179.5)          | 125.2 (89.5-167.5)               | 49.8 (29.7-78.9)               | 12.4 (5.5-22.1)                     |
| <b>Eastern Sub-Saharan Africa</b> | <b>399.4 (325.1-475.2)</b> | <b>176.0 (136.1-221.4)</b>            | <b>133.1 (100.3-177.0)</b>   | <b>123.5 (89.1-165.1)</b>        | <b>49.1 (29.5-77.0)</b>        | <b>12.3 (5.4-21.6)</b>              |
| Burundi                           | 396.3 (320.2-472.0)        | 174.6 (135.4-219.7)                   | 132.1 (98.2-176.0)           | 122.6 (88.4-165.8)               | 48.8 (28.7-77.6)               | 12.2 (5.3-21.7)                     |
| Comoros                           | 405.5 (330.3-486.1)        | 178.6 (138.2-225.5)                   | 135.1 (100.0-181.2)          | 125.4 (89.8-169.2)               | 49.9 (29.9-79.5)               | 12.5 (5.4-22.2)                     |

| <b>Location</b>             | <b>ASD without ID<br/>(95% UI)</b> | <b>ASD with<br/>borderline ID (95%<br/>UI)</b> | <b>ASD with mild ID<br/>(95% UI)</b> | <b>ASD with moderate<br/>ID (95% UI)</b> | <b>ASD with severe<br/>ID (95% UI)</b> | <b>ASD with<br/>profound ID (95%<br/>UI)</b> |
|-----------------------------|------------------------------------|------------------------------------------------|--------------------------------------|------------------------------------------|----------------------------------------|----------------------------------------------|
| Djibouti                    | 416.5 (334.6-500.5)                | 183.5 (140.6-232.1)                            | 138.8 (103.5-185.4)                  | 128.8 (92.0-173.7)                       | 51.3 (30.9-81.7)                       | 12.8 (5.6-22.7)                              |
| Eritrea                     | 396.4 (320.9-477.6)                | 174.7 (135.1-220.9)                            | 132.1 (99.0-176.4)                   | 122.6 (89.0-165.4)                       | 48.8 (28.9-76.5)                       | 12.2 (5.4-21.8)                              |
| Ethiopia                    | 399.9 (324.3-477.7)                | 176.2 (135.6-221.4)                            | 133.3 (100.3-176.8)                  | 123.7 (89.1-165.3)                       | 49.2 (29.6-76.7)                       | 12.3 (5.5-21.9)                              |
| Kenya                       | 405.2 (328.8-484.0)                | 178.5 (137.5-225.6)                            | 135.0 (101.8-179.0)                  | 125.3 (90.2-166.8)                       | 49.8 (30.0-78.3)                       | 12.4 (5.5-22.1)                              |
| Madagascar                  | 397.6 (324.9-474.0)                | 175.2 (133.9-218.7)                            | 132.5 (99.1-178.3)                   | 123.0 (88.9-166.7)                       | 48.9 (29.1-77.4)                       | 12.2 (5.4-21.6)                              |
| Malawi                      | 396.2 (319.8-477.4)                | 174.6 (133.1-221.7)                            | 132.0 (98.3-173.8)                   | 122.5 (89.0-163.5)                       | 48.7 (29.1-76.5)                       | 12.2 (5.3-21.7)                              |
| Mozambique                  | 390.2 (314.2-467.2)                | 171.8 (132.2-215.2)                            | 130.0 (97.5-173.2)                   | 120.7 (86.1-162.2)                       | 48.0 (28.0-75.2)                       | 12.0 (5.3-21.3)                              |
| Rwanda                      | 398.2 (321.5-476.0)                | 175.5 (135.1-221.7)                            | 132.7 (98.7-176.3)                   | 123.1 (86.6-164.2)                       | 49.0 (28.8-76.9)                       | 12.2 (5.4-21.7)                              |
| Somalia                     | 388.1 (316.6-465.8)                | 171.0 (132.3-217.4)                            | 129.3 (95.9-173.0)                   | 120.0 (86.2-161.7)                       | 47.7 (28.6-74.2)                       | 11.9 (5.2-20.8)                              |
| South Sudan                 | 398.4 (321.8-473.6)                | 175.5 (135.5-221.6)                            | 132.8 (98.2-177.9)                   | 123.2 (87.9-164.6)                       | 49.0 (29.1-76.6)                       | 12.3 (5.3-21.7)                              |
| Uganda                      | 402.4 (328.0-481.5)                | 177.3 (136.4-225.2)                            | 134.1 (99.5-179.3)                   | 124.4 (88.6-166.4)                       | 49.5 (29.5-77.3)                       | 12.4 (5.4-22.1)                              |
| United Republic of Tanzania | 401.2 (323.7-476.9)                | 176.8 (137.0-223.3)                            | 133.7 (99.5-178.1)                   | 124.1 (90.2-166.9)                       | 49.4 (29.7-78.3)                       | 12.3 (5.3-21.7)                              |

| Location                           | ASD without ID<br>(95% UI) | ASD with<br>borderline ID (95%<br>UI) | ASD with mild ID<br>(95% UI) | ASD with moderate<br>ID (95% UI) | ASD with severe<br>ID (95% UI) | ASD with<br>profound ID (95%<br>UI) |
|------------------------------------|----------------------------|---------------------------------------|------------------------------|----------------------------------|--------------------------------|-------------------------------------|
| Zambia                             | 400.6 (324.7-481.5)        | 176.5 (136.3-221.8)                   | 133.5 (99.9-177.1)           | 123.8 (90.1-165.4)               | 49.3 (29.4-78.1)               | 12.3 (5.4-22.2)                     |
| <b>Southern Sub-Saharan Africa</b> | <b>404.0 (328.1-487.9)</b> | <b>178.0 (138.1-225.3)</b>            | <b>134.6 (102.1-178.1)</b>   | <b>124.9 (89.3-166.2)</b>        | <b>49.7 (29.9-77.6)</b>        | <b>12.4 (5.5-21.9)</b>              |
| Botswana                           | 405.0 (326.4-488.8)        | 178.4 (137.1-225.7)                   | 135.0 (101.8-180.4)          | 125.3 (89.8-167.2)               | 49.8 (30.1-78.4)               | 12.5 (5.4-22.2)                     |
| Eswatini                           | 396.4 (320.4-474.3)        | 174.6 (134.9-221.4)                   | 132.1 (98.1-175.3)           | 122.6 (87.3-165.0)               | 48.7 (29.8-76.4)               | 12.2 (5.3-22.4)                     |
| Lesotho                            | 389.4 (317.1-474.3)        | 171.5 (132.7-217.4)                   | 129.8 (97.3-172.1)           | 120.5 (87.0-161.6)               | 47.9 (29.1-75.0)               | 12.0 (5.3-21.3)                     |
| Namibia                            | 404.7 (326.3-491.3)        | 178.2 (138.1-225.3)                   | 134.8 (100.5-179.8)          | 125.1 (89.7-168.3)               | 49.8 (30.0-78.1)               | 12.4 (5.4-22.3)                     |
| South Africa                       | 407.6 (330.5-492.9)        | 179.6 (138.5-226.9)                   | 135.8 (103.0-179.8)          | 126.0 (90.0-167.9)               | 50.1 (30.1-78.5)               | 12.5 (5.5-22.2)                     |
| Zimbabwe                           | 390.7 (314.5-473.4)        | 172.1 (133.5-219.6)                   | 130.2 (96.4-172.1)           | 120.8 (86.7-160.6)               | 48.1 (28.5-75.3)               | 12.0 (5.3-21.3)                     |
| <b>Western Sub-Saharan Africa</b>  | <b>396.2 (323.5-473.5)</b> | <b>174.5 (134.4-220.3)</b>            | <b>132.0 (99.7-175.0)</b>    | <b>122.5 (87.6-163.1)</b>        | <b>48.7 (29.3-75.9)</b>        | <b>12.2 (5.4-21.5)</b>              |
| Benin                              | 397.5 (322.3-479.3)        | 175.1 (134.5-222.6)                   | 132.4 (98.7-174.6)           | 122.9 (88.0-164.0)               | 48.9 (29.3-77.0)               | 12.2 (5.2-22.4)                     |
| Burkina Faso                       | 391.5 (319.6-468.6)        | 172.5 (133.2-218.8)                   | 130.5 (99.3-173.4)           | 121.1 (86.5-162.9)               | 48.1 (28.6-75.8)               | 12.0 (5.3-21.3)                     |
| Cabo Verde                         | 425.4 (345.1-510.0)        | 187.4 (143.4-234.0)                   | 141.8 (105.4-191.6)          | 131.6 (93.5-176.6)               | 52.3 (32.0-82.4)               | 13.1 (5.7-23.6)                     |



| <b>Location</b> | <b>ASD without ID<br/>(95% UI)</b> | <b>ASD with<br/>borderline ID (95%<br/>UI)</b> | <b>ASD with mild ID<br/>(95% UI)</b> | <b>ASD with moderate<br/>ID (95% UI)</b> | <b>ASD with severe<br/>ID (95% UI)</b> | <b>ASD with<br/>profound ID (95%<br/>UI)</b> |
|-----------------|------------------------------------|------------------------------------------------|--------------------------------------|------------------------------------------|----------------------------------------|----------------------------------------------|
| Cameroon        | 399.3 (323.5-480.2)                | 175.9 (134.7-223.7)                            | 133.1 (98.8-175.5)                   | 123.4 (89.0-163.3)                       | 49.1 (29.6-78.2)                       | 12.3 (5.3-21.8)                              |
| Chad            | 391.7 (317.9-471.5)                | 172.6 (132.9-221.2)                            | 130.5 (96.0-175.1)                   | 121.2 (85.4-163.2)                       | 48.2 (28.7-75.3)                       | 12.0 (5.3-21.2)                              |
| Côte d'Ivoire   | 406.5 (325.5-485.7)                | 179.1 (137.2-227.1)                            | 135.5 (99.7-179.7)                   | 125.7 (89.7-167.5)                       | 50.0 (29.6-77.9)                       | 12.5 (5.4-22.2)                              |
| Gambia          | 401.5 (323.6-479.9)                | 176.9 (136.3-224.0)                            | 133.8 (99.1-179.3)                   | 124.1 (90.0-166.6)                       | 49.4 (29.5-76.2)                       | 12.3 (5.3-21.8)                              |
| Ghana           | 400.0 (323.0-485.9)                | 176.1 (136.8-220.6)                            | 133.3 (100.3-178.5)                  | 123.7 (87.7-164.9)                       | 49.2 (30.1-77.3)                       | 12.3 (5.4-22.0)                              |
| Guinea          | 391.2 (314.4-472.8)                | 172.3 (133.0-220.6)                            | 130.3 (97.0-172.0)                   | 121.0 (86.2-161.1)                       | 48.1 (28.5-74.8)                       | 12.0 (5.2-21.7)                              |
| Guinea-Bissau   | 385.7 (310.8-462.2)                | 169.9 (131.0-214.7)                            | 128.5 (96.4-169.3)                   | 119.2 (85.2-159.3)                       | 47.4 (28.2-75.0)                       | 11.8 (5.1-21.1)                              |
| Liberia         | 404.7 (326.4-486.1)                | 178.3 (138.6-226.0)                            | 134.9 (99.6-182.2)                   | 125.1 (89.9-166.9)                       | 49.8 (29.6-79.2)                       | 12.4 (5.4-22.0)                              |
| Mali            | 395.6 (322.6-473.5)                | 174.3 (132.0-218.9)                            | 131.8 (98.6-175.5)                   | 122.3 (87.3-163.5)                       | 48.7 (29.1-77.2)                       | 12.2 (5.3-21.6)                              |
| Mauritania      | 408.8 (328.9-492.8)                | 180.1 (139.8-228.4)                            | 136.2 (102.6-181.7)                  | 126.4 (90.1-168.4)                       | 50.3 (30.0-79.8)                       | 12.5 (5.5-22.0)                              |
| Niger           | 392.1 (318.5-470.9)                | 172.8 (134.0-218.5)                            | 130.7 (97.5-171.5)                   | 121.3 (86.0-162.0)                       | 48.2 (29.0-77.1)                       | 12.0 (5.3-21.5)                              |
| Nigeria         | 394.3 (322.8-470.3)                | 173.7 (133.3-217.9)                            | 131.4 (99.5-174.1)                   | 121.9 (87.1-162.5)                       | 48.5 (29.2-75.7)                       | 12.1 (5.4-21.4)                              |

| <b>Location</b>       | <b>ASD without ID<br/>(95% UI)</b> | <b>ASD with<br/>borderline ID (95%<br/>UI)</b> | <b>ASD with mild ID<br/>(95% UI)</b> | <b>ASD with moderate<br/>ID (95% UI)</b> | <b>ASD with severe<br/>ID (95% UI)</b> | <b>ASD with<br/>profound ID (95%<br/>UI)</b> |
|-----------------------|------------------------------------|------------------------------------------------|--------------------------------------|------------------------------------------|----------------------------------------|----------------------------------------------|
| Sao Tome and Principe | 412.9 (333.9-490.5)                | 181.9 (140.1-227.6)                            | 137.6 (103.0-185.8)                  | 127.7 (91.3-171.6)                       | 50.8 (29.9-78.7)                       | 12.7 (5.6-22.3)                              |
| Senegal               | 402.3 (326.4-486.9)                | 177.2 (135.8-224.5)                            | 134.0 (100.3-178.1)                  | 124.3 (89.1-165.3)                       | 49.5 (30.0-77.1)                       | 12.4 (5.4-22.3)                              |
| Sierra Leone          | 397.6 (320.0-479.6)                | 175.2 (135.5-220.2)                            | 132.5 (99.1-175.8)                   | 122.9 (87.8-164.1)                       | 48.9 (29.3-76.9)                       | 12.2 (5.4-21.8)                              |
| Togo                  | 396.7 (318.4-473.6)                | 174.8 (135.2-222.7)                            | 132.2 (99.6-175.8)                   | 122.7 (88.4-164.4)                       | 48.8 (29.5-76.7)                       | 12.2 (5.4-21.7)                              |

Note: ASD = Autism spectrum disorder, ID = Intellectual disability, UI = Uncertainty interval.

**Table S7: Age-standardised DALY rates per 100 000 persons attributable to ASD by location and sex, 2021**

| Location                                                | Both (95% UI)              | Female (95% UI)           | Male (95% UI)              |
|---------------------------------------------------------|----------------------------|---------------------------|----------------------------|
| <b>Global</b>                                           | <b>147·6 (100·2-208·2)</b> | <b>94·5 (64·5-133·0)</b>  | <b>199·8 (136·3-282·0)</b> |
| <b>Central Europe, Eastern Europe, and Central Asia</b> | <b>173·8 (118·9-244·0)</b> | <b>120·1 (81·6-166·7)</b> | <b>228·7 (157·2-321·8)</b> |
| <b>Central Asia</b>                                     | <b>166·4 (113·2-235·6)</b> | <b>116·0 (80·1-165·1)</b> | <b>217·4 (147·4-307·6)</b> |
| Armenia                                                 | 173·1 (118·2-240·4)        | 120·5 (83·3-169·9)        | 226·6 (154·3-318·4)        |
| Azerbaijan                                              | 168·1 (117·3-234·1)        | 116·9 (80·6-163·1)        | 218·1 (152·1-304·9)        |
| Georgia                                                 | 170·9 (119·4-242·0)        | 119·1 (82·6-170·4)        | 222·6 (154·4-312·8)        |
| Kazakhstan                                              | 168·5 (117·3-239·3)        | 117·6 (80·8-166·1)        | 222·0 (153·8-314·1)        |
| Kyrgyzstan                                              | 167·2 (112·3-236·0)        | 116·7 (79·0-164·3)        | 219·4 (147·0-306·1)        |
| Mongolia                                                | 161·2 (112·0-227·8)        | 113·3 (78·5-160·7)        | 210·8 (142·9-296·4)        |
| Tajikistan                                              | 162·9 (111·2-230·1)        | 113·7 (77·6-162·6)        | 211·2 (144·6-297·2)        |
| Turkmenistan                                            | 166·5 (111·7-233·7)        | 115·1 (78·8-160·7)        | 215·7 (145·5-301·2)        |
| Uzbekistan                                              | 165·1 (112·3-232·7)        | 114·9 (79·7-159·5)        | 215·5 (146·1-303·4)        |
| <b>Central Europe</b>                                   | <b>181·0 (125·2-253·0)</b> | <b>123·9 (84·1-171·0)</b> | <b>237·4 (165·2-334·6)</b> |
| Albania                                                 | 177·5 (121·7-249·6)        | 120·8 (83·1-172·9)        | 232·0 (160·4-325·4)        |
| Bosnia and Herzegovina                                  | 182·3 (127·5-258·5)        | 125·2 (85·9-176·1)        | 238·7 (167·6-341·3)        |
| Bulgaria                                                | 175·7 (121·8-249·1)        | 120·8 (82·9-171·0)        | 229·6 (160·0-320·8)        |
| Croatia                                                 | 187·1 (127·5-264·5)        | 126·5 (86·2-175·5)        | 247·0 (169·1-351·1)        |
| Czechia                                                 | 187·0 (131·1-261·6)        | 126·2 (86·5-176·1)        | 246·3 (170·0-344·8)        |
| Hungary                                                 | 182·5 (124·4-253·3)        | 124·5 (84·5-170·9)        | 240·8 (165·0-333·4)        |
| Montenegro                                              | 183·5 (127·7-260·1)        | 124·3 (84·1-173·7)        | 241·5 (164·3-338·3)        |

| Location                        | Both (95% UI)              | Female (95% UI)            | Male (95% UI)              |
|---------------------------------|----------------------------|----------------------------|----------------------------|
| North Macedonia                 | 179.6 (123.1-251.7)        | 122.3 (83.4-170.5)         | 234.2 (162.7-327.7)        |
| Poland                          | 180.9 (125.2-251.8)        | 124.6 (84.6-172.0)         | 237.0 (165.6-332.0)        |
| Romania                         | 176.5 (121.7-244.6)        | 121.3 (82.8-167.6)         | 231.0 (158.8-320.7)        |
| Serbia                          | 182.1 (125.7-254.1)        | 123.8 (81.7-173.4)         | 237.4 (163.0-327.8)        |
| Slovakia                        | 181.4 (123.9-254.0)        | 124.1 (85.3-170.7)         | 238.2 (160.8-336.0)        |
| Slovenia                        | 190.9 (129.3-268.9)        | 128.1 (86.9-183.2)         | 250.9 (171.7-352.6)        |
| <b>Eastern Europe</b>           | <b>173.9 (119.2-243.4)</b> | <b>120.3 (81.7-166.2)</b>  | <b>229.8 (158.3-321.8)</b> |
| Belarus                         | 177.3 (121.2-247.7)        | 121.9 (83.1-169.1)         | 234.8 (160.2-331.4)        |
| Estonia                         | 181.0 (124.1-249.0)        | 122.9 (85.4-172.2)         | 239.2 (163.4-326.7)        |
| Latvia                          | 176.9 (122.6-248.0)        | 121.4 (83.3-171.1)         | 233.7 (162.3-328.1)        |
| Lithuania                       | 177.3 (121.5-247.7)        | 121.5 (83.6-170.2)         | 234.8 (158.5-329.2)        |
| Republic of Moldova             | 172.5 (116.8-244.3)        | 119.0 (81.8-164.4)         | 227.1 (152.0-322.9)        |
| Russian Federation              | 173.9 (119.7-244.0)        | 120.3 (81.5-166.6)         | 230.1 (159.7-322.7)        |
| Ukraine                         | 172.7 (119.1-240.3)        | 119.9 (82.4-167.2)         | 227.4 (156.8-315.7)        |
| <b>High-income</b>              | <b>204.1 (140.7-284.7)</b> | <b>120.8 (81.9-170.1)</b>  | <b>286.4 (198.8-402.3)</b> |
| <b>Australasia</b>              | <b>222.6 (154.0-314.3)</b> | <b>131.8 (87.9-186.0)</b>  | <b>312.8 (219.1-437.2)</b> |
| Australia                       | 223.5 (155.0-315.0)        | 132.2 (87.9-187.0)         | 314.4 (217.7-440.1)        |
| New Zealand                     | 218.3 (150.3-306.7)        | 129.8 (88.4-180.6)         | 304.7 (209.3-423.9)        |
| <b>High-income Asia Pacific</b> | <b>293.9 (203.2-413.0)</b> | <b>176.0 (120.8-244.4)</b> | <b>407.9 (282.8-578.4)</b> |
| Brunei Darussalam               | 257.7 (176.3-361.1)        | 156.3 (109.0-219.5)        | 349.3 (238.0-485.3)        |
| Japan                           | 299.1 (207.2-420.0)        | 177.1 (120.8-246.0)        | 418.1 (291.3-586.4)        |
| Republic of Korea               | 283.8 (196.0-395.6)        | 175.0 (121.1-246.3)        | 387.6 (267.6-540.9)        |

| Location                         | Both (95% UI)              | Female (95% UI)           | Male (95% UI)              |
|----------------------------------|----------------------------|---------------------------|----------------------------|
| Singapore                        | 280.9 (193.9-388.0)        | 167.7 (114.9-230.5)       | 390.8 (268.0-542.7)        |
| <b>High-income North America</b> | <b>204.0 (141.1-285.5)</b> | <b>130.6 (89.2-182.8)</b> | <b>277.1 (192.5-388.2)</b> |
| Canada                           | 209.6 (146.9-296.0)        | 133.6 (93.1-188.1)        | 284.8 (195.4-409.1)        |
| Greenland                        | 190.4 (131.3-267.9)        | 122.7 (84.6-168.3)        | 252.5 (172.0-352.6)        |
| United States of America         | 203.3 (141.0-283.7)        | 130.3 (88.7-182.3)        | 276.2 (192.2-386.3)        |
| <b>Southern Latin America</b>    | <b>198.2 (134.7-280.3)</b> | <b>123.4 (83.8-172.8)</b> | <b>274.3 (185.6-383.1)</b> |
| Argentina                        | 196.3 (133.8-274.6)        | 122.6 (84.2-169.9)        | 271.6 (184.4-377.3)        |
| Chile                            | 202.8 (139.6-289.4)        | 125.0 (84.5-178.7)        | 280.7 (194.9-393.3)        |
| Uruguay                          | 198.6 (137.5-283.6)        | 123.9 (84.7-177.3)        | 275.6 (189.9-392.7)        |
| <b>Western Europe</b>            | <b>168.3 (115.5-234.8)</b> | <b>88.8 (61.4-124.2)</b>  | <b>246.3 (170.4-341.8)</b> |
| Andorra                          | 170.1 (116.1-239.3)        | 90.3 (61.3-127.2)         | 245.3 (168.6-343.4)        |
| Austria                          | 167.8 (113.2-238.4)        | 90.6 (61.4-128.0)         | 242.6 (163.7-342.8)        |
| Belgium                          | 166.2 (113.2-232.5)        | 90.1 (61.4-126.3)         | 241.2 (164.0-337.8)        |
| Cyprus                           | 166.0 (112.3-233.2)        | 90.1 (61.2-122.7)         | 241.5 (165.2-342.0)        |
| Denmark                          | 177.7 (119.7-245.0)        | 95.8 (65.3-131.4)         | 257.2 (176.4-357.2)        |
| Finland                          | 155.5 (106.7-218.3)        | 88.2 (60.3-124.3)         | 220.6 (151.1-312.1)        |
| France                           | 165.2 (112.7-232.3)        | 89.5 (61.2-127.0)         | 241.2 (166.4-336.1)        |
| Germany                          | 168.4 (116.2-233.5)        | 90.0 (61.9-126.2)         | 242.6 (167.3-338.1)        |
| Greece                           | 165.3 (111.5-233.2)        | 90.2 (62.2-127.0)         | 240.5 (160.2-341.7)        |
| Iceland                          | 196.9 (136.2-273.2)        | 105.4 (71.2-145.8)        | 284.4 (197.4-393.9)        |
| Ireland                          | 200.9 (138.5-279.3)        | 111.0 (76.2-158.0)        | 290.9 (199.9-403.1)        |
| Israel                           | 149.9 (102.6-211.2)        | 83.7 (57.9-119.8)         | 215.3 (146.4-300.2)        |

| Location                           | Both (95% UI)             | Female (95% UI)          | Male (95% UI)              |
|------------------------------------|---------------------------|--------------------------|----------------------------|
| Italy                              | 187.7 (129.6-263.8)       | 104.1 (71.3-146.2)       | 269.5 (186.7-381.1)        |
| Luxembourg                         | 169.4 (116.7-234.6)       | 90.6 (61.2-127.9)        | 245.1 (170.0-340.3)        |
| Malta                              | 168.9 (113.8-236.8)       | 90.4 (62.3-127.8)        | 243.8 (163.0-340.9)        |
| Monaco                             | 167.3 (115.2-235.1)       | 89.7 (62.2-123.6)        | 245.8 (168.7-345.6)        |
| Netherlands                        | 169.0 (117.4-236.9)       | 90.6 (61.7-127.2)        | 246.0 (170.6-345.5)        |
| Norway                             | 151.9 (104.7-214.4)       | 82.8 (56.7-116.6)        | 217.8 (149.9-304.9)        |
| Portugal                           | 161.5 (109.7-227.9)       | 88.4 (60.6-123.4)        | 236.2 (161.3-332.5)        |
| San Marino                         | 167.5 (114.9-234.0)       | 90.4 (62.0-128.1)        | 245.8 (168.4-343.7)        |
| Spain                              | 192.8 (134.5-265.4)       | 84.1 (58.0-117.5)        | 300.1 (207.4-415.3)        |
| Sweden                             | 191.3 (130.9-270.0)       | 93.7 (62.6-133.2)        | 284.4 (196.4-403.5)        |
| Switzerland                        | 169.3 (117.5-235.9)       | 90.2 (61.9-126.0)        | 245.6 (171.1-342.9)        |
| United Kingdom                     | 140.6 (95.4-198.1)        | 75.0 (52.0-105.0)        | 206.6 (140.6-290.1)        |
| <b>Latin America and Caribbean</b> | <b>129.0 (87.1-181.3)</b> | <b>86.4 (58.7-121.0)</b> | <b>172.6 (116.8-243.8)</b> |
| <b>Andean Latin America</b>        | <b>128.5 (86.8-180.9)</b> | <b>86.6 (59.7-120.6)</b> | <b>170.0 (116.3-238.0)</b> |
| Bolivia (Plurinational State of)   | 123.9 (86.2-174.0)        | 84.1 (58.0-118.6)        | 163.7 (113.7-228.6)        |
| Ecuador                            | 128.2 (86.2-178.4)        | 87.0 (59.8-122.6)        | 169.7 (114.9-234.0)        |
| Peru                               | 130.1 (88.4-182.7)        | 87.2 (59.9-121.4)        | 172.2 (119.7-241.8)        |
| <b>Caribbean</b>                   | <b>127.5 (86.5-178.1)</b> | <b>86.2 (60.1-120.9)</b> | <b>169.2 (115.7-235.8)</b> |
| Antigua and Barbuda                | 133.2 (91.2-187.1)        | 89.7 (61.8-127.1)        | 177.6 (122.4-247.9)        |
| Bahamas                            | 129.8 (88.2-180.9)        | 88.6 (61.7-124.0)        | 173.1 (117.3-242.2)        |
| Barbados                           | 133.6 (90.2-188.7)        | 90.0 (60.4-123.5)        | 178.3 (118.9-253.1)        |
| Belize                             | 127.8 (86.1-179.0)        | 87.0 (59.2-124.3)        | 169.2 (114.3-236.4)        |

| Location                         | Both (95% UI)             | Female (95% UI)          | Male (95% UI)              |
|----------------------------------|---------------------------|--------------------------|----------------------------|
| Bermuda                          | 139.2 (94.6-196.9)        | 92.1 (62.2-129.7)        | 187.0 (127.1-265.4)        |
| Cuba                             | 135.7 (92.9-190.6)        | 90.4 (62.7-127.4)        | 179.7 (123.7-252.6)        |
| Dominica                         | 130.2 (90.1-185.4)        | 88.0 (60.2-124.9)        | 170.6 (120.0-240.8)        |
| Dominican Republic               | 126.9 (86.8-176.6)        | 85.9 (59.2-119.6)        | 167.3 (114.4-231.4)        |
| Grenada                          | 130.5 (90.1-182.8)        | 87.7 (60.1-125.3)        | 170.9 (117.6-237.2)        |
| Guyana                           | 123.2 (83.4-171.4)        | 84.4 (58.6-118.4)        | 162.9 (109.5-224.9)        |
| Haiti                            | 116.5 (79.5-164.7)        | 79.5 (55.0-112.9)        | 155.2 (105.5-220.9)        |
| Jamaica                          | 131.8 (92.2-182.6)        | 88.8 (61.2-124.7)        | 174.9 (122.9-242.0)        |
| Puerto Rico                      | 136.9 (93.4-190.8)        | 92.2 (62.2-128.9)        | 183.3 (126.6-252.3)        |
| Saint Kitts and Nevis            | 130.1 (89.4-182.3)        | 87.9 (59.9-124.3)        | 172.0 (117.8-242.0)        |
| Saint Lucia                      | 131.2 (88.7-184.5)        | 88.6 (60.5-124.3)        | 173.0 (116.1-245.0)        |
| Saint Vincent and the Grenadines | 129.7 (88.6-182.4)        | 87.4 (60.8-123.8)        | 170.2 (116.0-239.3)        |
| Suriname                         | 125.5 (85.8-175.1)        | 85.1 (58.5-118.2)        | 166.4 (113.8-232.9)        |
| Trinidad and Tobago              | 130.7 (89.3-181.4)        | 88.2 (60.2-125.2)        | 172.4 (115.9-239.6)        |
| United States Virgin Islands     | 132.9 (91.1-185.5)        | 89.6 (61.6-123.8)        | 176.6 (121.9-249.3)        |
| <b>Central Latin America</b>     | <b>142.2 (96.2-201.3)</b> | <b>95.1 (64.8-133.3)</b> | <b>191.1 (129.1-270.8)</b> |
| Colombia                         | 145.0 (98.1-204.3)        | 96.7 (65.7-137.0)        | 194.3 (131.8-273.1)        |
| Costa Rica                       | 148.6 (101.5-208.9)       | 99.3 (68.0-140.1)        | 200.3 (135.9-278.5)        |
| El Salvador                      | 139.5 (94.5-194.8)        | 95.0 (65.5-134.1)        | 189.4 (129.7-267.0)        |
| Guatemala                        | 135.4 (93.7-191.1)        | 91.8 (62.5-132.3)        | 181.8 (126.7-255.0)        |
| Honduras                         | 136.2 (92.7-192.6)        | 92.0 (62.7-131.7)        | 183.3 (126.7-257.0)        |
| Mexico                           | 142.2 (95.9-199.9)        | 94.9 (64.9-133.9)        | 191.2 (129.2-268.9)        |

| Location                            | Both (95% UI)             | Female (95% UI)          | Male (95% UI)              |
|-------------------------------------|---------------------------|--------------------------|----------------------------|
| Nicaragua                           | 141.5 (95.9-197.8)        | 94.9 (65.5-132.9)        | 189.3 (126.2-265.5)        |
| Panama                              | 146.3 (101.1-207.4)       | 96.4 (66.7-132.5)        | 195.1 (135.5-278.0)        |
| Venezuela (Bolivarian Republic of)  | 142.0 (98.5-199.8)        | 95.5 (66.6-134.8)        | 191.2 (131.0-271.7)        |
| <b>Tropical Latin America</b>       | <b>114.4 (77.1-160.3)</b> | <b>76.3 (51.7-108.4)</b> | <b>153.4 (103.6-215.3)</b> |
| Brazil                              | 114.3 (77.0-160.1)        | 76.2 (51.8-108.5)        | 153.4 (103.5-215.3)        |
| Paraguay                            | 117.4 (79.0-161.8)        | 78.1 (53.5-111.4)        | 155.8 (105.7-215.7)        |
| <b>North Africa and Middle East</b> | <b>144.2 (97.2-202.5)</b> | <b>97.1 (66.5-136.8)</b> | <b>187.9 (127.0-265.0)</b> |
| Afghanistan                         | 130.4 (89.0-183.2)        | 89.8 (62.2-127.4)        | 170.7 (116.1-240.7)        |
| Algeria                             | 145.2 (97.3-202.0)        | 98.5 (66.6-137.4)        | 190.5 (127.6-266.0)        |
| Bahrain                             | 158.7 (110.5-221.9)       | 100.7 (70.0-143.6)       | 197.0 (138.0-275.1)        |
| Egypt                               | 143.0 (96.7-202.4)        | 96.9 (66.0-137.1)        | 185.9 (124.9-261.6)        |
| Iran (Islamic Republic of)          | 147.8 (100.6-208.8)       | 97.6 (66.3-136.5)        | 196.2 (134.2-276.5)        |
| Iraq                                | 132.0 (90.6-184.9)        | 91.6 (63.9-127.3)        | 169.8 (116.2-240.7)        |
| Jordan                              | 151.7 (103.3-212.3)       | 100.1 (67.6-139.9)       | 196.7 (133.5-276.8)        |
| Kuwait                              | 155.0 (104.3-218.7)       | 102.9 (67.9-142.4)       | 201.6 (135.2-280.6)        |
| Lebanon                             | 162.5 (108.4-226.9)       | 112.7 (76.1-155.1)       | 211.6 (143.6-296.6)        |
| Libya                               | 143.6 (97.2-202.8)        | 97.3 (65.6-136.1)        | 187.5 (126.2-264.6)        |
| Morocco                             | 141.2 (97.0-197.0)        | 96.2 (64.9-133.9)        | 185.4 (128.6-260.4)        |
| Oman                                | 156.1 (104.9-218.7)       | 100.7 (67.8-142.0)       | 194.8 (131.6-273.1)        |
| Palestine                           | 145.9 (99.9-204.5)        | 99.8 (67.5-138.8)        | 190.5 (129.3-267.6)        |
| Qatar                               | 180.6 (123.6-251.2)       | 108.2 (73.3-149.3)       | 220.4 (150.9-305.8)        |
| Saudi Arabia                        | 152.8 (104.9-218.5)       | 99.3 (68.5-140.6)        | 192.5 (130.7-275.1)        |



| Location                                      | Both (95% UI)             | Female (95% UI)          | Male (95% UI)              |
|-----------------------------------------------|---------------------------|--------------------------|----------------------------|
| Sudan                                         | 137.5 (94.4-193.5)        | 93.7 (64.7-132.5)        | 179.9 (123.6-251.3)        |
| Syrian Arab Republic                          | 141.1 (96.7-200.1)        | 98.3 (66.4-138.2)        | 189.1 (131.4-268.1)        |
| Tunisia                                       | 146.6 (99.6-206.8)        | 100.0 (68.1-137.9)       | 193.0 (131.6-272.0)        |
| Türkiye                                       | 147.6 (99.7-207.0)        | 100.1 (68.4-141.3)       | 194.3 (131.8-273.0)        |
| United Arab Emirates                          | 157.2 (107.8-220.9)       | 98.1 (68.3-137.3)        | 190.5 (130.6-268.9)        |
| Yemen                                         | 134.8 (93.4-191.5)        | 92.4 (63.5-130.6)        | 176.9 (122.6-249.9)        |
| <b>South Asia</b>                             | <b>127.9 (87.3-180.3)</b> | <b>86.2 (59.6-121.2)</b> | <b>167.9 (114.2-235.6)</b> |
| Bangladesh                                    | 110.3 (75.4-154.6)        | 72.2 (49.5-102.2)        | 149.6 (102.8-210.0)        |
| Bhutan                                        | 121.3 (84.9-169.6)        | 80.9 (54.7-116.6)        | 159.1 (111.2-221.2)        |
| India                                         | 131.9 (89.8-185.2)        | 89.2 (61.7-125.4)        | 172.4 (117.1-242.3)        |
| Nepal                                         | 116.9 (78.7-164.4)        | 79.9 (55.4-113.3)        | 157.6 (105.9-221.8)        |
| Pakistan                                      | 117.5 (81.3-164.4)        | 79.0 (53.9-111.5)        | 154.2 (106.8-215.6)        |
| <b>Southeast Asia, East Asia, and Oceania</b> | <b>126.5 (86.0-178.0)</b> | <b>70.3 (47.3-99.5)</b>  | <b>179.8 (123.0-254.0)</b> |
| <b>East Asia</b>                              | <b>125.1 (84.5-176.3)</b> | <b>61.2 (40.6-86.8)</b>  | <b>184.2 (125.4-259.8)</b> |
| China                                         | 124.2 (83.7-175.1)        | 60.0 (39.9-85.3)         | 183.4 (124.7-258.8)        |
| Democratic People's Republic of Korea         | 133.9 (93.5-187.1)        | 80.6 (54.8-112.8)        | 186.3 (129.8-259.9)        |
| Taiwan (Province of China)                    | 172.2 (119.4-241.7)       | 110.6 (74.0-154.9)       | 232.5 (160.9-325.0)        |
| <b>Oceania</b>                                | <b>126.1 (85.7-176.8)</b> | <b>80.8 (55.1-112.3)</b> | <b>168.5 (116.7-234.7)</b> |
| American Samoa                                | 132.7 (91.1-189.4)        | 84.7 (57.4-121.1)        | 178.6 (122.1-251.0)        |
| Cook Islands                                  | 135.9 (92.4-189.7)        | 86.6 (58.5-122.1)        | 188.0 (127.7-261.9)        |
| Fiji                                          | 128.4 (88.2-184.2)        | 83.1 (56.1-116.9)        | 172.5 (117.3-247.9)        |
| Guam                                          | 136.8 (92.2-192.8)        | 86.3 (59.5-122.3)        | 185.0 (124.0-260.3)        |

| Location                         | Both (95% UI)             | Female (95% UI)          | Male (95% UI)              |
|----------------------------------|---------------------------|--------------------------|----------------------------|
| Kiribati                         | 121.3 (83.7-170.1)        | 79.8 (53.8-114.4)        | 165.2 (114.1-229.0)        |
| Marshall Islands                 | 126.6 (88.6-179.3)        | 81.6 (57.4-113.5)        | 169.7 (118.1-242.1)        |
| Micronesia (Federated States of) | 128.3 (87.0-180.8)        | 82.7 (56.3-115.5)        | 172.4 (115.2-243.7)        |
| Nauru                            | 126.1 (86.0-177.8)        | 81.7 (56.2-114.2)        | 170.5 (115.3-241.6)        |
| Niue                             | 131.6 (89.9-184.0)        | 85.0 (56.8-120.5)        | 176.8 (120.8-246.4)        |
| Northern Mariana Islands         | 138.1 (94.9-193.0)        | 86.5 (58.1-120.9)        | 184.7 (127.4-256.0)        |
| Palau                            | 136.1 (92.0-191.8)        | 84.0 (57.9-118.6)        | 178.3 (120.0-249.0)        |
| Papua New Guinea                 | 125.4 (86.1-174.8)        | 80.2 (54.3-111.7)        | 167.3 (115.8-233.0)        |
| Samoa                            | 130.9 (87.8-184.5)        | 83.7 (56.2-117.2)        | 175.6 (121.7-247.4)        |
| Solomon Islands                  | 126.1 (86.2-176.8)        | 81.3 (56.1-114.5)        | 169.4 (117.0-235.9)        |
| Tokelau                          | 134.1 (92.2-189.3)        | 84.8 (56.4-118.8)        | 181.1 (125.2-255.5)        |
| Tonga                            | 130.7 (89.5-185.5)        | 84.3 (57.4-120.1)        | 178.0 (122.3-250.9)        |
| Tuvalu                           | 129.0 (87.1-180.9)        | 82.0 (56.1-114.8)        | 171.9 (116.5-242.9)        |
| Vanuatu                          | 126.0 (85.9-179.0)        | 82.1 (55.0-118.9)        | 169.3 (115.0-239.8)        |
| <b>Southeast Asia</b>            | <b>128.6 (87.5-181.7)</b> | <b>85.9 (58.5-120.9)</b> | <b>171.0 (116.5-241.5)</b> |
| Cambodia                         | 126.4 (85.8-179.8)        | 82.5 (55.9-115.2)        | 172.1 (116.7-241.2)        |
| Indonesia                        | 122.0 (81.9-172.0)        | 89.7 (60.8-125.8)        | 153.4 (103.0-216.9)        |
| Lao People's Democratic Republic | 126.1 (85.9-177.6)        | 81.9 (55.7-116.7)        | 169.9 (115.9-242.0)        |
| Malaysia                         | 138.2 (95.5-194.9)        | 87.5 (60.0-124.1)        | 185.5 (127.2-254.4)        |
| Maldives                         | 144.4 (97.2-203.4)        | 85.3 (58.2-122.2)        | 186.1 (124.8-261.9)        |
| Mauritius                        | 136.3 (92.5-190.6)        | 86.9 (59.0-121.9)        | 185.8 (125.5-260.0)        |
| Myanmar                          | 125.8 (85.4-178.0)        | 82.2 (55.8-115.2)        | 172.2 (116.8-242.0)        |

| Location                          | Both (95% UI)              | Female (95% UI)           | Male (95% UI)              |
|-----------------------------------|----------------------------|---------------------------|----------------------------|
| Philippines                       | 129.0 (87.3-181.6)         | 83.3 (57.1-117.8)         | 173.4 (118.0-245.7)        |
| Seychelles                        | 138.2 (94.3-194.6)         | 87.3 (58.4-122.5)         | 183.8 (125.1-257.8)        |
| Sri Lanka                         | 140.8 (97.4-197.9)         | 87.1 (58.6-123.6)         | 197.1 (136.0-276.4)        |
| Thailand                          | 136.0 (93.0-192.7)         | 86.9 (57.8-121.3)         | 186.6 (130.0-261.4)        |
| Timor-Leste                       | 126.9 (89.2-179.6)         | 82.4 (57.0-117.1)         | 170.5 (118.3-241.1)        |
| Viet Nam                          | 137.3 (95.2-193.1)         | 79.3 (53.2-110.7)         | 194.8 (134.8-272.7)        |
| <b>Sub-Saharan Africa</b>         | <b>166.0 (113.5-233.6)</b> | <b>116.3 (80.8-164.1)</b> | <b>218.1 (148.1-306.9)</b> |
| <b>Central Sub-Saharan Africa</b> | <b>164.7 (112.4-231.9)</b> | <b>115.5 (79.7-164.1)</b> | <b>214.8 (145.2-302.6)</b> |
| Angola                            | 163.8 (114.2-227.4)        | 116.1 (79.8-163.0)        | 215.7 (148.2-300.9)        |
| Central African Republic          | 157.4 (106.8-223.7)        | 111.8 (76.1-159.3)        | 205.7 (140.1-293.3)        |
| Congo                             | 166.8 (115.3-234.3)        | 116.4 (78.4-162.1)        | 217.9 (153.5-307.5)        |
| Democratic Republic of the Congo  | 165.1 (112.3-232.4)        | 115.4 (78.2-163.4)        | 214.5 (146.7-306.0)        |
| Equatorial Guinea                 | 172.9 (118.2-247.2)        | 117.7 (80.2-166.4)        | 223.2 (152.6-318.3)        |
| Gabon                             | 168.5 (114.2-234.2)        | 118.4 (80.5-166.3)        | 222.4 (149.6-310.0)        |
| <b>Eastern Sub-Saharan Africa</b> | <b>166.8 (114.1-234.9)</b> | <b>116.6 (81.0-164.2)</b> | <b>218.4 (148.7-307.6)</b> |
| Burundi                           | 165.7 (114.8-232.7)        | 115.3 (80.3-162.1)        | 215.0 (149.2-304.9)        |
| Comoros                           | 170.1 (118.7-238.1)        | 118.6 (82.1-166.9)        | 222.0 (154.7-310.0)        |
| Djibouti                          | 174.7 (123.3-247.3)        | 118.8 (82.6-168.4)        | 222.4 (154.6-315.9)        |
| Eritrea                           | 165.7 (114.8-233.7)        | 116.5 (80.3-164.4)        | 214.8 (148.3-301.6)        |
| Ethiopia                          | 167.1 (114.8-234.2)        | 116.4 (79.9-161.9)        | 217.3 (149.4-307.4)        |
| Kenya                             | 169.7 (116.2-238.2)        | 118.6 (82.3-166.7)        | 221.9 (151.7-312.2)        |
| Madagascar                        | 166.5 (116.2-231.6)        | 116.5 (80.9-161.7)        | 218.2 (151.1-308.0)        |

| Location                           | Both (95% UI)              | Female (95% UI)           | Male (95% UI)              |
|------------------------------------|----------------------------|---------------------------|----------------------------|
| Malawi                             | 165.6 (112.8-232.8)        | 116.0 (79.9-166.6)        | 218.6 (150.7-307.3)        |
| Mozambique                         | 161.8 (111.9-225.7)        | 113.8 (77.5-161.1)        | 214.8 (151.5-301.8)        |
| Rwanda                             | 166.5 (113.2-232.4)        | 117.0 (80.3-166.2)        | 220.0 (149.5-302.2)        |
| Somalia                            | 162.2 (111.3-227.5)        | 113.7 (77.8-159.0)        | 210.8 (146.5-298.7)        |
| South Sudan                        | 165.5 (115.3-231.2)        | 115.5 (80.2-161.9)        | 216.2 (148.3-303.3)        |
| Uganda                             | 167.9 (118.2-234.4)        | 117.9 (81.9-166.5)        | 221.3 (156.6-310.2)        |
| United Republic of Tanzania        | 167.6 (115.1-236.8)        | 117.4 (79.9-167.5)        | 221.2 (150.1-308.9)        |
| Zambia                             | 166.4 (114.6-234.3)        | 116.5 (81.5-164.3)        | 217.4 (148.6-304.8)        |
| <b>Southern Sub-Saharan Africa</b> | <b>167.7 (114.9-236.1)</b> | <b>117.3 (80.6-163.5)</b> | <b>220.8 (151.5-311.8)</b> |
| Botswana                           | 168.4 (118.5-236.3)        | 117.8 (83.2-164.6)        | 220.5 (153.1-311.0)        |
| Eswatini                           | 164.4 (114.2-229.1)        | 116.0 (81.6-162.6)        | 216.1 (148.7-302.1)        |
| Lesotho                            | 161.2 (111.2-222.2)        | 114.2 (76.4-163.0)        | 212.1 (142.3-291.0)        |
| Namibia                            | 168.8 (115.9-237.5)        | 119.2 (82.0-168.8)        | 222.2 (151.9-313.8)        |
| South Africa                       | 169.1 (115.8-237.7)        | 117.6 (82.0-164.7)        | 222.4 (151.6-313.9)        |
| Zimbabwe                           | 163.0 (111.9-229.6)        | 115.6 (78.7-162.2)        | 215.5 (149.4-302.4)        |
| <b>Western Sub-Saharan Africa</b>  | <b>165.5 (113.5-232.4)</b> | <b>116.0 (80.7-163.1)</b> | <b>218.3 (148.4-306.6)</b> |
| Benin                              | 166.2 (115.6-231.0)        | 116.0 (79.7-164.2)        | 218.9 (150.9-306.1)        |
| Burkina Faso                       | 163.7 (114.9-228.4)        | 115.1 (78.6-160.0)        | 216.3 (151.7-302.2)        |
| Cabo Verde                         | 178.5 (122.8-251.3)        | 123.3 (84.2-169.3)        | 232.8 (161.3-330.1)        |
| Cameroon                           | 167.0 (114.3-232.9)        | 116.6 (78.7-166.0)        | 218.0 (150.1-302.2)        |
| Chad                               | 163.3 (112.9-229.6)        | 114.1 (77.8-161.0)        | 213.1 (143.4-298.5)        |
| Côte d'Ivoire                      | 169.9 (118.7-236.8)        | 116.5 (79.5-163.6)        | 219.5 (150.4-304.5)        |

| Location              | Both (95% UI)       | Female (95% UI)    | Male (95% UI)       |
|-----------------------|---------------------|--------------------|---------------------|
| Gambia                | 167.6 (116.8-232.6) | 116.6 (81.0-165.7) | 220.4 (153.3-305.2) |
| Ghana                 | 167.6 (112.0-234.3) | 117.8 (80.6-164.5) | 221.4 (147.3-312.1) |
| Guinea                | 163.2 (111.0-228.8) | 114.7 (78.8-160.0) | 215.4 (149.7-304.3) |
| Guinea-Bissau         | 161.4 (112.1-226.0) | 114.1 (80.9-162.2) | 212.4 (146.7-296.8) |
| Liberia               | 167.4 (114.2-232.3) | 114.9 (76.6-160.3) | 218.2 (150.9-302.6) |
| Mali                  | 164.8 (113.2-232.4) | 114.8 (80.6-163.1) | 215.8 (146.7-303.3) |
| Mauritania            | 171.6 (117.0-243.7) | 119.4 (81.3-167.3) | 226.0 (154.6-319.6) |
| Niger                 | 164.2 (112.5-227.7) | 114.7 (79.5-160.8) | 215.5 (146.9-298.7) |
| Nigeria               | 164.6 (112.9-231.7) | 116.1 (80.6-163.2) | 218.6 (148.6-308.5) |
| Sao Tome and Principe | 173.6 (116.0-247.1) | 120.6 (84.1-170.1) | 226.2 (150.7-324.8) |
| Senegal               | 168.1 (117.5-235.9) | 116.9 (80.6-165.4) | 219.7 (150.6-304.7) |
| Sierra Leone          | 166.0 (115.1-235.1) | 115.6 (76.5-165.4) | 216.8 (149.1-308.6) |
| Togo                  | 165.8 (115.4-230.2) | 116.0 (81.1-162.9) | 219.1 (149.4-303.9) |

Note: UI = Uncertainty interval.

### Section 3. References

#### References

1. Zheng P, Barber R, Sorensen RJD, Murray CJL, Aravkin AY. Trimmed Constrained Mixed Effects Models: Formulations and Algorithms. *Journal of Computational and Graphical Statistics* 2021; **30**(3): 544-56.
2. Fullman N, Yearwood J, Abay SM, et al. Measuring performance on the Healthcare Access and Quality Index for 195 countries and territories and selected subnational locations: a systematic analysis from the Global Burden of Disease Study 2016. *The Lancet* 2018; **391**(10136): 2236-71.
3. Viechtbauer W. Conducting meta-analyses in R with the metafor package. *Journal of Statistical Software* 2010; **36**(3): 1-48.
4. R Core Team. R: A Language and Environment for Statistical Computing. Vienna, Austria: R Foundation for Statistical Computing; 2017.
5. Chakrabarti S, Fombonne E. Pervasive developmental disorders in preschool children. *JAMA: Journal of the American Medical Association* 2001; **285**(24): 3093-9.
6. Chakrabarti S, Fombonne E. Pervasive Developmental Disorders in Preschool Children: Confirmation of High Prevalence. *The American Journal of Psychiatry* 2005; **162**(6): 1133-41.
7. Kadesjo B, Gillberg C, Hagberg B. Brief report: autism and Asperger syndrome in seven-year-old children: a total population study. *J Autism Dev Disord* 1999; **29**(4): 327-31.
8. Ellefsen A, Kampmann H, Billstedt E, Gillberg IC, Gillberg C. Autism in the Faroe Islands. An epidemiological study. *Journal of Autism and Developmental Disorders* 2007; **37**(3): 437-44.
9. Kocovska E, Biskupsto R, Carina Gillberg I, et al. The rising prevalence of autism: a prospective longitudinal study in the Faroe Islands. *J Autism Dev Disord* 2012; **42**(9): 1959-66.
10. Mattila M-L, Kielinen M, Linna S-L, et al. Autism spectrum disorders according to DSM-IV-TR and comparison with DSM-5 draft criteria: An epidemiological study. *Journal of the American Academy of Child & Adolescent Psychiatry* 2011; **50**(6): 583-92.
11. Moher D, Liberati A, Tetzlaff J, Altman DG. Preferred reporting items for systematic reviews and meta-analyses: the PRISMA statement. *Ann Intern Med* 2009; **151**(4): 264-9, w64.
12. Page MJ, McKenzie JE, Bossuyt PM, et al. The PRISMA 2020 statement: an updated guideline for reporting systematic reviews. *Bmj* 2021; **372**: n71.
13. Kocovska E, Billstedt E, Ellefsen A, et al. Autism in the Faroe Islands: diagnostic stability from childhood to early adult life. *ScientificWorldJournal* 2013; **2013**: 592371.
14. Honda H, Shimizu Y, Rutter M. No effect of MMR withdrawal on the incidence of autism: a total population study. *Journal of Child Psychology and Psychiatry* 2005; **46**(6): 572-9.
15. Baird G, Charman T, Baron-Cohen S, et al. A screening instrument for autism at 18 months of age: a 6-year follow-up study. *J Am Acad Child Adolesc Psychiatry* 2000; **39**(6): 694-702.
16. Fombonne E, Marcin C, Manero AC, et al. Prevalence of Autism Spectrum Disorders in Guanajuato, Mexico: The Leon survey. *Journal of Autism and Developmental Disorders* 2016; **46**(5): 1669-85.
17. Posserud M, Lundervold AJ, Lie SA, Gillberg C. The prevalence of autism spectrum disorders: Impact of diagnostic instrument and non-response bias. *Social Psychiatry and Psychiatric Epidemiology* 2010; **45**(3): 319-27.
18. Kawamura Y, Takahashi O, Ishii T. Reevaluating the incidence of pervasive developmental disorders: Impact of elevated rates of detection through implementation of an integrated system of screening in Toyota, Japan. *Psychiatry and Clinical Neurosciences* 2008; **62**(2): 152-9.
19. Saemundsen E, Magnússon P, Georgsdóttir I, Egilsson E, Rafnsson V. Prevalence of autism spectrum disorders in an Icelandic birth cohort. *BMJ Open* 2013; **3**(6).
20. Idring S, Lundberg M, Sturm H, et al. Changes in Prevalence of Autism Spectrum Disorders in 2001–2011: Findings from the Stockholm Youth Cohort. *Journal of Autism and Developmental Disorders* 2015; **45**(6): 1766-73.

21. Kantzer AK, Fernell E, Westerlund J, Hagberg B, Gillberg C, Miniscalco C. Young children who screen positive for autism: Stability, change and comorbidity over two years. *Research in Developmental Disabilities* 2016.
22. Bertrand J, Mars A, Boyle C, Bove F, Yeargin-Allsopp M, Decoufle P. Prevalence of autism in a United States population: the Brick Township, New Jersey, investigation. *Pediatrics* 2001; **108**(5): 1155-61.
23. Saito M, Hirota T, Sakamoto Y, et al. Prevalence and cumulative incidence of autism spectrum disorders and the patterns of co-occurring neurodevelopmental disorders in a total population sample of 5-year-old children. *Mol Autism* 2020; **11**(1): 35.
24. Zhou H, Xu X, Yan W, et al. Prevalence of Autism Spectrum Disorder in China: A Nationwide Multi-center Population-based Study Among Children Aged 6 to 12 Years. *Neurosci Bull* 2020; **36**(9): 961-71.
25. Kamio Y, Inada N, Koyama T, Inokuchi E, Tsuchiya K, Kuroda M. Effectiveness of using the Modified Checklist for Autism in Toddlers in two-stage screening of autism spectrum disorder at the 18-month health check-up in Japan. *J Autism Dev Disord* 2014; **44**(1): 194-203.
26. Bryson SE, Clark BS, Smith IM. First report of a Canadian epidemiological study of autistic syndromes. *Child Psychology & Psychiatry & Allied Disciplines* 1988; **29**(4): 433-45.
27. Croen LA, Grether JK, Hoogstrate J, Selvin S. The changing prevalence of autism in California. *Journal of Autism and Developmental Disorders* 2002; **32**(3): 207-15.
28. Yeargin-Allsopp M, Rice C, Karapurkar T, Doernberg N, Boyle C, Murphy C. Prevalence of autism in a US metropolitan area. *JAMA: Journal of the American Medical Association* 2003; **289**(1): 49-55.
29. Barbaresi WJ, Katusic SK, Colligan RC, Weaver AL, Jacobsen SJ. The incidence of autism in Olmsted County, Minnesota, 1976-1997: results from a population-based study. *Arch Pediatr Adolesc Med* 2005; **159**(1): 37-44.
30. Ritvo ER, Freeman BJ, Pingree C, et al. The UCLA-University of Utah epidemiologic survey of autism: Prevalence. *The American Journal of Psychiatry* 1989; **146**(2): 194-9.
31. Wei Z, Ren L, Weng L, et al. Early screening on autism spectrum disorders in 18-24 months old children in Shenzhen: 3 years follow up study. *Chin J Child Health Care* 2012; **20**(4): 354-7.
32. Chen Y, Huang H, Zhao Y, et al. Epidemiological survey on autism spectrum disorders in 2 to 6 years old children in Ranghulu district in Daqing city. *China J Child Health Care* 2010; **18**(4): 331-3.
33. Nygren G, Cederlund M, Sandberg E, et al. The prevalence of autism spectrum disorders in toddlers: A population study of 2-year-old Swedish children. *Journal of Autism and Developmental Disorders* 2012; **42**(7): 1491-7.
34. Samadi SA, McConkey R. Screening for autism in Iranian preschoolers: Contrasting M-CHAT and a scale developed in Iran. *Journal of Autism and Developmental Disorders* 2015; **45**(9): 2908-16.
35. Wang X, Yang W-H, Jin Y, et al. Prevalence of autism spectrum disorders in preschool children of Guangzhou kindergartens. *Chinese Mental Health Journal* 2011; **25**(6): 401-8.
36. Surén P, Schjølberg S, Øyen AS, et al. The autism birth cohort (ABC): A study of autism spectrum disorders in MoBa. *Norsk Epidemiologi* 2014; **24**(1-2): 39-50.
37. Elberling H, Linneberg A, Rask CU, Houman T, Goodman R, Mette Skovgaard A. Psychiatric disorders in Danish children aged 5-7 years: A general population study of prevalence and risk factors from the Copenhagen Child Cohort (CCC 2000). *Nord J Psychiatry* 2016; **70**(2): 146-55.
38. Kim YS, Leventhal BL, Koh Y-J, et al. Prevalence of autism spectrum disorders in a total population sample. *The American Journal of Psychiatry* 2011; **168**(9): 904-12.
